# Supplementary material
Source: MDPI journal article supplement (https://www.mdpi.com/2076-3417/14/2/473)
Supplement: s1 [file s1]

# Supplementally Martials

a) Cortical Regions

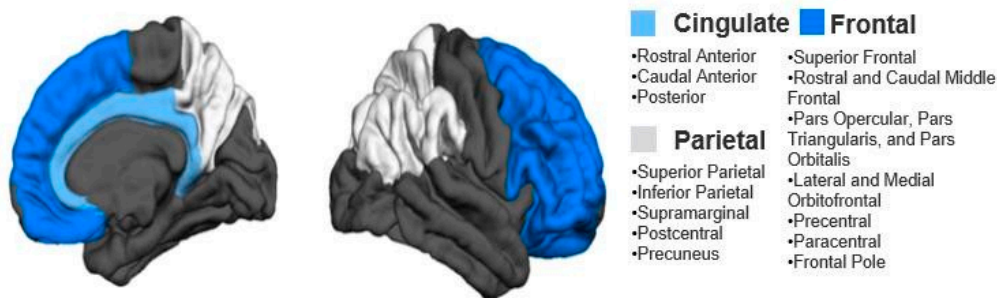

b) Subcortical Regions

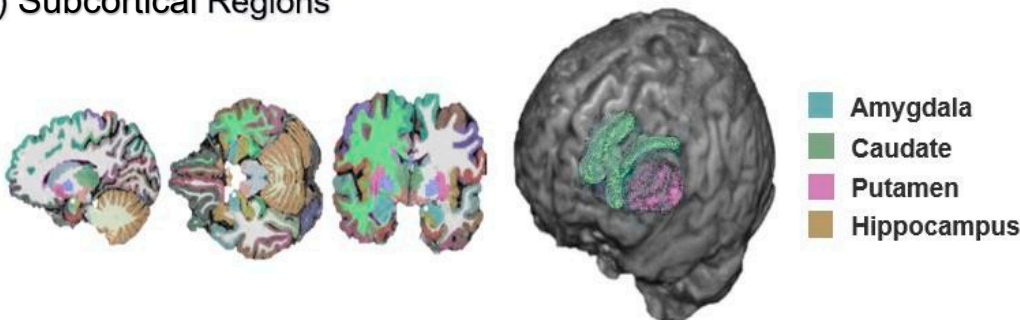

**Supplementary Figure S1.** Comparison between cortical and subcortical regions in the Desikan-Killiany atlas. The labels highlight some of the structures.

**Supplementary Table S1.** List of the anatomical regions of the Desikan-Killiany atlas.

| Cortical regions |                            |                                   |              |                            |                                   |           |
|------------------|----------------------------|-----------------------------------|--------------|----------------------------|-----------------------------------|-----------|
| Label number     | Label Name                 | Name                              | Label number | Label Name                 | Name                              | Lobe      |
| 1                | lh_bankssts                | Banks of superior temporal sulcus | 35           | rh_bankssts                | Banks of superior temporal sulcus |           |
| 2                | lh_caudalanteriorcingulate | Caudal anterior cingulate cortex  | 36           | rh_caudalanteriorcingulate | Caudal anterior cingulate cortex  | Frontal   |
| 3                | lh_caudalmiddlefrontal     | Caudal middle frontal gyrus       | 37           | rh_caudalmiddlefrontal     | Caudal middle frontal gyrus       | Frontal   |
| 4                | lh_cuneus                  | Cuneus                            | 38           | rh_cuneus                  | Cuneus                            | Occipital |
| 5                | lh_entorhinal              | Entorhinal cortex                 | 39           | rh_entorhinal              | Entorhinal cortex                 | Temporal  |
| 6                | lh_fusiform                | Fusiform gyrus                    | 40           | rh_fusiform                | Fusiform gyrus                    | Temporal  |
| 7                | lh_inferiorparietal        | Inferior parietal lobule          | 41           | rh_inferiorparietal        | Inferior parietal lobule          | Parietal  |

|                             |                             |                                   |    |                             |                                   |           |
|-----------------------------|-----------------------------|-----------------------------------|----|-----------------------------|-----------------------------------|-----------|
| 8                           | lh_inferiortemporal         | Inferior temporal gyrus           | 42 | rh_inferiortemporal         | Inferior temporal gyrus           | Temporal  |
| 9                           | lh_lateraloccipital         | Lateral occipital gyrus           | 43 | rh_lateraloccipital         | Lateral occipital gyrus           | Occipital |
| 10                          | lh_lateralorbitofrontal     | Lateral orbitofrontal gyrus       | 44 | rh_lateralorbitofrontal     | Lateral orbitofrontal gyrus       | Frontal   |
| 11                          | lh_lingual                  | Lingual gyrus                     | 45 | rh_lingual                  | Lingual gyrus                     | Occipital |
| 12                          | lh_medialorbitofrontal      | Medial orbitofrontal gyrus        | 46 | rh_medialorbitofrontal      | Medial orbitofrontal gyrus        | Frontal   |
| 13                          | lh_middletemporal           | Middle temporal gyrus             | 47 | rh_middletemporal           | Middle temporal gyrus             | Temporal  |
| 14                          | lh_parahippocampal          | Parahippocampal gyrus             | 48 | rh_parahippocampal          | Parahippocampal gyrus             | Temporal  |
| 15                          | lh_paracentral              | Paracentral gyrus                 | 49 | rh_paracentral              | Paracentral gyrus                 | Frontal   |
| 16                          | lh_parsopercularis          | Pars opercularis                  | 50 | rh_parsopercularis          | Pars opercularis                  | Frontal   |
| 17                          | lh_parsorbitalis            | Pars orbitalis                    | 51 | rh_parsorbitalis            | Pars orbitalis                    | Frontal   |
| 18                          | lh_parstriangularis         | Pars triangularis                 | 52 | rh_parstriangularis         | Pars triangularis                 | Frontal   |
| 19                          | lh_pericalcarine            | Pericalcarine gyrus               | 53 | rh_pericalcarine            | Pericalcarine gyrus               | Occipital |
| 20                          | lh_postcentral              | Postcentral gyrus                 | 54 | rh_postcentral              | Postcentral gyrus                 | Parietal  |
| 21                          | lh_posteriorcingulate       | Posterior cingulate cortex        | 55 | rh_posteriorcingulate       | Posterior cingulate cortex        | Parietal  |
| 22                          | lh_precentral               | Precentral gyrus                  | 56 | rh_precentral               | Precentral gyrus                  | Frontal   |
| 23                          | lh_precuneus                | Precuneus                         | 57 | rh_precuneus                | Precuneus                         | Parietal  |
| 24                          | lh_rostralanteriorcingulate | Rostral anterior cingulate cortex | 58 | rh_rostralanteriorcingulate | Rostral anterior cingulate cortex | Frontal   |
| 25                          | lh_rostralmiddlefrontal     | Rostral middle frontal gyrus      | 59 | rh_rostralmiddlefrontal     | Rostral middle frontal gyrus      | Frontal   |
| 26                          | lh_superiorfrontal          | Superior frontal gyrus            | 60 | rh_superiorfrontal          | Superior frontal gyrus            | Frontal   |
| 27                          | lh_superiorparietal         | Superior parietal lobule          | 61 | rh_superiorparietal         | Superior parietal lobule          | Parietal  |
| 28                          | lh_superiortemporal         | Superior temporal gyrus           | 62 | rh_superiortemporal         | Superior temporal gyrus           | Temporal  |
| 29                          | lh_supramarginal            | Supramarginal gyrus               | 63 | rh_supramarginal            | Supramarginal gyrus               | Parietal  |
| 30                          | lh_frontalpole              | Frontal pole                      | 64 | rh_frontalpole              | Frontal pole                      | Frontal   |
| 31                          | lh_temporalpole             | Temporal pole                     | 65 | rh_temporalpole             | Temporal pole                     | Temporal  |
| 32                          | lh_transversetemporal       | Transverse temporal gyrus         | 66 | rh_transversetemporal       | Transverse temporal gyrus         | Temporal  |
| 33                          | lh_insula                   | Insula                            | 67 | rh_insula                   | Insula                            |           |
| 34                          | lh_isthmuscingulate         | Isthmus cingulate                 | 68 | rh_isthmuscingulate         | Isthmus cingulate                 |           |
| <b>Sub-Cortical regions</b> |                             |                                   |    |                             |                                   |           |
| 69                          | Left-Thalamus-Proper        | Thalamus                          | 85 | Right-Caudate               | Caudate nucleus                   |           |
| 70                          | Left-Hippocampus            | Hippocampus                       | 86 | Right-Amygdala              | Amygdala                          |           |
| 71                          | Left-Caudate                | Caudate nucleus                   | 87 | Right-Accumbens-area        | Nucleus Accumbens                 |           |

|    |                              |                         |     |                               |                         |  |
|----|------------------------------|-------------------------|-----|-------------------------------|-------------------------|--|
| 72 | Left-Amygdala                | Amygdala                | 88  | Right-Lateral-Ventricle       | Lateral ventricles      |  |
| 73 | Left-Accumbens-area          | Nucleus Accumbens       | 89  | Right-Inf-Lat-Vent            |                         |  |
| 74 | Left-Lateral-Ventricle       | Lateral ventricles      | 90  | Right-Cerebellum-White-Matter | Cerebellum-White-Matter |  |
| 75 | Left-Inf-Lat-Vent            |                         | 91  | Right-Cerebellum-Cortex       | Cerebellum-Cortex       |  |
| 76 | Left-Cerebellum-White-Matter | Cerebellum-White-Matter | 92  | Right-Putamen                 | Putamen                 |  |
| 77 | Left-Cerebellum-Cortex       | Cerebellum-Cortex       | 93  | Right-Pallidum                | Pallidum                |  |
| 78 | Left-Putamen                 | Putamen                 | 94  | Right-choroid-plexus          | Choroid-plexus          |  |
| 79 | Left-Pallidum                | Pallidum                | 95  | Right-VentralDC               | VentralDC               |  |
| 80 | Left-choroid-plexus          | Choroid-plexus          | 96  | Right-vessel                  | Vessel                  |  |
| 81 | Left-VentralDC               | VentralDC               | 97  | 3rd-Ventricle                 | Ventricle               |  |
| 82 | Left-vessel                  | Vessel                  | 98  | 4th-Ventricle                 |                         |  |
| 83 | Right-Thalamus-Propor        | Thalamus                | 99  | 5th-Ventricle                 |                         |  |
| 84 | Right-Hippocampus            | Hippocampus             | 100 | Surfaces holes                |                         |  |

**Supplementary Table S2.** Experiment 1: Baseline classifiers' performance using 10-fold CV on training data (n = 510, ABIDE datasets) and prediction on test data (n = 128, ABIDE datasets; n = 33, King Abdulaziz University).

| Algorithm                      | Feature set / Number of features                    | Model Performance | Prediction Performance      |             |             | KAU      |             |             |
|--------------------------------|-----------------------------------------------------|-------------------|-----------------------------|-------------|-------------|----------|-------------|-------------|
|                                |                                                     | Mean Accuracy     | ABIDE I + ABIDE II Accuracy | Sensitivity | Specificity | Accuracy | Sensitivity | Specificity |
| Experiment 1 : Baseline models |                                                     |                   |                             |             |             |          |             |             |
| DT                             | F1: cortical region's volumes/ 66                   | 54.71             | 54.91                       | 53.91       | 53.63       | 48.48    | 48.48       | 47.74       |
| NB                             |                                                     | 55.69             | 65.06                       | 64.06       | 60.16       | 63.64    | 63.64       | 58.08       |
| SVM                            |                                                     | 59.80             | 67.41                       | 66.41       | 64.94       | 69.7     | 69.7        | 68.99       |
| RF                             |                                                     | 61.57             | 63.5                        | 62.5        | 62.06       | 57.58    | 57.58       | 58.46       |
| XGB                            |                                                     | 59.61             | 58.81                       | 57.81       | 57.51       | 57.58    | 57.58       | 57.52       |
| CatBoost                       |                                                     | 62.94             | 58.81                       | 57.81       | 56.76       | 63.64    | 63.64       | 61.84       |
| MLP                            |                                                     | 55.69             | 60.38                       | 59.38       | 57.86       | 63.64    | 63.64       | 61.84       |
| DT                             | F2: volumes of sub-cortical regions / 68            | 54.12             | 54.13                       | 53.13       | 52.70       | 57.58    | 57.58       | 53.76       |
| NB                             |                                                     | 57.45             | 63.5                        | 62.5        | 59.06       | 63.64    | 63.64       | 59.02       |
| SVM                            |                                                     | 61.18             | 61.94                       | 60.94       | 60.46       | 69.7     | 69.7        | 67.11       |
| RF                             |                                                     | 54.90             | 61.94                       | 60.94       | 59.96       | 69.7     | 69.7        | 67.11       |
| XGB                            |                                                     | 58.24             | 61.16                       | 60.16       | 58.78       | 60.61    | 60.61       | 61.09       |
| CatBoost                       |                                                     | 59.02             | 65.06                       | 64.06       | 62.66       | 72.73    | 72.73       | 70.68       |
| MLP                            |                                                     | 55.1              | 58.03                       | 57.03       | 56.08       | 54.55    | 54.55       | 53.95       |
| DT                             | F3: surface area of sub-cortical regions / 70       | 51.37             | 54.13                       | 53.13       | 51.95       | 57.58    | 57.58       | 56.58       |
| NB                             |                                                     | 55.69             | 62.72                       | 61.72       | 58.13       | 69.7     | 69.7        | 64.29       |
| SVM                            |                                                     | 57.25             | 68.97                       | 67.97       | 67.04       | 72.73    | 72.73       | 69.74       |
| RF                             |                                                     | 57.45             | 58.03                       | 57.03       | 55.33       | 72.73    | 72.73       | 70.68       |
| XGB                            |                                                     | 56.86             | 58.03                       | 57.03       | 56.08       | 48.48    | 48.48       | 46.81       |
| CatBoost                       |                                                     | 59.61             | 62.72                       | 61.72       | 60.39       | 54.55    | 54.55       | 53.01       |
| MLP                            |                                                     | 58.82             | 54.91                       | 53.91       | 54.13       | 54.55    | 54.55       | 54.89       |
| DT                             | F4: cortical thickness of sub-cortical regions / 70 | 53.14             | 54.13                       | 53.13       | 51.18       | 45.46    | 45.46       | 43.23       |
| NB                             |                                                     | 55.29             | 64.28                       | 63.28       | 58.63       | 54.55    | 54.55       | 48.31       |
| SVM                            |                                                     | 62.16             | 63.5                        | 62.5        | 59.93       | 72.73    | 72.73       | 67.86       |
| RF                             |                                                     | 61.57             | 59.59                       | 58.59       | 56.38       | 63.64    | 63.64       | 58.08       |
| XGB                            |                                                     | 60.78             | 59.59                       | 58.59       | 57.93       | 72.73    | 72.73       | 69.74       |
| CatBoost                       |                                                     | 63.73             | 61.16                       | 60.16       | 58.03       | 72.73    | 72.73       | 67.86       |
| MLP                            |                                                     | 59.61             | 58.81                       | 57.81       | 56.52       | 39.39    | 39.39       | 42.67       |
| DT                             | F5: mean curvatures of sub-cortical regions / 68    | 56.47             | 61.94                       | 60.94       | 59.96       | 54.55    | 54.55       | 51.13       |
| NB                             |                                                     | 59.41             | 65.06                       | 64.06       | 59.66       | 66.67    | 66.67       | 64.47       |
| SVM                            |                                                     | 62.35             | 65.06                       | 64.06       | 61.91       | 63.64    | 63.64       | 57.14       |
| RF                             |                                                     | 61.96             | 65.84                       | 64.84       | 63.33       | 60.61    | 60.61       | 59.21       |
| XGB                            |                                                     | 59.80             | 60.38                       | 59.38       | 58.11       | 51.52    | 51.52       | 49.44       |
| CatBoost                       |                                                     | 64.12             | 69.75                       | 68.75       | 67.47       | 63.64    | 63.64       | 62.78       |
| MLP                            |                                                     | 59.22             | 64.28                       | 63.28       | 62.24       | 48.48    | 48.48       | 43.99       |
| DT                             | F6: all features / 342                              | 56.67             | 60.38                       | 67.19       | 63.11       | 54.55    | 54.55       | 53.01       |
| NB                             |                                                     | 56.47             | 68.19                       | 62.5        | 61.06       | 63.64    | 63.64       | 57.14       |
| SVM                            |                                                     | 64.12             | 63.5                        | 64.84       | 63.59       | 60.61    | 60.61       | 55.45       |
| RF                             |                                                     | 65.29             | 65.84                       | 62.5        | 61.56       | 48.48    | 48.48       | 44.92       |
| XGB                            |                                                     | 62.94             | 63.5                        | 62.5        | 60.56       | 48.48    | 48.48       | 44.92       |
| CatBoost                       |                                                     | 63.73             | 63.5                        | 65.63       | 64.77       | 51.52    | 51.52       | 47.56       |
| MLP                            |                                                     | 59.22             | 66.63                       | 62.5        | 61.56       | 60.61    | 60.61       | 57.33       |

**Supplementary Table S3.** Experiment 1: classifier performance with random search on training data (n = 510, ABIDE) and prediction results on test data (n = 128, ABIDE; n = 33, KAU).

| Algorithm | Feature set / Number of features                    | Model Performance                         | Prediction Performance |          |             | KAU         |          |             |
|-----------|-----------------------------------------------------|-------------------------------------------|------------------------|----------|-------------|-------------|----------|-------------|
|           |                                                     | Mean Accuracy                             | ABIDE I + ABIDE II     | Accuracy | Sensitivity | Specificity | Accuracy | Sensitivity |
|           |                                                     | Experiment 1 : Models after Random search |                        |          |             |             |          |             |
| DT        | F1: cortical region's volumes/ 66                   | 62.55                                     | 60.38                  | 59.38    | 58.86       | 63.64       | 63.64    | 57.14       |
| NB        |                                                     | 55.88                                     | 65.06                  | 64.06    | 60.16       | 63.64       | 63.64    | 58.08       |
| SVM       |                                                     | 59.80                                     | 65.06                  | 64.06    | 63.16       | 66.67       | 66.67    | 61.65       |
| RF        |                                                     | 62.35                                     | 61.16                  | 60.16    | 58.78       | 60.61       | 60.61    | 58.27       |
| XGB       |                                                     | 62.35                                     | 54.91                  | 53.91    | 52.63       | 51.52       | 51.52    | 51.32       |
| CatBoost  |                                                     | 64.91                                     | 59.59                  | 58.59    | 57.68       | 78.79       | 78.79    | 78.76       |
| MLP       |                                                     | 61.97                                     | 65.84                  | 64.84    | 63.84       | 75.76       | 75.76    | 72.37       |
| DT        | F2: volumes of sub-cortical regions / 68            | 56.27                                     | 67.41                  | 66.41    | 61.69       | 63.64       | 63.64    | 59.96       |
| NB        |                                                     | 57.45                                     | 63.5                   | 62.5     | 59.06       | 63.64       | 63.64    | 59.02       |
| SVM       |                                                     | 60.59                                     | 59.59                  | 58.59    | 57.18       | 60.61       | 60.61    | 60.15       |
| RF        |                                                     | 61.37                                     | 68.19                  | 67.19    | 64.62       | 72.73       | 72.73    | 69.74       |
| XGB       |                                                     | 60.39                                     | 58.81                  | 57.81    | 57.26       | 72.73       | 72.73    | 69.74       |
| CatBoost  |                                                     | 61.57                                     | 64.28                  | 63.28    | 61.99       | 72.73       | 72.73    | 71.62       |
| MLP       |                                                     | 56.27                                     | 62.72                  | 61.72    | 60.64       | 54.55       | 54.55    | 53.95       |
| DT        | F3: surface area of sub-cortical regions / 70       | 54.90                                     | 58.81                  | 57.81    | 55.01       | 60.61       | 60.61    | 62.97       |
| NB        |                                                     | 56.27                                     | 65.06                  | 64.06    | 60.16       | 69.7        | 69.7     | 65.23       |
| SVM       |                                                     | 59.61                                     | 58.03                  | 57.03    | 58.08       | 54.55       | 54.55    | 54.89       |
| RF        |                                                     | 52.55                                     | 63.5                   | 62.5     | 60.31       | 60.61       | 60.61    | 59.21       |
| XGB       |                                                     | 60.78                                     | 59.59                  | 58.59    | 58.68       | 57.58       | 57.58    | 55.64       |
| CatBoost  |                                                     | 60.2                                      | 61.16                  | 60.16    | 59.03       | 66.67       | 66.67    | 63.53       |
| MLP       |                                                     | 56.45                                     | 67.41                  | 66.41    | 65.69       | 48.49       | 48.49    | 46.80       |
| DT        | F4: cortical thickness of sub-cortical regions / 70 | 56.67                                     | 54.13                  | 53.13    | 51.57       | 60.61       | 60.61    | 59.21       |
| NB        |                                                     | 55.69                                     | 64.28                  | 63.28    | 55.92       | 75.76       | 75.76    | 75.19       |
| SVM       |                                                     | 60.59                                     | 61.94                  | 60.94    | 57.12       | 60.61       | 60.61    | 55.45       |
| RF        |                                                     | 61.76                                     | 62.72                  | 61.72    | 58.91       | 78.79       | 78.79    | 0.75        |
| XGB       |                                                     | 63.53                                     | 60.38                  | 59.38    | 58.95       | 66.67       | 66.67    | 63.53       |
| CatBoost  |                                                     | 63.92                                     | 62.72                  | 61.72    | 58.91       | 84.85       | 84.85    | 82.14       |
| MLP       |                                                     | 56.45                                     | 54.91                  | 53.91    | 52.2        | 69.7        | 69.7     | 65.23       |
| DT        | F5: mean curvatures of sub-cortical regions / 68    | 61.37                                     | 66.63                  | 65.63    | 62.51       | 66.67       | 66.67    | 70.11       |
| NB        |                                                     | 59.41                                     | 65.06                  | 64.06    | 59.66       | 66.67       | 66.67    | 64.47       |
| SVM       |                                                     | 60.98                                     | 64.28                  | 63.28    | 59.23       | 69.7        | 69.7     | 70.86       |
| RF        |                                                     | 64.31                                     | 65.06                  | 64.06    | 62.41       | 81.82       | 81.82    | 81.39       |
| XGB       |                                                     | 63.73                                     | 65.06                  | 64.06    | 62.16       | 54.55       | 54.55    | 53.01       |
| CatBoost  |                                                     | 64.91                                     | 69.75                  | 68.75    | 66.72       | 72.73       | 72.73    | 73.50       |
| MLP       |                                                     | 63.73                                     | 63.5                   | 62.5     | 59.31       | 72.73       | 72.73    | 74.44       |
| DT        | F6: all features / 342                              | 59.22                                     | 65.84                  | 64.84    | 61.34       | 60.61       | 60.61    | 58.27       |
| NB        |                                                     | 57.65                                     | 65.84                  | 64.84    | 60.34       | 63.64       | 63.64    | 57.14       |
| SVM       |                                                     | 65.1                                      | 66.63                  | 65.63    | 63.76       | 48.49       | 48.49    | 45.86       |
| RF        |                                                     | 64.12                                     | 66.63                  | 65.63    | 64.26       | 51.52       | 51.52    | 49.44       |
| XGB       |                                                     | 63.92                                     | 67.41                  | 66.41    | 64.94       | 54.55       | 54.55    | 50.19       |
| CatBoost  |                                                     | 66.27                                     | 65.84                  | 64.84    | 63.09       | 51.5        | 48.49    | 44.92       |
| MLP       |                                                     | 62.75                                     | 67.41                  | 66.41    | 64.19       | 54.55       | 54.55    | 53.01       |

**Supplementary Table S4.** Experiment 2 - Optimized classifier performance with RFECV, Boruta, and GWO feature selection on training data (n = 510, ABIDE) and prediction results on test data (n = 128, ABIDE; n = 33, KAU).

| Algorithm                                 | Feature set /<br>Number of<br>features | Model<br>performance | Prediction Performance |             |             |          |             |             |
|-------------------------------------------|----------------------------------------|----------------------|------------------------|-------------|-------------|----------|-------------|-------------|
|                                           |                                        |                      | ABIDE I + ABIDE II     |             |             | KAU      |             |             |
|                                           |                                        | Mean Accuracy        | Accuracy               | Sensitivity | Specificity | Accuracy | Sensitivity | Specificity |
| Experiment 2: after random search + RFECV |                                        |                      |                        |             |             |          |             |             |
| DT                                        | F1 / 12                                | 62.94%               | 60.38%                 | 59.38%      | 58.86%      | 63.64%   | 63.64%      | 57.14%      |
| NB                                        |                                        | 41.59%               | 64.28%                 | 63.28%      | 58.73%      | 69.70%   | 69.70%      | 65.23%      |
| SVM                                       |                                        | 60.78%               | 62.72%                 | 61.72%      | 58.38%      | 72.73%   | 72.73%      | 50.68%      |
| RF                                        |                                        | 62.55%               | 63.50%                 | 62.50%      | 59.81%      | 57.58%   | 57.58%      | 51.88%      |
| XGB                                       |                                        | 66.08%               | 59.59%                 | 58.59%      | 57.43%      | 63.64%   | 63.64%      | 63.72%      |
| CatBoost                                  |                                        | 62.55%               | 62.88%                 | 61.72%      | 59.38%      | 66.67%   | 66.67%      | 61.65%      |
| M1.P                                      |                                        | 61.37%               | 61.94%                 | 60.94%      | 58.46%      | 69.70%   | 69.70%      | 66.17%      |
| DT                                        | F2 / 17                                | 58.63%               | 58.81%                 | 57.81%      | 54.25%      | 72.78%   | 72.73%      | 51.62%      |
| NB                                        |                                        | 57.84%               | 61.16%                 | 60.16%      | 57.03%      | 43.64%   | 63.64%      | 58.06%      |
| SVM                                       |                                        | 64.31%               | 47.41%                 | 46.41%      | 64.94%      | 60.61%   | 60.61%      | 62.97%      |
| RF                                        |                                        | 63.33%               | 66.63%                 | 65.63%      | 64.76%      | 72.73%   | 72.73%      | 68.80%      |
| XGB                                       |                                        | 63.33%               | 64.28%                 | 63.28%      | 61.49%      | 72.78%   | 72.73%      | 70.68%      |
| CatBoost                                  |                                        | 63.92%               | 65.84%                 | 64.84%      | 63.59%      | 72.73%   | 72.73%      | 68.80%      |
| M1.P                                      |                                        | 65.49%               | 64.28%                 | 63.28%      | 61.74%      | 69.69%   | 69.70%      | 47.11%      |
| DT                                        | F3 / 16                                | 60.59%               | 58.81%                 | 57.81%      | 59.01%      | 66.67%   | 66.67%      | 63.53%      |
| NB                                        |                                        | 54.90%               | 65.06%                 | 64.06%      | 60.41%      | 66.66%   | 66.66%      | 60.71%      |
| SVM                                       |                                        | 58.43%               | 61.94%                 | 60.94%      | 60.46%      | 57.58%   | 57.56%      | 54.70%      |
| RF                                        |                                        | 59.02%               | 57.25%                 | 56.25%      | 53.90%      | 72.73%   | 72.73%      | 68.80%      |
| XGB                                       |                                        | 60.98%               | 55.69%                 | 54.69%      | 30.53%      | 57.58%   | 75.76%      | 57.52%      |
| CatBoost                                  |                                        | 58.22%               | 63.50%                 | 62.50%      | 60.56%      | 63.64%   | 63.64%      | 60%         |
| M1.P                                      |                                        | 56.67%               | 61.94%                 | 60.94%      | 59.96%      | 51.52%   | 51.52%      | 48.50%      |
| DT                                        | F4 / 19                                | 59.80%               | 61.94%                 | 60.94%      | 53.63%      | 0.81882  | 81.82%      | 82.33%      |
| NB                                        |                                        | 58.43%               | 65.84%                 | 44.84%      | 60.67%      | 57.58%   | 57.58%      | 52.82%      |
| SVM                                       |                                        | 62.35%               | 57.25%                 | 56.25%      | 53.71%      | 69.70%   | 69.70%      | 64.29%      |
| RF                                        |                                        | 62.55%               | 63.50%                 | 62.50%      | 59.93%      | 66.67%   | 66.67%      | 61.65%      |
| XGB                                       |                                        | 64.31%               | 61.94%                 | 60.94%      | 58.67%      | 66.67%   | 66.67%      | 62.59%      |
| CatBoost                                  |                                        | 63.92%               | 61.16%                 | 60.16%      | 56.10%      | 66.67%   | 66.67%      | 62.59%      |
| M1.P                                      |                                        | 60.78%               | 59.59%                 | 58.59%      | 56.77%      | 66.67%   | 66.67%      | 63.53%      |
| DT                                        | F5 / 29                                | 62.55%               | 58.81%                 | 57.81%      | 58.26%      | 57.58%   | 57.58%      | 53.76%      |
| NB                                        |                                        | 58.24%               | 67.41%                 | 46.41%      | 61.94%      | 78.79%   | 78.79%      | 78.76%      |
| SVM                                       |                                        | 61.76%               | 61.16%                 | 60.16%      | 56.78%      | 60.61%   | 60.60%      | 58.27%      |
| RF                                        |                                        | 62.55%               | 63.50%                 | 62.50%      | 62.31%      | 66.67%   | 66.67%      | 65.41%      |
| XGB                                       |                                        | 63.92%               | 69.75%                 | 68.75%      | 66.72%      | 63.64%   | 63.64%      | 62.78%      |
| CatBoost                                  |                                        | 65.69%               | 65.84%                 | 44.84%      | 62.84%      | 69.70%   | 69.70%      | 68.05%      |
| M1.P                                      |                                        | 61.18%               | 62.72%                 | 61.72%      | 58.38%      | 66.67%   | 66.67%      | 63.53%      |
| DT                                        | F6 / 14                                | 67.24%               | 61.16%                 | 60.16%      | 59.03%      | 45.45%   | 45.45%      | 41.35%      |
| NB                                        |                                        | 57.06%               | 61.28%                 | 43.28%      | 58.23%      | 66.67%   | 66.67%      | 71.41%      |
| SVM                                       |                                        | 61.71%               | 60.38%                 | 59.38%      | 56.36%      | 75.76%   | 75.70%      | 71.43%      |
| RF                                        |                                        | 66.67%               | 57.25%                 | 56.25%      | 54.65%      | 57.58%   | 57.57%      | 32.82%      |
| XGB                                       |                                        | 66.67%               | 64.28%                 | 43.28%      | 62.49%      | 54.55%   | 54.50%      | 41.35%      |
| CatBoost                                  |                                        | 66.86%               | 59.59%                 | 58.59%      | 57.18%      | 57.58%   | 57.58%      | 52.82%      |
| M1.P                                      |                                        | 64.51%               | 57.25%                 | 56.25%      | 55.41%      | 57.58%   | 57.58%      | 50.00%      |

*Continued on the next page*

| Algorithm                                    | Feature set<br>/ Number<br>of<br>features | Model<br>performance<br><br>Mean Accuracy | Prediction Performance |             |             |          |             |             |
|----------------------------------------------|-------------------------------------------|-------------------------------------------|------------------------|-------------|-------------|----------|-------------|-------------|
|                                              |                                           |                                           | ABIDE I + ABIDE II     |             |             | KAU      |             |             |
|                                              |                                           |                                           | Accuracy               | Sensitivity | Specificity | Accuracy | Sensitivity | Specificity |
| Experiment 2: after random search and Boruta |                                           |                                           |                        |             |             |          |             |             |
| DT                                           | F1 / 6                                    | 62.94%                                    | 60.38%                 | 59.37%      | 58.58%      | 63.64%   | 63.64%      | 57.14%      |
| NB                                           |                                           | 59.41%                                    | 61.94%                 | 60.94%      | 55.74%      | 66.67%   | 66.67%      | 61.65%      |
| SVM                                          |                                           | 62.16%                                    | 61.94%                 | 60.94%      | 56.21%      | 66.67%   | 66.67%      | 63.54%      |
| RF                                           |                                           | 62.55%                                    | 61.16%                 | 60.16%      | 57.33%      | 0.696975 | 69.70%      | 70.86%      |
| XGB                                          |                                           | 64.90%                                    | 54.91%                 | 53.06%      | 51.88%      | 60.60%   | 60.61%      | 61.01%      |
| CatBoost                                     |                                           | 64.71%                                    | 66.79%                 | 60.94%      | 60.21%      | 66.67%   | 66.67%      | 60.71%      |
| M1.P                                         |                                           | 62.72%                                    | 66.39%                 | 60.16%      | 56.31%      | 72.73%   | 72.73%      | 68.80%      |
| DT                                           | F2 / 4                                    | 57.62%                                    | 56.47%                 | 55.47%      | 52.98%      | 63.64%   | 63.62%      | 62.78%      |
| NB                                           |                                           | 61.57%                                    | 61.94%                 | 60.94%      | 59.46%      | 63.64%   | 63.64%      | 59.96%      |
| SVM                                          |                                           | 62.35%                                    | 65.83%                 | 64.84%      | 63.84%      | 66.67%   | 66.67%      | 67.29%      |
| RF                                           |                                           | 61.37%                                    | 62.72%                 | 61.72%      | 60.64%      | 60.61%   | 60.61%      | 63.10%      |
| XGB                                          |                                           | 58.63%                                    | 61.94%                 | 60.94%      | 60.21%      | 60.61%   | 60.61%      | 60.15%      |
| CatBoost                                     |                                           | 60.96%                                    | 64.28%                 | 63.28%      | 61.99%      | 69.70%   | 69.70%      | 68.05%      |
| M1.P                                         |                                           | 60.98%                                    | 61.16%                 | 60.16%      | 59.03%      | 69.70%   | 69.70%      | 65.23%      |
| DT                                           | F3 / 3                                    | 60.00%                                    | 58.81%                 | 57.81%      | 58.51%      | 60.61%   | 60.61%      | 55.45%      |
| NB                                           |                                           | 59.02%                                    | 65.07%                 | 64.06%      | 61.41%      | 69.70%   | 69.70%      | 68.05%      |
| SVM                                          |                                           | 60.35%                                    | 64.28%                 | 63.28%      | 61.44%      | 72.73%   | 72.73%      | 70.68%      |
| RF                                           |                                           | 60.20%                                    | 62.72%                 | 61.72%      | 60.64%      | 57.58%   | 57.58%      | 53.76%      |
| XGB                                          |                                           | 62.15%                                    | 56.47%                 | 55.17%      | 54.98%      | 48.48%   | 48.48%      | 48.61%      |
| CatBoost                                     |                                           | 61.37%                                    | 61.16%                 | 60.16%      | 59.11%      | 57.58%   | 57.58%      | 51.88%      |
| M1.P                                         |                                           | 61.18%                                    | 59.59%                 | 54.16%      | 57.93%      | 69.70%   | 69.70%      | 68.05%      |
| DT                                           | F4 / 4                                    | 59.02%                                    | 54.13%                 | 53.13%      | 50.79       | 60.61%   | 60.61%      | 56.39%      |
| NB                                           |                                           | 59.22%                                    | 65.81%                 | 64.84%      | 60.28%      | 66.67%   | 66.67%      | 61.65%      |
| SVM                                          |                                           | 62.5%                                     | 65.81%                 | 64.84%      | 60.28%      | 66.67%   | 66.67%      | 61.65%      |
| RF                                           |                                           | 62.91%                                    | 56.46%                 | 56.17%      | 55.01%      | 63.62%   | 63.64%      | 58.08%      |
| XGB                                          |                                           | 63.53%                                    | 58.81%                 | 57.81%      | 57.30%      | 57.58%   | 57.58%      | 54.70%      |
| CatBoost                                     |                                           | 63.73%                                    | 58.81%                 | 57.81%      | 56.92%      | 66.67%   | 66.67%      | 61.65%      |
| M1.P                                         |                                           | 61.76%                                    | 63.28%                 | 63.28%      | 61.73%      | 66.67%   | 66.67%      | 60.71%      |
| DT                                           | F5 / 4                                    | 63.33%                                    | 61.16%                 | 60.16%      | 58.78%      | 54.55%   | 54.55%      | 53.95%      |
| NB                                           |                                           | 61.56%                                    | 62.72%                 | 61.72%      | 56.32%      | 66.67%   | 66.67%      | 67.29%      |
| SVM                                          |                                           | 65.69%                                    | 64.28%                 | 63.28%      | 60.99%      | 75.76%   | 75.76%      | 74.25%      |
| RF                                           |                                           | 65.10%                                    | 61.94%                 | 60.94%      | 59.96%      | 57.58%   | 57.58%      | 56.58%      |
| XGB                                          |                                           | 64.12%                                    | 67.41%                 | 66.41%      | 64.93%      | 69.70%   | 69.70%      | 69.92%      |
| CatBoost                                     |                                           | 67.45%                                    | 62.72%                 | 61.72%      | 60.14%      | 72.73%   | 72.73%      | 72.56%      |
| M1.P                                         |                                           | 63.73%                                    | 64.28%                 | 63.28%      | 60.99%      | 72.73%   | 72.73%      | 73.50%      |
| DT                                           | F6 / 8                                    | 64.34%                                    | 60.75%                 | 59.38%      | 56.11%      | 57.58%   | 57.58%      | 58.41%      |
| NB                                           |                                           | 70.13%                                    | 65.84%                 | 64.84%      | 60.09%      | 66.06%   | 60.61%      | 55.35%      |
| SVM                                          |                                           | 70.08%                                    | 63.75%                 | 59.38%      | 56.86%      | 54.55%   | 54.55%      | 52.07%      |
| RF                                           |                                           | 70.06%                                    | 58.03%                 | 57.03%      | 55.08%      | 51.52%   | 51.52%      | 52.26%      |
| XGB                                          |                                           | 69.56%                                    | 59.59%                 | 58.59%      | 57.19%      | 48.48%   | 48.48%      | 46.80%      |
| CatBoost                                     |                                           | 66.47%                                    | 61.93%                 | 60.94%      | 58.71%      | 51.52%   | 51.52%      | 48.50%      |
| M1.P                                         |                                           | 64.90%                                    | 63.5%                  | 62.50%      | 60.56%      | 54.55%   | 54.55%      | 50.19%      |

Continued on the next page

| Algorithm                                                                            | Feature set<br>/ Number<br>of<br>features | Model<br>performance<br><br>Mean Accuracy | Prediction Performance |          |             |             |        |        |
|--------------------------------------------------------------------------------------|-------------------------------------------|-------------------------------------------|------------------------|----------|-------------|-------------|--------|--------|
|                                                                                      |                                           |                                           | ABIDE I + ABIDE II     |          |             | KAU         |        |        |
|                                                                                      | Accuracy                                  | Sensitivity                               | Specificity            | Accuracy | Sensitivity | Specificity |        |        |
| Experiment 2: after GWO-based hyperparameter tuning and feature selection algorithms |                                           |                                           |                        |          |             |             |        |        |
| DT                                                                                   | F1 /16                                    | 59.22%                                    | 56.46%                 | 55.7%    | 55.73%      | 69.69%      | 69.70% | 64.29% |
| NB                                                                                   |                                           | 59.80%                                    | 64.28%                 | 63.28%   | 58.49%      | 57.58%      | 57.58% | 50.93% |
| SVM                                                                                  |                                           | 67.6%                                     | 61.94%                 | 60.94%   | 59.46%      | 54.55%      | 54.52% | 49.25% |
| RF                                                                                   |                                           | 63.53%                                    | 61.6%                  | 60.16%   | 59.01%      | 66.67%      | 66.67% | 60.71% |
| XGB                                                                                  |                                           | 67.25%                                    | 55.69%                 | 54.69%   | 51.80%      | 60.61%      | 60.61% | 58.27% |
| CatBoost                                                                             |                                           | 61.18%                                    | 57.25%                 | 56.25%   | 55.41%      | 60.61%      | 60.61% | 55.45% |
| M1.P                                                                                 |                                           | 67.06%                                    | 59.59%                 | 58.59%   | 57.18%      | 60.61%      | 60.61% | 56.93% |
| DT                                                                                   | F2 / 19                                   | 57.65%                                    | 63.50%                 | 62.50%   | 60.31%      | 66.67%      | 66.67% | 65.41% |
| NB                                                                                   |                                           | 58.24%                                    | 62.72%                 | 61.72%   | 59.38%      | 63.64%      | 63.64% | 59.96% |
| SVM                                                                                  |                                           | 65.00%                                    | 60.38%                 | 59.38%   | 57.46%      | 57.58%      | 57.58% | 56.58% |
| RF                                                                                   |                                           | 62.16%                                    | 60.38%                 | 59.38%   | 58.86%      | 72.77%      | 72.73% | 70.68% |
| XGB                                                                                  |                                           | 63.14%                                    | 52.56%                 | 51.56%   | 51.10%      | 60.61%      | 60.61% | 59.21% |
| CatBoost                                                                             |                                           | 64.73%                                    | 58.89%                 | 57.81%   | 57.51%      | 66.67%      | 66.67% | 64.47% |
| M1.P                                                                                 |                                           | 62.35%                                    | 56.47%                 | 55.47%   | 5.62%       | 51.52%      | 51.52% | 54.41% |
| DT                                                                                   | F3 / 14                                   | 60.39%                                    | 51.00%                 | 50.00%   | 52.51%      | 57.58%      | 57.58% | 51.88% |
| NB                                                                                   |                                           | 57.06%                                    | 64.28%                 | 63.28%   | 59.48%      | 69.70%      | 69.70% | 64.29% |
| SVM                                                                                  |                                           | 66.86%                                    | 55.69%                 | 54.68%   | 53.30%      | 54.55%      | 54.55% | 51.13% |
| RF                                                                                   |                                           | 61.37%                                    | 53.34%                 | 52.14%   | 50.53%      | 66.67%      | 66.67% | 65.41% |
| XGB                                                                                  |                                           | 63.33%                                    | 54.13%                 | 53.13%   | 51.70%      | 63.64%      | 63.64% | 61.84% |
| CatBoost                                                                             |                                           | 64.51%                                    | 50.22%                 | 49.22%   | 47.07%      | 48.48%      | 48.48% | 47.74% |
| M1.P                                                                                 |                                           | 60.20%                                    | 59.59%                 | 58.59%   | 58.68%      | 42.42%      | 42.42% | 41.54% |
| DT                                                                                   | F4 / 19                                   | 61.37%                                    | 59.59%                 | 58.59%   | 61.37%      | 59.59%      | 45.45% | 44.17% |
| NB                                                                                   |                                           | 57.06%                                    | 64.28%                 | 63.28%   | 55.92%      | 69.70%      | 69.70% | 68.05% |
| SVM                                                                                  |                                           | 67.8%                                     | 59.59%                 | 58.59%   | 55.99%      | 66.67%      | 66.67% | 62.59% |
| RF                                                                                   |                                           | 65.49%                                    | 63.50%                 | 62.50%   | 59.93%      | 6.67%       | 66.67% | 61.65% |
| XGB                                                                                  |                                           | 67.06%                                    | 56.46%                 | 55.47%   | 54.26%      | 63.64%      | 63.64% | 60.90% |
| CatBoost                                                                             |                                           | 68.63%                                    | 61.16%                 | 60.16%   | 58.03%      | 66.66%      | 66.67% | 62.94% |
| M1.P                                                                                 |                                           | 65.49%                                    | 60.38%                 | 59.38%   | 57.40%      | 60.61%      | 60.61% | 54.51% |
| DT                                                                                   | F5 / 11                                   | 62.16%                                    | 65.06%                 | 64.07%   | 63.16%      | 51.52%      | 51.52% | 49.44% |
| NB                                                                                   |                                           | 60.20%                                    | 62.72%                 | 61.72%   | 56.88%      | 66.67%      | 66.66% | 66.36% |
| SVM                                                                                  |                                           | 70.20%                                    | 63.50%                 | 62.50%   | 60.31%      | 69.70%      | 69.70% | 67.11% |
| RF                                                                                   |                                           | 62.75%                                    | 61.16%                 | 60.16%   | 59.03%      | 66.67%      | 66.67% | 65.41% |
| XGB                                                                                  |                                           | 63.33%                                    | 65.84%                 | 64.84%   | 63.09%      | 63.64%      | 63.64% | 64.66% |
| CatBoost                                                                             |                                           | 69.80%                                    | 62.72%                 | 61.72%   | 60.14%      | 63.64%      | 63.64% | 59.03% |
| M1.P                                                                                 |                                           | 66.86%                                    | 62.72%                 | 61.72%   | 59.88%      | 60.61%      | 60.60% | 57.33% |
| DT                                                                                   | F6 / 62                                   | 61.57%                                    | 58.03%                 | 57.03%   | 52.57%      | 45.45%      | 45.45% | 46.05% |
| NB                                                                                   |                                           | 58.82%                                    | 68.19%                 | 67.19%   | 62.86%      | 60.61%      | 60.61% | 54.54% |
| SVM                                                                                  |                                           | 70%                                       | 65.84%                 | 64.84%   | 63.33%      | 57.58%      | 57.58% | 54.70% |
| RF                                                                                   |                                           | 62.94%                                    | 65.84%                 | 64.84%   | 62.84%      | 42.42%      | 42.42% | 39.66% |
| XGB                                                                                  |                                           | 68.04%                                    | 57.25%                 | 56.25%   | 55.16%      | 51.52%      | 51.52% | 51.32% |
| CatBoost                                                                             |                                           | 69.02%                                    | 62.71%                 | 61.72%   | 60.14%      | 45.45%      | 45.45% | 44.18% |
| M1.P                                                                                 |                                           | 63.33%                                    | 69.75%                 | 68.75%   | 65.72%      | 42.42%      | 68.75% | 43.42% |



**Supplementary Table S5.** Experiment 3: Optimized classifier performance with GWO-based hyperparameter tuning, feature selection algorithms, age, and gender on training data (n = 510, ABIDE) and prediction results on test data (n = 128, ABIDE; n = 33, KAU).

| Experiment 3 : Models with GWO-based hyperparameter tuning and feature selection algorithms + age and gender |                                                  |                                                        |                                           |             |             |          |             |             |
|--------------------------------------------------------------------------------------------------------------|--------------------------------------------------|--------------------------------------------------------|-------------------------------------------|-------------|-------------|----------|-------------|-------------|
| Model                                                                                                        | Feature set / Number of features                 | Model Performance on Training Dataset<br>Mean Accuracy | Prediction Performance on Testing Dataset |             |             |          |             |             |
|                                                                                                              |                                                  |                                                        | ABIDE I + ABIDE II                        |             |             | KAU      |             |             |
|                                                                                                              |                                                  |                                                        | Accuracy                                  | Sensitivity | Specificity | Accuracy | Sensitivity | Specificity |
| SVM                                                                                                          | P5: mean curvatures of sub-cortical regions / 13 | 70.19                                                  | 63.5                                      | 62.5        | 60.31       | 69.67    | 69.67       | 67.12       |
| XGB                                                                                                          |                                                  | 67.06                                                  | 58.03                                     | 57.03       | 55.33       | 78.79    | 78.79       | 75          |
| CatBoost                                                                                                     |                                                  | 69.80                                                  | 62.72                                     | 61.72       | 60.14       | 63.64    | 69.7        | 66.17       |
| SVM                                                                                                          | P6: all features / 62                            | 71                                                     | 64.28                                     | 63.28       | 61.74       | 57.58    | 57.58       | 53.76       |
| XGB                                                                                                          |                                                  | 68.63                                                  | 59.59                                     | 58.59       | 57.18       | 45.45    | 45.45       | 43.23       |
| CatBoost                                                                                                     |                                                  | 69.02                                                  | 62.72                                     | 61.72       | 60.14       | 52.51    | 51.52       | 50.38       |

|                     | F1: Segmentation Volumes                                                                                                                                                                                                                                                                                                                                                       | F2: Parcellation Volumes                                                                                                                                                                                                                                                                                                                                                                                                                                                                                                                                                                       | F3: Parcellation Surface Area                                                                                                                                                                                                                                                                                                                                                                                                                                                                        | F4: Parcellation Thickness                                                                                                                                                                                                                                                                                                                                                                                                                                                                                                                                                                                                                                                                     | F5: Parcellation Mean Curvature                                                                                                                                                                                                                                                                                                                                                                                                                                                                                                                                                                                                                                                                                                                                                                                                                                                                                                                                                                          | F6: All Features                                                                                                                                                                                                                                                                                                                                                                                                                                                                                                                                                                                                                                                                                                                                                                                                                                                                                                                                                                                                                                                                                                                                                                                                                                                                                                                                                                                                                                                                                                                                                                                                                                                                                                                                                                                                                                                                                                                                                                        |
|---------------------|--------------------------------------------------------------------------------------------------------------------------------------------------------------------------------------------------------------------------------------------------------------------------------------------------------------------------------------------------------------------------------|------------------------------------------------------------------------------------------------------------------------------------------------------------------------------------------------------------------------------------------------------------------------------------------------------------------------------------------------------------------------------------------------------------------------------------------------------------------------------------------------------------------------------------------------------------------------------------------------|------------------------------------------------------------------------------------------------------------------------------------------------------------------------------------------------------------------------------------------------------------------------------------------------------------------------------------------------------------------------------------------------------------------------------------------------------------------------------------------------------|------------------------------------------------------------------------------------------------------------------------------------------------------------------------------------------------------------------------------------------------------------------------------------------------------------------------------------------------------------------------------------------------------------------------------------------------------------------------------------------------------------------------------------------------------------------------------------------------------------------------------------------------------------------------------------------------|----------------------------------------------------------------------------------------------------------------------------------------------------------------------------------------------------------------------------------------------------------------------------------------------------------------------------------------------------------------------------------------------------------------------------------------------------------------------------------------------------------------------------------------------------------------------------------------------------------------------------------------------------------------------------------------------------------------------------------------------------------------------------------------------------------------------------------------------------------------------------------------------------------------------------------------------------------------------------------------------------------|-----------------------------------------------------------------------------------------------------------------------------------------------------------------------------------------------------------------------------------------------------------------------------------------------------------------------------------------------------------------------------------------------------------------------------------------------------------------------------------------------------------------------------------------------------------------------------------------------------------------------------------------------------------------------------------------------------------------------------------------------------------------------------------------------------------------------------------------------------------------------------------------------------------------------------------------------------------------------------------------------------------------------------------------------------------------------------------------------------------------------------------------------------------------------------------------------------------------------------------------------------------------------------------------------------------------------------------------------------------------------------------------------------------------------------------------------------------------------------------------------------------------------------------------------------------------------------------------------------------------------------------------------------------------------------------------------------------------------------------------------------------------------------------------------------------------------------------------------------------------------------------------------------------------------------------------------------------------------------------------|
| RFE                 | 1. Left-Caudate<br>2. 3rd-Ventricle<br>3. Brain-Stem<br>4. Left-Amygdala<br>5. Right-Putamen<br>6. Right-VentralDC<br>7. Right-vessel WM-hypointensities<br>8. Optic-Chiasm<br>9. CC_Central<br>10. BrainSegVols-to-eTV<br>12. rhSurfaceHoles                                                                                                                                  | 1. lh_lateraloccipital_volume<br>2. rh_lingual_volume<br>3. lh_precuneus_volume<br>4. lh_rostralanteriorcingulate_volume<br>5. rh_superiortemporal_volume<br>6. rh_caudalanteriorcingulate_volume<br>7. rh_inferiorparietal_volume<br>8. rh_middletemporal_volume<br>9. rh_parsopercularis_volume<br>10. rh_parsorbitalis_volume<br>11. rh_postcentral_volume<br>12. rh_postcentral_volume<br>13. rh_posteriorcingulate_volume<br>14. rh_supramarginal_volume<br>15. rh_frontalpole_volume<br>16. rh_temporalpole_volume                                                                       | 1. rh_entorhinal_area<br>2. rh_inferiorparietal_area<br>3. rh_lateraloccipital_area<br>4. rh_pericalcarine_area<br>5. rh_posteriorcingulate_area<br>6. rh_precuneus_area<br>7. rh_rostralanteriorcingulate_area<br>8. rh_temporalpole_area<br>9. lh_caudalanteriorcingulate_area<br>10. lh_lateralorbitofrontal_area<br>11. lh_parahippocampal_area<br>12. lh_parsorbitalis_area<br>13. lh_superiortemporal_area<br>14. lh_supramarginal_area<br>15. lh_frontalpole_area<br>16. lh_temporalpole_area | 1. rh_caudalanteriorcingulate_thickness<br>2. rh_entorhinal_thickness<br>3. rh_fusiform_thickness<br>4. rh_isthmuscingulate_thickness<br>5. rh_lingual_thickness<br>6. rh_medialorbitofrontal_thickness<br>7. rh_parsorbitalis_thickness<br>8. rh_pericalcarine_thickness<br>9. rh_posteriorcingulate_thickness<br>10. rh_supramarginal_thickness<br>11. rh_temporalpole_thickness<br>12. lh_entorhinal_thickness<br>13. lh_lateralorbitofrontal_thickness<br>14. lh_parahippocampal_thickness<br>15. lh_posteriorcingulate_thickness<br>16. lh_precuneus_thickness<br>17. lh_rostralmiddlefrontal_thickness<br>18. lh_superiortemporal_thickness<br>19. lh_frontalpole_thickness              | 1. lh_cuneus_meancurv<br>2. lh_fusiform_meancurv<br>3. lh_inferiortemporal_meancurv<br>4. lh_lateraloccipital_meancurv<br>5. lh_lateralorbitofrontal_meancurv<br>6. lh_middletemporal_meancurv<br>7. lh_parahippocampal_meancurv<br>8. lh_paracentral_meancurv<br>9. lh_parsorbitalis_meancurv<br>10. lh_pericalcarine_meancurv<br>11. lh_postcentral_meancurv<br>12. lh_precuneus_meancurv<br>13. lh_parsorbitalis_meancurv<br>14. lh_transversetemporal_meancurv<br>15. lh_insula_meancurv<br>16. rh_bankssts_meancurv<br>17. rh_caudalanteriorcingulate_meancurv<br>18. rh_cuneus_meancurv<br>19. rh_inferiorparietal_meancurv<br>20. rh_lateralorbitofrontal_meancurv<br>21. rh_middletemporal_meancurv<br>22. rh_parahippocampal_meancurv<br>23. rh_paracentral_meancurv<br>24. rh_parietangularis_meancurv<br>25. rh_rostralanteriorcingulate_meancurv<br>26. rh_superiorfrontal_meancurv<br>27. rh_superiorparietal_meancurv<br>28. rh_frontalpole_meancurv<br>29. rh_transversetemporal_meancurv | 1. rh_precuneus_area<br>2. rh_transversetemporal_area<br>3. lh_entorhinal_area<br>4. lh_parietangularis_area<br>5. rh_parsopercularis_meancurv<br>6. rh_pericalcarine_meancurv<br>7. rh_bankssts_thickness<br>8. rh_isthmuscingulate_thickness<br>9. lh_superiortemporal_thickness<br>10. rh_parahippocampal_volume<br>11. Left-Putamen<br>12. Right-Pallidum<br>13. CC_Posterior<br>14. lhSurfaceHoles                                                                                                                                                                                                                                                                                                                                                                                                                                                                                                                                                                                                                                                                                                                                                                                                                                                                                                                                                                                                                                                                                                                                                                                                                                                                                                                                                                                                                                                                                                                                                                                 |
| Borda               | 1. Left-Putamen<br>2. 3rd-Ventricle<br>3. Right-Putamen<br>4. lhSurfaceHoles<br>5. rhSurfaceHoles<br>6. SurfaceHoles                                                                                                                                                                                                                                                           | 1. lh_rostralanteriorcingulate_volume<br>2. rh_postcentral_volume<br>3. rh_rostralanteriorcingulate_volume<br>4. rh_frontalpole_volume                                                                                                                                                                                                                                                                                                                                                                                                                                                         | 1. rh_bankssts_area<br>2. rh_paracentral_area<br>3. lh_lateralorbitofrontal_area                                                                                                                                                                                                                                                                                                                                                                                                                     | 1. rh_medialorbitofrontal_thickness<br>2. lh_caudalanteriorcingulate_thickness<br>3. lh_parahippocampal_thickness<br>4. lh_parsorbitalis_thickness                                                                                                                                                                                                                                                                                                                                                                                                                                                                                                                                             | 1. lh_fusiform_meancurv<br>2. lh_lateraloccipital_meancurv<br>3. lh_lingual_meancurv<br>4. lh_superiortemporal_meancurv                                                                                                                                                                                                                                                                                                                                                                                                                                                                                                                                                                                                                                                                                                                                                                                                                                                                                  | 1. lh_lateraloccipital_meancurv<br>2. lh_lingual_meancurv<br>3. rh_isthmuscingulate_thickness<br>4. rh_medialorbitofrontal_thickness<br>5. lh_parsorbitalis_thickness<br>6. Right-Putamen<br>7. lhSurfaceHoles<br>8. SurfaceHoles                                                                                                                                                                                                                                                                                                                                                                                                                                                                                                                                                                                                                                                                                                                                                                                                                                                                                                                                                                                                                                                                                                                                                                                                                                                                                                                                                                                                                                                                                                                                                                                                                                                                                                                                                       |
| GWO-based algorithm | 1. Left-Cerebellum-White-Matter<br>2. Left-Caudate<br>3. CSF<br>4. Left-choroid-plexus<br>5. Right-Inf-Lat-Vent<br>6. Right-Pallidum<br>7. Right-WM-hypointensities<br>8. Left-non-WM-hypointensities<br>9. CC_Posterior<br>10. CC_Central<br>11. CC_Mid_Anterior<br>12. CC_Anterior<br>13. rhCortexVol<br>14. BrainSegVols-to-eTV<br>15. rhSurfaceHoles<br>16. rhSurfaceHoles | 1. lh_fusiform_volume<br>2. lh_inferiorparietal_volume<br>3. lh_lateralorbitofrontal_volume<br>4. lh_parahippocampal_volume<br>5. lh_postcentral_volume<br>6. lh_superiortemporal_volume<br>7. lh_inferiorparietal_volume<br>8. lh_insula_volume<br>9. rh_caudalanteriorcingulate_volume<br>10. rh_cuneus_volume<br>11. rh_entorhinal_volume<br>12. rh_inferiorparietal_volume<br>13. rh_paracentral_volume<br>14. rh_parietangularis_volume<br>15. rh_pericalcarine_volume<br>16. rh_postcentral_volume<br>17. rh_precentral_volume<br>18. rh_superiorparietal_volume<br>19. rh_insula_volume | 1. rh_entorhinal_area<br>2. rh_lateralorbitofrontal_area<br>3. rh_middletemporal_area<br>4. rh_pericalcarine_area<br>5. rh_superiorfrontal_area<br>6. rh_WhiteSurfArea<br>7. rh_entorhinal_area<br>8. rh_lateralorbitofrontal_area<br>9. lh_parsorbitalis_area<br>10. lh_posteriorcingulate_area<br>11. lh_superiorparietal_area<br>12. lh_superiortemporal_area<br>13. lh_supramarginal_area<br>14. lh_temporalpole_area                                                                            | 1. rh_bankssts_thickness<br>2. rh_caudalmiddlefrontal_thickness<br>3. rh_entorhinal_thickness<br>4. rh_isthmuscingulate_thickness<br>5. rh_medialorbitofrontal_thickness<br>6. rh_middletemporal_thickness<br>7. rh_precentral_thickness<br>8. rh_rostralanteriorcingulate_thickness<br>9. rh_superiorfrontal_thickness<br>10. rh_superiortemporal_thickness<br>11. rh_temporalpole_thickness<br>12. rh_caudalanteriorcingulate_thickness<br>13. rh_inferiorparietal_thickness<br>14. lh_lingual_thickness<br>15. lh_middletemporal_thickness<br>16. lh_parahippocampal_thickness<br>17. lh_parsorbitalis_thickness<br>18. rh_rostralmiddlefrontal_thickness<br>19. lh_MeanThickness_thickness | 1. lh_inferiorparietal_meancurv<br>2. lh_middletemporal_meancurv<br>3. lh_pericalcarine_meancurv<br>4. lh_superiorfrontal_meancurv<br>5. lh_frontalpole_meancurv<br>6. rh_lateraloccipital_meancurv<br>7. rh_lingual_meancurv<br>8. rh_middletemporal_meancurv<br>9. rh_pericalcarine_meancurv<br>10. rh_posteriorcingulate_meancurv<br>11. rh_superiorfrontal_meancurv                                                                                                                                                                                                                                                                                                                                                                                                                                                                                                                                                                                                                                  | 1. rh_cuneus_area<br>2. rh_isthmuscingulate_area<br>3. rh_middletemporal_area<br>4. rh_paracentral_area<br>5. rh_parietangularis_area<br>6. rh_posteriorcingulate_area<br>7. rh_precuneus_area<br>8. rh_rostralmiddlefrontal_area<br>9. lh_fusiform_area<br>10. lh_medialorbitofrontal_area<br>11. lh_middletemporal_area<br>12. lh_parsopercularis_area<br>13. lh_supramarginal_area<br>14. lh_transversetemporal_area<br>15. lh_WhiteSurfArea_area<br>16. lh_fusiform_meancurv<br>17. lh_inferiortemporal_meancurv<br>18. lh_inferiorfrontal_meancurv<br>19. lh_supramarginal_meancurv<br>20. lh_frontalpole_meancurv<br>21. lh_superiorfrontal_meancurv<br>22. lh_insula_meancurv<br>23. rh_caudalmiddlefrontal_meancurv<br>24. rh_lateralorbitofrontal_meancurv<br>25. rh_parahippocampal_meancurv<br>26. rh_parietangularis_meancurv<br>27. rh_pericalcarine_meancurv<br>28. rh_precuneus_meancurv<br>29. rh_isthmuscingulate_thickness<br>30. rh_lateralorbitofrontal_thickness<br>31. rh_parietangularis_thickness<br>32. rh_precentral_thickness<br>33. rh_rostralanteriorcingulate_thickness<br>34. rh_frontalpole_thickness<br>35. lh_lateraloccipital_thickness<br>36. lh_lingual_thickness<br>37. lh_superiorparietal_thickness<br>38. lh_supramarginal_thickness<br>39. lh_frontalpole_thickness<br>40. lh_bankssts_volume<br>41. lh_parsopercularis_volume<br>42. lh_postcentral_volume<br>43. lh_precentral_volume<br>44. lh_rostralmiddlefrontal_volume<br>45. lh_temporalpole_volume<br>46. rh_entorhinal_volume<br>47. rh_fusiform_volume<br>48. rh_lateralorbitofrontal_volume<br>49. rh_parsorbitalis_volume<br>50. rh_parietangularis_volume<br>51. rh_rostralmiddlefrontal_volume<br>52. Left-Cerebellum-White-Matter<br>53. 4th-Ventricle<br>54. CSF<br>55. Right-Thalamus-Proprius<br>56. Right-Amygdala<br>57. Right-Accumbens-area<br>58. non-WM-hypointensities<br>59. CC_Posterior<br>60. CC_Anterior<br>61. rhCorticalWhiteMatterVol<br>62. rhSurfaceHoles |

**Supplementary Figure S2.** Selected important features from various morphological sets using different techniques (RFE: recursive feature elimination; GWO: grey wolf optimization). 'Rh' and 'Lh' denote the right and left hemispheres of the brain, respectively.

Each column in the figure above shows the selection of features from the six feature groups by FS techniques

in each row. The colors in each column highlight the feature that is frequently chosen among the various techniques. RFE and Boruta frequently select features highlighted in purple in one column as important. The blue-shaded features were chosen by Boruta and his GWO-based algorithm. The features in pink were chosen using an RFE and GWO-based algorithm, and the features in yellow were chosen using all techniques.

### Statistical differences between ASD and typical development subjects:

To statistically answer the question "Does average the feature differ between ASD and Non-ASD?", we used Independent t-Test in IBM SPSS software [59]. This is an inferential statistical hypothesis test, which draws inferences about the population based on sample data. Two hypotheses are included in this test: 1) Null hypothesis: The means of the two groups are equal. 2) Alternative hypothesis: The means for the two groups are not equal.

If the p-value is less than the significance threshold (here, 0.05), then the null hypothesis is rejected. Thus, the difference between the two averages is statistically significant. Attached are the stats of the two groups (mean, Std. deviation, and Std. error mean) and ABIDEs' subjects independent t-test results for all features, see Table S6-S7.

**Supplementary Table S6.** Brain morphometric statistics for the two ABIDE datasets.

| Group Statistics                |         |     |            |                |                 |
|---------------------------------|---------|-----|------------|----------------|-----------------|
|                                 | asd     | N   | Mean       | Std. Deviation | Std. Error Mean |
| rh_bankssts_area                | ASD     | 292 | 963.39726  | 220.187033     | 12.885471       |
|                                 | non-ASD | 346 | 990.64498  | 181.181376     | 9.740371        |
| rh_caudalanteriorcingulate_area | ASD     | 292 | 748.70548  | 185.197236     | 10.837848       |
|                                 | non-ASD | 346 | 778.01790  | 158.793140     | 8.536772        |
| rh_caudalmiddlefrontal_area     | ASD     | 292 | 2201.2842  | 494.13694      | 28.91718        |
|                                 | non-ASD | 346 | 2265.3647  | 419.72291      | 22.56444        |
| rh_cuneus_area                  | ASD     | 292 | 1502.26027 | 295.173816     | 17.273741       |
|                                 | non-ASD | 346 | 1516.46021 | 267.658826     | 14.389428       |
| rh_entorhinal_area              | ASD     | 292 | 353.94521  | 122.825850     | 7.187839        |
|                                 | non-ASD | 346 | 363.83072  | 132.720857     | 7.135117        |
| rh_fusiform_area                | ASD     | 292 | 3200.55822 | 637.976763     | 37.334766       |
|                                 | non-ASD | 346 | 3327.48903 | 548.038382     | 29.462726       |
| rh_inferiorparietal_area        | ASD     | 292 | 5721.88014 | 1050.493183    | 61.475464       |
|                                 | non-ASD | 346 | 5808.74927 | 912.842919     | 49.074739       |
| rh_inferiortemporal_area        | ASD     | 292 | 3164.87671 | 697.881393     | 40.840419       |
|                                 | non-ASD | 346 | 3301.02091 | 594.392057     | 31.954715       |
| rh_isthmuscingulate_area        | ASD     | 292 | 998.39041  | 198.441327     | 11.612900       |
|                                 | non-ASD | 346 | 996.72036  | 184.311028     | 9.908622        |
| rh_lateraloccipital_area        | ASD     | 292 | 4771.28767 | 834.171136     | 48.816173       |
|                                 | non-ASD | 346 | 4814.48056 | 705.747505     | 37.941221       |
| rh_lateralorbitofrontal_area    | ASD     | 292 | 2464.24658 | 516.926598     | 30.250841       |
|                                 | non-ASD | 346 | 2615.12203 | 437.766110     | 23.534452       |
| rh_lingual_area                 | ASD     | 292 | 2973.42466 | 616.666628     | 36.087685       |
|                                 | non-ASD | 346 | 3111.41404 | 537.184422     | 28.879213       |
| rh_medialorbitofrontal_area     | ASD     | 292 | 1769.35959 | 365.004887     | 21.360295       |
|                                 | non-ASD | 346 | 1857.25787 | 297.434789     | 15.990193       |

|                                  |         |     |            |             |           |
|----------------------------------|---------|-----|------------|-------------|-----------|
| rh_middletemporal_area           | ASD     | 292 | 3407.35959 | 635.207965  | 37.172734 |
|                                  | non-ASD | 346 | 3526.85331 | 578.759747  | 31.114317 |
| rh_parahippocampal_area          | ASD     | 292 | 702.19     | 136.412     | 7.983     |
|                                  | non-ASD | 346 | 715.08     | 171.716     | 9.232     |
| rh_paracentral_area              | ASD     | 292 | 1593.39041 | 296.353575  | 17.342781 |
|                                  | non-ASD | 346 | 1575.30416 | 232.670196  | 12.508427 |
| rh_parsopercularis_area          | ASD     | 292 | 1421.98288 | 313.566037  | 18.350064 |
|                                  | non-ASD | 346 | 1456.61910 | 266.509851  | 14.327658 |
| rh_parsorbitalis_area            | ASD     | 292 | 779.25000  | 147.038845  | 8.604798  |
|                                  | non-ASD | 346 | 803.76099  | 136.583057  | 7.342751  |
| rh_parstriangularis_area         | ASD     | 292 | 1512.43151 | 324.875613  | 19.011907 |
|                                  | non-ASD | 346 | 1570.45451 | 305.336170  | 16.414974 |
| rh_pericalcarine_area            | ASD     | 292 | 1390.41096 | 330.655076  | 19.350125 |
|                                  | non-ASD | 346 | 1477.31573 | 293.956552  | 15.803202 |
| rh_postcentral_area              | ASD     | 292 | 4170.90068 | 699.456667  | 40.932605 |
|                                  | non-ASD | 346 | 4256.40254 | 631.741895  | 33.962655 |
| rh_posteriorcingulate_area       | ASD     | 292 | 1256.00000 | 267.401355  | 15.648481 |
|                                  | non-ASD | 346 | 1275.18844 | 226.270963  | 12.164402 |
| rh_precentral_area               | ASD     | 292 | 4952.35616 | 812.938941  | 47.573653 |
|                                  | non-ASD | 346 | 4979.09033 | 660.498005  | 35.508593 |
| rh_precuneus_area                | ASD     | 292 | 4182.65068 | 735.202290  | 43.024460 |
|                                  | non-ASD | 346 | 4192.22026 | 654.848331  | 35.204864 |
| rh_rostralanteriorcingulate_area | ASD     | 292 | 638.30822  | 169.919369  | 9.943779  |
|                                  | non-ASD | 346 | 678.26935  | 147.250467  | 7.916234  |
| rh_rostralmiddlefrontal_area     | ASD     | 292 | 6026.87329 | 1221.704758 | 71.494863 |
|                                  | non-ASD | 346 | 6208.13360 | 1023.764262 | 55.037908 |
| rh_superiorfrontal_area          | ASD     | 292 | 7178.22260 | 1238.910466 | 72.501751 |
|                                  | non-ASD | 346 | 7333.06998 | 997.739559  | 53.638811 |
| rh_superiorparietal_area         | ASD     | 292 | 5572.70548 | 922.813345  | 54.003566 |
|                                  | non-ASD | 346 | 5667.94874 | 772.149047  | 41.510990 |
| rh_superiortemporal_area         | ASD     | 292 | 3640.45548 | 634.690455  | 37.142449 |
|                                  | non-ASD | 346 | 3704.57293 | 564.006300  | 30.321167 |
| rh_supramarginal_area            | ASD     | 292 | 3837.13699 | 692.746713  | 40.539935 |
|                                  | non-ASD | 346 | 3874.59320 | 651.447227  | 35.022020 |
| rh_frontalpole_area              | ASD     | 292 | 310.02740  | 55.744255   | 3.262186  |
|                                  | non-ASD | 346 | 304.33352  | 47.598462   | 2.558909  |
| rh_temporalpole_area             | ASD     | 292 | 421.86644  | 83.949416   | 4.912768  |
|                                  | non-ASD | 346 | 432.24070  | 109.269848  | 5.874383  |
| rh_transversetemporal_area       | ASD     | 292 | 349.93836  | 75.453654   | 4.415591  |
|                                  | non-ASD | 346 | 352.98036  | 68.042531   | 3.657989  |
| rh_insula_area                   | ASD     | 292 | 2080.90753 | 343.844899  | 20.122001 |
|                                  | non-ASD | 346 | 2114.89931 | 369.019470  | 19.838610 |
| rh_WhiteSurfArea_area            | ASD     | 292 | 86259.017  | 13090.9969  | 766.0926  |
|                                  | non-ASD | 345 | 88501.734  | 10006.5629  | 538.7352  |
| lh_bankssts_area                 | ASD     | 292 | 1055.69    | 219.719     | 12.858    |
|                                  | non-ASD | 346 | 1089.77    | 215.143     | 11.566    |
| lh_caudalanteriorcingulate_area  | ASD     | 292 | 639.24     | 160.935     | 9.418     |
|                                  | non-ASD | 346 | 663.15     | 141.426     | 7.603     |
| lh_caudalmiddlefrontal_area      | ASD     | 292 | 2376.77    | 492.614     | 28.828    |
|                                  | non-ASD | 346 | 2454.31    | 392.231     | 21.086    |

|                                  |         |     |         |          |        |
|----------------------------------|---------|-----|---------|----------|--------|
| lh_cuneus_area                   | ASD     | 292 | 1417.83 | 283.325  | 16.580 |
|                                  | non-ASD | 346 | 1459.45 | 249.150  | 13.394 |
| lh_entorhinal_area               | ASD     | 292 | 385.13  | 109.406  | 6.403  |
|                                  | non-ASD | 346 | 417.17  | 142.204  | 7.645  |
| lh_fusiform_area                 | ASD     | 292 | 3288.76 | 611.157  | 35.765 |
|                                  | non-ASD | 346 | 3423.48 | 556.017  | 29.892 |
| lh_inferiorparietal_area         | ASD     | 292 | 4770.03 | 861.639  | 50.424 |
|                                  | non-ASD | 346 | 4889.98 | 774.721  | 41.649 |
| lh_inferiortemporal_area         | ASD     | 292 | 3279.52 | 710.250  | 41.564 |
|                                  | non-ASD | 346 | 3428.55 | 617.237  | 33.183 |
| lh_isthmuscingulate_area         | ASD     | 292 | 1115.76 | 239.915  | 14.040 |
|                                  | non-ASD | 346 | 1102.95 | 205.312  | 11.038 |
| lh_lateraloccipital_area         | ASD     | 292 | 4911.24 | 765.615  | 44.804 |
|                                  | non-ASD | 346 | 4954.39 | 670.164  | 36.028 |
| lh_lateralorbitofrontal_area     | ASD     | 292 | 2504.25 | 531.767  | 31.119 |
|                                  | non-ASD | 346 | 2688.20 | 427.527  | 22.984 |
| lh_lingual_area                  | ASD     | 292 | 2937.45 | 642.003  | 37.570 |
|                                  | non-ASD | 346 | 3107.38 | 566.447  | 30.452 |
| lh_medialorbitofrontal_area      | ASD     | 292 | 1714.08 | 305.303  | 17.867 |
|                                  | non-ASD | 346 | 1811.06 | 269.229  | 14.474 |
| lh_middletemporal_area           | ASD     | 292 | 3022.85 | 579.157  | 33.893 |
|                                  | non-ASD | 346 | 3179.46 | 529.785  | 28.481 |
| lh_parahippocampal_area          | ASD     | 292 | 726.91  | 177.726  | 10.401 |
|                                  | non-ASD | 346 | 750.78  | 166.561  | 8.954  |
| lh_paracentral_area              | ASD     | 292 | 1419.58 | 237.606  | 13.905 |
|                                  | non-ASD | 346 | 1396.04 | 176.925  | 9.512  |
| lh_parsopercularis_area          | ASD     | 292 | 1699.05 | 332.715  | 19.471 |
|                                  | non-ASD | 346 | 1754.55 | 313.283  | 16.842 |
| lh_parsorbitalis_area            | ASD     | 292 | 631.90  | 124.714  | 7.298  |
|                                  | non-ASD | 346 | 649.67  | 101.866  | 5.476  |
| lh_parstriangularis_area         | ASD     | 292 | 1325.19 | 260.120  | 15.222 |
|                                  | non-ASD | 346 | 1362.81 | 228.642  | 12.292 |
| lh_pericalcarine_area            | ASD     | 292 | 1273.70 | 288.992  | 16.912 |
|                                  | non-ASD | 346 | 1360.00 | 266.864  | 14.347 |
| lh_postcentral_area              | ASD     | 292 | 4372.71 | 702.600  | 41.117 |
|                                  | non-ASD | 346 | 4397.41 | 588.489  | 31.637 |
| lh_posteriorcingulate_area       | ASD     | 292 | 1263.37 | 223.498  | 13.079 |
|                                  | non-ASD | 346 | 1263.33 | 195.816  | 10.527 |
| lh_precentral_area               | ASD     | 292 | 4878.15 | 721.362  | 42.215 |
|                                  | non-ASD | 346 | 4931.29 | 597.590  | 32.127 |
| lh_precuneus_area                | ASD     | 292 | 3926.82 | 661.470  | 38.710 |
|                                  | non-ASD | 346 | 3986.48 | 549.626  | 29.548 |
| lh_rostralanteriorcingulate_area | ASD     | 292 | 768.55  | 205.920  | 12.051 |
|                                  | non-ASD | 346 | 819.85  | 167.818  | 9.022  |
| lh_rostralmiddlefrontal_area     | ASD     | 292 | 5828.44 | 1112.457 | 65.102 |
|                                  | non-ASD | 346 | 6035.27 | 917.523  | 49.326 |
| lh_superiorfrontal_area          | ASD     | 292 | 7333.87 | 1195.981 | 69.989 |
|                                  | non-ASD | 346 | 7569.56 | 979.610  | 52.664 |
| lh_superiorparietal_area         | ASD     | 292 | 5582.90 | 921.625  | 53.934 |
|                                  | non-ASD | 346 | 5684.21 | 707.529  | 38.037 |

|                                     |         |     |           |            |          |
|-------------------------------------|---------|-----|-----------|------------|----------|
| lh_superiortemporal_area            | ASD     | 292 | 3852.12   | 662.322    | 38.759   |
|                                     | non-ASD | 346 | 3899.35   | 572.609    | 30.784   |
| lh_supramarginal_area               | ASD     | 292 | 4104.42   | 705.779    | 41.303   |
|                                     | non-ASD | 346 | 4151.16   | 688.924    | 37.037   |
| lh_frontalpole_area                 | ASD     | 292 | 226.49    | 45.337     | 2.653    |
|                                     | non-ASD | 346 | 225.34    | 41.319     | 2.221    |
| lh_temporalpole_area                | ASD     | 292 | 477.53    | 87.233     | 5.105    |
|                                     | non-ASD | 346 | 488.98    | 81.122     | 4.361    |
| lh_transversetemporal_area          | ASD     | 292 | 478.30    | 99.272     | 5.809    |
|                                     | non-ASD | 346 | 468.47    | 79.282     | 4.262    |
| lh_insula_area                      | ASD     | 292 | 2117.91   | 332.472    | 19.456   |
|                                     | non-ASD | 346 | 2135.38   | 307.382    | 16.525   |
| lh_WhiteSurfArea_area               | ASD     | 292 | 85706.570 | 12474.8102 | 730.0331 |
|                                     | non-ASD | 346 | 87999.177 | 10048.6016 | 540.2162 |
| lh_bankssts_meancurv                | ASD     | 292 | .12828    | .022119    | .001294  |
|                                     | non-ASD | 346 | .12247    | .015602    | .000839  |
| lh_caudalanteriorcingulate_meancurv | ASD     | 292 | .15160    | .021401    | .001252  |
|                                     | non-ASD | 346 | .15186    | .018671    | .001004  |
| lh_caudalmiddlefrontal_meancurv     | ASD     | 292 | .15080    | .022774    | .001333  |
|                                     | non-ASD | 346 | .14272    | .017864    | .000960  |
| lh_cuneus_meancurv                  | ASD     | 292 | .18958    | .029177    | .001707  |
|                                     | non-ASD | 346 | .18068    | .017001    | .000914  |
| lh_entorhinal_meancurv              | ASD     | 292 | .18651    | .051244    | .002999  |
|                                     | non-ASD | 346 | .17658    | .038700    | .002081  |
| lh_fusiform_meancurv                | ASD     | 292 | .17054    | .024791    | .001451  |
|                                     | non-ASD | 346 | .15963    | .016583    | .000891  |
| lh_inferiorparietal_meancurv        | ASD     | 292 | .15958    | .026157    | .001531  |
|                                     | non-ASD | 346 | .14983    | .014992    | .000806  |
| lh_inferiortemporal_meancurv        | ASD     | 292 | .17013    | .022752    | .001331  |
|                                     | non-ASD | 346 | .16003    | .016530    | .000889  |
| lh_isthmuscingulate_meancurv        | ASD     | 292 | .16348    | .017590    | .001029  |
|                                     | non-ASD | 346 | .15920    | .014072    | .000757  |
| lh_lateraloccipital_meancurv        | ASD     | 292 | .17752    | .025021    | .001464  |
|                                     | non-ASD | 346 | .16545    | .016940    | .000911  |
| lh_lateralorbitofrontal_meancurv    | ASD     | 292 | .17426    | .022718    | .001329  |
|                                     | non-ASD | 346 | .16830    | .014378    | .000773  |
| lh_lingual_meancurv                 | ASD     | 292 | .18631    | .025331    | .001482  |
|                                     | non-ASD | 346 | .17645    | .018750    | .001008  |
| lh_medialorbitofrontal_meancurv     | ASD     | 292 | .17190    | .024437    | .001430  |
|                                     | non-ASD | 346 | .16557    | .016145    | .000868  |
| lh_middletemporal_meancurv          | ASD     | 292 | .16844    | .024198    | .001416  |
|                                     | non-ASD | 346 | .15926    | .017729    | .000953  |
| lh_parahippocampal_meancurv         | ASD     | 292 | .15009    | .032860    | .001923  |
|                                     | non-ASD | 346 | .14192    | .027908    | .001500  |
| lh_paracentral_meancurv             | ASD     | 292 | .14705    | .026156    | .001531  |
|                                     | non-ASD | 346 | .13790    | .019408    | .001043  |
| lh_parsopercularis_meancurv         | ASD     | 292 | .15490    | .023103    | .001352  |
|                                     | non-ASD | 346 | .14626    | .015509    | .000834  |
| lh_parsorbitalis_meancurv           | ASD     | 292 | .19267    | .029242    | .001711  |
|                                     | non-ASD | 346 | .18334    | .024206    | .001301  |

|                                      |         |     |        |         |         |
|--------------------------------------|---------|-----|--------|---------|---------|
| lh_parstriangularis_meancurv         | ASD     | 292 | .15898 | .026887 | .001573 |
|                                      | non-ASD | 346 | .15128 | .017381 | .000934 |
| lh_pericalcarine_meancurv            | ASD     | 292 | .17394 | .034392 | .002013 |
|                                      | non-ASD | 346 | .16318 | .019899 | .001070 |
| lh_postcentral_meancurv              | ASD     | 292 | .16048 | .028358 | .001660 |
|                                      | non-ASD | 346 | .14936 | .021049 | .001132 |
| lh_posteriorcingulate_meancurv       | ASD     | 292 | .16414 | .016527 | .000967 |
|                                      | non-ASD | 346 | .16158 | .015537 | .000835 |
| lh_precentral_meancurv               | ASD     | 292 | .14781 | .024991 | .001462 |
|                                      | non-ASD | 346 | .13824 | .019235 | .001034 |
| lh_precuneus_meancurv                | ASD     | 292 | .15634 | .018234 | .001067 |
|                                      | non-ASD | 346 | .15105 | .012597 | .000677 |
| lh_rostralanteriorcingulate_meancurv | ASD     | 292 | .16764 | .023252 | .001361 |
|                                      | non-ASD | 346 | .16716 | .017248 | .000927 |
| lh_rostralmiddlefrontal_meancurv     | ASD     | 292 | .17509 | .020181 | .001181 |
|                                      | non-ASD | 346 | .16790 | .014732 | .000792 |
| lh_superiorfrontal_meancurv          | ASD     | 292 | .16378 | .020629 | .001207 |
|                                      | non-ASD | 346 | .15616 | .015356 | .000826 |
| lh_superiorparietal_meancurv         | ASD     | 292 | .15912 | .026517 | .001552 |
|                                      | non-ASD | 346 | .15025 | .016979 | .000913 |
| lh_superiortemporal_meancurv         | ASD     | 292 | .14992 | .027834 | .001629 |
|                                      | non-ASD | 346 | .13928 | .020019 | .001076 |
| lh_supramarginal_meancurv            | ASD     | 292 | .16163 | .021729 | .001272 |
|                                      | non-ASD | 346 | .15418 | .014670 | .000789 |
| lh_frontalpole_meancurv              | ASD     | 292 | .23634 | .035017 | .002049 |
|                                      | non-ASD | 346 | .22789 | .032359 | .001740 |
| lh_temporalpole_meancurv             | ASD     | 292 | .21352 | .050234 | .002940 |
|                                      | non-ASD | 346 | .20136 | .039003 | .002097 |
| lh_transversetemporal_meancurv       | ASD     | 292 | .16469 | .025878 | .001514 |
|                                      | non-ASD | 346 | .15689 | .021367 | .001149 |
| lh_insula_meancurv                   | ASD     | 292 | .13133 | .021736 | .001272 |
|                                      | non-ASD | 346 | .12733 | .016016 | .000861 |
| rh_bankssts_meancurv                 | ASD     | 292 | .12931 | .024824 | .001453 |
|                                      | non-ASD | 346 | .12505 | .014624 | .000786 |
| rh_caudalanteriorcingulate_meancurv  | ASD     | 292 | .15583 | .020585 | .001205 |
|                                      | non-ASD | 346 | .15526 | .015121 | .000813 |
| rh_caudalmiddlefrontal_meancurv      | ASD     | 292 | .15300 | .026467 | .001549 |
|                                      | non-ASD | 346 | .14353 | .018144 | .000975 |
| rh_cuneus_meancurv                   | ASD     | 292 | .19250 | .035997 | .002107 |
|                                      | non-ASD | 346 | .18364 | .020449 | .001099 |
| rh_entorhinal_meancurv               | ASD     | 292 | .19536 | .053333 | .003121 |
|                                      | non-ASD | 346 | .18236 | .038380 | .002063 |
| rh_fusiform_meancurv                 | ASD     | 292 | .16631 | .024400 | .001428 |
|                                      | non-ASD | 346 | .15840 | .016458 | .000885 |
| rh_inferiorparietal_meancurv         | ASD     | 292 | .16122 | .024515 | .001435 |
|                                      | non-ASD | 346 | .15317 | .014401 | .000774 |
| rh_inferiortemporal_meancurv         | ASD     | 292 | .16980 | .022254 | .001302 |
|                                      | non-ASD | 346 | .16217 | .016818 | .000904 |
| rh_isthmuscingulate_meancurv         | ASD     | 292 | .16200 | .023516 | .001376 |
|                                      | non-ASD | 346 | .15837 | .013773 | .000740 |



|                                      |         |     |        |         |         |
|--------------------------------------|---------|-----|--------|---------|---------|
| rh_lateraloccipital_meancurv         | ASD     | 292 | .17670 | .022077 | .001292 |
|                                      | non-ASD | 346 | .16707 | .015566 | .000837 |
| rh_lateralorbitofrontal_meancurv     | ASD     | 292 | .17433 | .022319 | .001306 |
|                                      | non-ASD | 346 | .16827 | .014968 | .000805 |
| rh_lingual_meancurv                  | ASD     | 292 | .18721 | .022928 | .001342 |
|                                      | non-ASD | 346 | .17902 | .018244 | .000981 |
| rh_medialorbitofrontal_meancurv      | ASD     | 292 | .17299 | .019148 | .001121 |
|                                      | non-ASD | 346 | .16873 | .015423 | .000829 |
| rh_middletemporal_meancurv           | ASD     | 292 | .16534 | .022878 | .001339 |
|                                      | non-ASD | 346 | .15812 | .017509 | .000941 |
| rh_parahippocampal_meancurv          | ASD     | 292 | .14735 | .031438 | .001840 |
|                                      | non-ASD | 346 | .14097 | .026896 | .001446 |
| rh_paracentral_meancurv              | ASD     | 292 | .14573 | .026221 | .001534 |
|                                      | non-ASD | 346 | .13850 | .017674 | .000950 |
| rh_parsopercularis_meancurv          | ASD     | 292 | .15524 | .020407 | .001194 |
|                                      | non-ASD | 346 | .14830 | .015717 | .000845 |
| rh_parsorbitalis_meancurv            | ASD     | 292 | .19013 | .028702 | .001680 |
|                                      | non-ASD | 346 | .17904 | .022541 | .001212 |
| rh_parstriangularis_meancurv         | ASD     | 292 | .16413 | .027925 | .001634 |
|                                      | non-ASD | 346 | .15345 | .016531 | .000889 |
| rh_pericalcarine_meancurv            | ASD     | 292 | .17805 | .036747 | .002150 |
|                                      | non-ASD | 346 | .16453 | .022088 | .001187 |
| rh_postcentral_meancurv              | ASD     | 292 | .15735 | .029312 | .001715 |
|                                      | non-ASD | 346 | .14742 | .022849 | .001228 |
| rh_posteriorcingulate_meancurv       | ASD     | 292 | .16363 | .019066 | .001116 |
|                                      | non-ASD | 346 | .15986 | .011957 | .000643 |
| rh_precentral_meancurv               | ASD     | 292 | .14798 | .025386 | .001486 |
|                                      | non-ASD | 346 | .13895 | .019350 | .001040 |
| rh_precuneus_meancurv                | ASD     | 292 | .15574 | .019825 | .001160 |
|                                      | non-ASD | 346 | .15067 | .012345 | .000664 |
| rh_rostralanteriorcingulate_meancurv | ASD     | 292 | .16369 | .029932 | .001752 |
|                                      | non-ASD | 346 | .16405 | .019134 | .001029 |
| rh_rostralmiddlefrontal_meancurv     | ASD     | 292 | .17503 | .020387 | .001193 |
|                                      | non-ASD | 346 | .16805 | .015260 | .000820 |
| rh_superiorfrontal_meancurv          | ASD     | 292 | .16420 | .020140 | .001179 |
|                                      | non-ASD | 346 | .15631 | .014931 | .000803 |
| rh_superiorparietal_meancurv         | ASD     | 292 | .16057 | .026203 | .001533 |
|                                      | non-ASD | 346 | .15194 | .018521 | .000996 |
| rh_superiortemporal_meancurv         | ASD     | 292 | .14905 | .028987 | .001696 |
|                                      | non-ASD | 346 | .13949 | .020851 | .001121 |
| rh_supramarginal_meancurv            | ASD     | 292 | .15915 | .025324 | .001482 |
|                                      | non-ASD | 346 | .15240 | .015918 | .000856 |
| rh_frontalpole_meancurv              | ASD     | 292 | .23687 | .034068 | .001994 |
|                                      | non-ASD | 346 | .22582 | .027817 | .001495 |
| rh_temporalpole_meancurv             | ASD     | 292 | .21901 | .045470 | .002661 |
|                                      | non-ASD | 346 | .21032 | .037805 | .002032 |
| rh_transversetemporal_meancurv       | ASD     | 292 | .16987 | .028993 | .001697 |
|                                      | non-ASD | 346 | .16127 | .022886 | .001230 |
| rh_insula_meancurv                   | ASD     | 292 | .14555 | .020450 | .001197 |
|                                      | non-ASD | 346 | .14222 | .015939 | .000857 |



|                                       |         |     |         |         |         |
|---------------------------------------|---------|-----|---------|---------|---------|
| rh_bankssts_thickness                 | ASD     | 292 | 2.74675 | .340949 | .019953 |
|                                       | non-ASD | 346 | 2.79131 | .243884 | .013111 |
| rh_caudalanteriorcingulate_thickness  | ASD     | 292 | 2.75257 | .381911 | .022350 |
|                                       | non-ASD | 346 | 2.84985 | .332313 | .017865 |
| rh_caudalmiddlefrontal_thickness      | ASD     | 292 | 2.70198 | .274832 | .016083 |
|                                       | non-ASD | 346 | 2.72380 | .225636 | .012130 |
| rh_cuneus_thickness                   | ASD     | 292 | 2.20035 | .216800 | .012687 |
|                                       | non-ASD | 346 | 2.17569 | .206941 | .011125 |
| rh_entorhinal_thickness               | ASD     | 292 | 3.19384 | .615180 | .036001 |
|                                       | non-ASD | 346 | 3.29209 | .479775 | .025793 |
| rh_fusiform_thickness                 | ASD     | 292 | 2.80632 | .313916 | .018371 |
|                                       | non-ASD | 346 | 2.88321 | .247900 | .013327 |
| rh_inferiorparietal_thickness         | ASD     | 292 | 2.72348 | .235293 | .013769 |
|                                       | non-ASD | 346 | 2.74535 | .191604 | .010301 |
| rh_inferiortemporal_thickness         | ASD     | 292 | 2.82902 | .345276 | .020206 |
|                                       | non-ASD | 346 | 2.89010 | .281348 | .015125 |
| rh_isthmuscingulate_thickness         | ASD     | 292 | 2.70758 | .292801 | .017135 |
|                                       | non-ASD | 346 | 2.77035 | .240983 | .012955 |
| rh_lateraloccipital_thickness         | ASD     | 292 | 2.34960 | .180533 | .010565 |
|                                       | non-ASD | 346 | 2.33876 | .160057 | .008605 |
| rh_lateralorbitofrontal_thickness     | ASD     | 292 | 2.96599 | .318724 | .018652 |
|                                       | non-ASD | 346 | 2.98245 | .245651 | .013206 |
| rh_lingual_thickness                  | ASD     | 292 | 2.35932 | .199451 | .011672 |
|                                       | non-ASD | 346 | 2.34940 | .182587 | .009816 |
| rh_medialorbitofrontal_thickness      | ASD     | 292 | 2.78223 | .276421 | .016176 |
|                                       | non-ASD | 346 | 2.75229 | .210699 | .011327 |
| rh_middletemporal_thickness           | ASD     | 292 | 2.99257 | .367324 | .021496 |
|                                       | non-ASD | 346 | 3.07316 | .326588 | .017558 |
| rh_parahippocampal_thickness          | ASD     | 292 | 2.76467 | .435583 | .025491 |
|                                       | non-ASD | 346 | 2.89838 | .399864 | .021497 |
| rh_paracentral_thickness              | ASD     | 292 | 2.68635 | .289849 | .016962 |
|                                       | non-ASD | 346 | 2.69029 | .214806 | .011548 |
| rh_parsopercularis_thickness          | ASD     | 292 | 2.79505 | .266488 | .015595 |
|                                       | non-ASD | 346 | 2.82413 | .207050 | .011131 |
| rh_parsorbitalis_thickness            | ASD     | 292 | 3.01201 | .390371 | .022845 |
|                                       | non-ASD | 346 | 3.02593 | .304370 | .016363 |
| rh_parstriangularis_thickness         | ASD     | 292 | 2.74582 | .286195 | .016748 |
|                                       | non-ASD | 346 | 2.75321 | .225223 | .012108 |
| rh_pericalcarine_thickness            | ASD     | 292 | 1.93245 | .240454 | .014071 |
|                                       | non-ASD | 346 | 1.89146 | .216140 | .011620 |
| rh_postcentral_thickness              | ASD     | 292 | 2.25123 | .192173 | .011246 |
|                                       | non-ASD | 346 | 2.23790 | .165247 | .008884 |
| rh_posteriorcingulate_thickness       | ASD     | 292 | 2.78265 | .259850 | .015207 |
|                                       | non-ASD | 346 | 2.82219 | .222290 | .011950 |
| rh_precentral_thickness               | ASD     | 292 | 2.63374 | .224343 | .013129 |
|                                       | non-ASD | 346 | 2.66199 | .191018 | .010269 |
| rh_precuneus_thickness                | ASD     | 292 | 2.71859 | .216320 | .012659 |
|                                       | non-ASD | 346 | 2.72717 | .175688 | .009445 |
| rh_rostralanteriorcingulate_thickness | ASD     | 292 | 2.99259 | .419611 | .024556 |
|                                       | non-ASD | 346 | 3.12760 | .347269 | .018669 |

|                                      |         |     |           |           |           |
|--------------------------------------|---------|-----|-----------|-----------|-----------|
| rh_rostralmiddlefrontal_thickness    | ASD     | 292 | 2.68353   | .279180   | .016338   |
|                                      | non-ASD | 346 | 2.64942   | .232383   | .012493   |
| rh_superiorfrontal_thickness         | ASD     | 292 | 2.99455   | .301522   | .017645   |
|                                      | non-ASD | 346 | 3.00287   | .246310   | .013242   |
| rh_superiorparietal_thickness        | ASD     | 292 | 2.42308   | .196660   | .011509   |
|                                      | non-ASD | 346 | 2.42419   | .166493   | .008951   |
| rh_superiortemporal_thickness        | ASD     | 292 | 2.93099   | .332418   | .019453   |
|                                      | non-ASD | 346 | 2.99540   | .273007   | .014677   |
| rh_supramarginal_thickness           | ASD     | 292 | 2.77162   | .266786   | .015612   |
|                                      | non-ASD | 346 | 2.79543   | .205316   | .011038   |
| rh_frontalpole_thickness             | ASD     | 292 | 3.14643   | .480283   | .028106   |
|                                      | non-ASD | 346 | 3.07129   | .414665   | .022293   |
| rh_temporalpole_thickness            | ASD     | 292 | 3.37578   | .585549   | .034267   |
|                                      | non-ASD | 346 | 3.49336   | .515135   | .027694   |
| rh_transversetemporal_thickness      | ASD     | 292 | 2.64786   | .306990   | .017965   |
|                                      | non-ASD | 346 | 2.68806   | .281876   | .015154   |
| rh_insula_thickness                  | ASD     | 292 | 3.18542   | .306532   | .017938   |
|                                      | non-ASD | 346 | 3.26698   | .232879   | .012520   |
| rh_MeanThickness_thickness           | ASD     | 292 | 2.6998914 | .19507874 | .01141612 |
|                                      | non-ASD | 346 | 2.7215153 | .14347324 | .00771317 |
| lh_bankssts_thickness                | ASD     | 292 | 2.78295   | .333336   | .019507   |
|                                      | non-ASD | 346 | 2.83285   | .261129   | .014038   |
| lh_caudalanteriorcingulate_thickness | ASD     | 292 | 2.71428   | .426586   | .024964   |
|                                      | non-ASD | 346 | 2.81910   | .332603   | .017881   |
| lh_caudalmiddlefrontal_thickness     | ASD     | 292 | 2.71760   | .270214   | .015813   |
|                                      | non-ASD | 346 | 2.72933   | .236824   | .012732   |
| lh_cuneus_thickness                  | ASD     | 292 | 2.21090   | .222314   | .013010   |
|                                      | non-ASD | 346 | 2.17011   | .211321   | .011361   |
| lh_entorhinal_thickness              | ASD     | 292 | 3.18701   | .649850   | .038030   |
|                                      | non-ASD | 346 | 3.30267   | .543781   | .029234   |
| lh_fusiform_thickness                | ASD     | 292 | 2.82065   | .292095   | .017094   |
|                                      | non-ASD | 346 | 2.89304   | .226508   | .012177   |
| lh_inferiorparietal_thickness        | ASD     | 292 | 2.71798   | .234375   | .013716   |
|                                      | non-ASD | 346 | 2.74172   | .183673   | .009874   |
| lh_inferiortemporal_thickness        | ASD     | 292 | 2.85668   | .334358   | .019567   |
|                                      | non-ASD | 346 | 2.91443   | .249911   | .013435   |
| lh_isthmuscingulate_thickness        | ASD     | 292 | 2.72249   | .270523   | .015831   |
|                                      | non-ASD | 346 | 2.73238   | .259167   | .013933   |
| lh_lateraloccipital_thickness        | ASD     | 292 | 2.37202   | .179857   | .010525   |
|                                      | non-ASD | 346 | 2.35545   | .166486   | .008950   |
| lh_lateralorbitofrontal_thickness    | ASD     | 292 | 2.93325   | .313432   | .018342   |
|                                      | non-ASD | 346 | 2.92583   | .240944   | .012953   |
| lh_lingual_thickness                 | ASD     | 292 | 2.35822   | .189734   | .011103   |
|                                      | non-ASD | 346 | 2.35474   | .186817   | .010043   |
| lh_medialorbitofrontal_thickness     | ASD     | 292 | 2.75103   | .288188   | .016865   |
|                                      | non-ASD | 346 | 2.73903   | .235118   | .012640   |
| lh_middletemporal_thickness          | ASD     | 292 | 3.01500   | .362691   | .021225   |
|                                      | non-ASD | 346 | 3.07720   | .302519   | .016264   |
| lh_parahippocampal_thickness         | ASD     | 292 | 2.73738   | .404816   | .023690   |
|                                      | non-ASD | 346 | 2.89018   | .330701   | .017779   |

|                                       |         |     |           |           |           |
|---------------------------------------|---------|-----|-----------|-----------|-----------|
| lh_paracentral_thickness              | ASD     | 292 | 2.69495   | .237433   | .013895   |
|                                       | non-ASD | 346 | 2.69764   | .220592   | .011859   |
| lh_parsopercularis_thickness          | ASD     | 292 | 2.81097   | .266224   | .015580   |
|                                       | non-ASD | 346 | 2.83755   | .209546   | .011265   |
| lh_parsorbitalis_thickness            | ASD     | 292 | 3.03342   | .377927   | .022117   |
|                                       | non-ASD | 346 | 3.01351   | .312136   | .016781   |
| lh_parstriangularis_thickness         | ASD     | 292 | 2.77395   | .297805   | .017428   |
|                                       | non-ASD | 346 | 2.77365   | .232199   | .012483   |
| lh_pericalcarine_thickness            | ASD     | 292 | 1.91261   | .236148   | .013820   |
|                                       | non-ASD | 346 | 1.87487   | .213112   | .011457   |
| lh_postcentral_thickness              | ASD     | 292 | 2.25008   | .177065   | .010362   |
|                                       | non-ASD | 346 | 2.22864   | .179173   | .009632   |
| lh_posteriorcingulate_thickness       | ASD     | 292 | 2.75247   | .270844   | .015850   |
|                                       | non-ASD | 346 | 2.79479   | .233768   | .012567   |
| lh_precentral_thickness               | ASD     | 292 | 2.62495   | .225176   | .013177   |
|                                       | non-ASD | 346 | 2.64933   | .200343   | .010771   |
| lh_precuneus_thickness                | ASD     | 292 | 2.72187   | .215809   | .012629   |
|                                       | non-ASD | 346 | 2.71165   | .198154   | .010653   |
| lh_rostralanteriorcingulate_thickness | ASD     | 292 | 2.96995   | .418040   | .024464   |
|                                       | non-ASD | 346 | 3.06172   | .339406   | .018247   |
| lh_rostralmiddlefrontal_thickness     | ASD     | 292 | 2.68061   | .265817   | .015556   |
|                                       | non-ASD | 346 | 2.63865   | .220586   | .011859   |
| lh_superiorfrontal_thickness          | ASD     | 292 | 2.98967   | .292210   | .017100   |
|                                       | non-ASD | 346 | 3.00086   | .225085   | .012101   |
| lh_superiorparietal_thickness         | ASD     | 292 | 2.42233   | .194418   | .011377   |
|                                       | non-ASD | 346 | 2.40144   | .169350   | .009104   |
| lh_superiortemporal_thickness         | ASD     | 292 | 2.95259   | .338956   | .019836   |
|                                       | non-ASD | 346 | 2.99199   | .268814   | .014452   |
| lh_supramarginal_thickness            | ASD     | 292 | 2.78046   | .263790   | .015437   |
|                                       | non-ASD | 346 | 2.80046   | .208796   | .011225   |
| lh_frontalpole_thickness              | ASD     | 292 | 3.09566   | .450309   | .026352   |
|                                       | non-ASD | 346 | 3.05241   | .431167   | .023180   |
| lh_temporalpole_thickness             | ASD     | 292 | 3.40903   | .607627   | .035559   |
|                                       | non-ASD | 346 | 3.49037   | .576451   | .030990   |
| lh_transversetemporal_thickness       | ASD     | 292 | 2.67158   | .317887   | .018603   |
|                                       | non-ASD | 346 | 2.71819   | .290973   | .015643   |
| lh_insula_thickness                   | ASD     | 292 | 3.18019   | .315928   | .018488   |
|                                       | non-ASD | 346 | 3.25665   | .227045   | .012206   |
| lh_MeanThickness_thickness            | ASD     | 292 | 2.7032923 | .19232972 | .01125525 |
|                                       | non-ASD | 346 | 2.7157634 | .14577674 | .00783701 |
| lh_bankssts_volume                    | ASD     | 292 | 2845.77   | 718.477   | 42.046    |
|                                       | non-ASD | 346 | 2947.22   | 623.891   | 33.541    |
| lh_caudalanteriorcingulate_volume     | ASD     | 292 | 2196.22   | 691.409   | 40.462    |
|                                       | non-ASD | 346 | 2347.63   | 569.774   | 30.631    |
| lh_caudalmiddlefrontal_volume         | ASD     | 292 | 7286.15   | 1844.058  | 107.915   |
|                                       | non-ASD | 346 | 7419.81   | 1431.853  | 76.977    |
| lh_cuneus_volume                      | ASD     | 292 | 3725.84   | 804.339   | 47.070    |
|                                       | non-ASD | 346 | 3694.64   | 703.069   | 37.797    |
| lh_entorhinal_volume                  | ASD     | 292 | 1619.48   | 530.455   | 31.043    |
|                                       | non-ASD | 346 | 1739.77   | 528.633   | 28.419    |

|                                    |         |     |          |          |         |
|------------------------------------|---------|-----|----------|----------|---------|
| lh_fusiform_volume                 | ASD     | 292 | 10828.84 | 2552.200 | 149.356 |
|                                    | non-ASD | 346 | 11319.52 | 2221.262 | 119.416 |
| lh_inferiorparietal_volume         | ASD     | 292 | 17470.70 | 3762.779 | 220.200 |
|                                    | non-ASD | 346 | 18036.69 | 3380.740 | 181.750 |
| lh_inferiortemporal_volume         | ASD     | 292 | 11398.80 | 3096.837 | 181.229 |
|                                    | non-ASD | 346 | 11921.99 | 2526.718 | 135.837 |
| lh_isthmuscingulate_volume         | ASD     | 292 | 3230.97  | 725.358  | 42.448  |
|                                    | non-ASD | 346 | 3221.95  | 641.945  | 34.511  |
| lh_lateraloccipital_volume         | ASD     | 292 | 13328.91 | 2353.503 | 137.728 |
|                                    | non-ASD | 346 | 13207.65 | 1983.450 | 106.631 |
| lh_lateralorbitofrontal_volume     | ASD     | 292 | 8406.24  | 1921.379 | 112.440 |
|                                    | non-ASD | 346 | 8866.77  | 1368.082 | 73.549  |
| lh_lingual_volume                  | ASD     | 292 | 7766.41  | 1729.390 | 101.205 |
|                                    | non-ASD | 346 | 8128.93  | 1478.306 | 79.474  |
| lh_medialorbitofrontal_volume      | ASD     | 292 | 5774.80  | 1195.898 | 69.985  |
|                                    | non-ASD | 346 | 6014.26  | 953.034  | 51.235  |
| lh_middletemporal_volume           | ASD     | 292 | 12935.82 | 3234.914 | 189.309 |
|                                    | non-ASD | 346 | 13565.36 | 2869.723 | 154.277 |
| lh_parahippocampal_volume          | ASD     | 292 | 2311.79  | 568.810  | 33.287  |
|                                    | non-ASD | 346 | 2431.64  | 500.709  | 26.918  |
| lh_paracentral_volume              | ASD     | 292 | 4682.07  | 954.092  | 55.834  |
|                                    | non-ASD | 346 | 4599.55  | 726.865  | 39.077  |
| lh_parsopercularis_volume          | ASD     | 292 | 5092.60  | 1210.132 | 70.818  |
|                                    | non-ASD | 346 | 5161.06  | 1005.685 | 54.066  |
| lh_parsorbitalis_volume            | ASD     | 292 | 3023.21  | 745.085  | 43.603  |
|                                    | non-ASD | 346 | 3109.71  | 627.460  | 33.732  |
| lh_parstriangularis_volume         | ASD     | 292 | 4968.76  | 1227.155 | 71.814  |
|                                    | non-ASD | 346 | 5106.88  | 1127.222 | 60.600  |
| lh_pericalcarine_volume            | ASD     | 292 | 2476.65  | 581.896  | 34.053  |
|                                    | non-ASD | 346 | 2569.32  | 547.891  | 29.455  |
| lh_postcentral_volume              | ASD     | 292 | 11197.93 | 1960.787 | 114.746 |
|                                    | non-ASD | 346 | 11202.07 | 1763.338 | 94.798  |
| lh_posteriorcingulate_volume       | ASD     | 292 | 3882.49  | 821.695  | 48.086  |
|                                    | non-ASD | 346 | 4049.90  | 707.465  | 38.034  |
| lh_precentral_volume               | ASD     | 292 | 14928.66 | 2630.740 | 153.952 |
|                                    | non-ASD | 346 | 15091.16 | 2134.373 | 114.745 |
| lh_precuneus_volume                | ASD     | 292 | 12624.26 | 2310.204 | 135.194 |
|                                    | non-ASD | 346 | 12550.85 | 1889.120 | 101.560 |
| lh_rostralanteriorcingulate_volume | ASD     | 292 | 2343.68  | 775.123  | 45.361  |
|                                    | non-ASD | 346 | 2587.03  | 684.413  | 36.794  |
| lh_rostralmiddlefrontal_volume     | ASD     | 292 | 19839.93 | 4365.971 | 255.499 |
|                                    | non-ASD | 346 | 19967.95 | 3411.247 | 183.390 |
| lh_superiorfrontal_volume          | ASD     | 292 | 26381.15 | 4919.137 | 287.871 |
|                                    | non-ASD | 346 | 26729.90 | 3509.233 | 188.658 |
| lh_superiorparietal_volume         | ASD     | 292 | 15733.49 | 2798.166 | 163.750 |
|                                    | non-ASD | 346 | 15783.60 | 2182.426 | 117.328 |
| lh_superiortemporal_volume         | ASD     | 292 | 13437.37 | 3050.636 | 178.525 |
|                                    | non-ASD | 346 | 13514.30 | 2526.926 | 135.848 |
| lh_supramarginal_volume            | ASD     | 292 | 12959.12 | 2623.130 | 153.507 |
|                                    | non-ASD | 346 | 12971.39 | 2240.650 | 120.458 |

|                                   |         |     |          |          |         |
|-----------------------------------|---------|-----|----------|----------|---------|
| lh_frontalpole_volume             | ASD     | 292 | 1306.15  | 371.470  | 21.739  |
|                                   | non-ASD | 346 | 1262.42  | 297.197  | 15.977  |
| lh_temporalpole_volume            | ASD     | 292 | 2259.94  | 673.460  | 39.411  |
|                                   | non-ASD | 346 | 2347.91  | 639.631  | 34.387  |
| lh_transversetemporal_volume      | ASD     | 292 | 1211.81  | 345.891  | 20.242  |
|                                   | non-ASD | 346 | 1199.85  | 291.675  | 15.681  |
| lh_insula_volume                  | ASD     | 292 | 6903.30  | 1356.366 | 79.375  |
|                                   | non-ASD | 346 | 7171.12  | 1139.645 | 61.268  |
| rh_bankssts_volume                | ASD     | 292 | 2916.32  | 797.955  | 46.697  |
|                                   | non-ASD | 346 | 3013.71  | 668.688  | 35.949  |
| rh_caudalanteriorcingulate_volume | ASD     | 292 | 2093.36  | 644.773  | 37.732  |
|                                   | non-ASD | 346 | 2235.85  | 571.921  | 30.747  |
| rh_caudalmiddlefrontal_volume     | ASD     | 292 | 7320.61  | 1753.991 | 102.645 |
|                                   | non-ASD | 346 | 7540.32  | 1469.173 | 78.983  |
| rh_cuneus_volume                  | ASD     | 292 | 3619.23  | 744.006  | 43.540  |
|                                   | non-ASD | 346 | 3610.29  | 705.961  | 37.953  |
| rh_entorhinal_volume              | ASD     | 292 | 1704.97  | 538.669  | 31.523  |
|                                   | non-ASD | 346 | 1841.40  | 612.476  | 32.927  |
| rh_fusiform_volume                | ASD     | 292 | 10842.42 | 2659.041 | 155.609 |
|                                   | non-ASD | 346 | 11493.70 | 2255.655 | 121.265 |
| rh_inferiorparietal_volume        | ASD     | 292 | 16686.96 | 3566.697 | 208.725 |
|                                   | non-ASD | 346 | 16849.21 | 3075.593 | 165.345 |
| rh_inferiortemporal_volume        | ASD     | 292 | 11541.34 | 3056.412 | 178.863 |
|                                   | non-ASD | 346 | 12061.14 | 2684.699 | 144.330 |
| rh_isthmuscingulate_volume        | ASD     | 292 | 3298.21  | 695.010  | 40.672  |
|                                   | non-ASD | 346 | 3323.04  | 668.060  | 35.915  |
| rh_lateraloccipital_volume        | ASD     | 292 | 13304.16 | 2216.684 | 129.722 |
|                                   | non-ASD | 346 | 13142.20 | 2028.793 | 109.069 |
| rh_lateralorbitofrontal_volume    | ASD     | 292 | 8510.46  | 1835.146 | 107.394 |
|                                   | non-ASD | 346 | 8963.10  | 1425.673 | 76.645  |
| rh_lingual_volume                 | ASD     | 292 | 7926.55  | 1681.188 | 98.384  |
|                                   | non-ASD | 346 | 8120.50  | 1516.722 | 81.539  |
| rh_medialorbitofrontal_volume     | ASD     | 292 | 5743.62  | 1104.632 | 64.644  |
|                                   | non-ASD | 346 | 5864.68  | 888.682  | 47.776  |
| rh_middletemporal_volume          | ASD     | 292 | 12395.11 | 3104.467 | 181.675 |
|                                   | non-ASD | 346 | 13134.82 | 2699.916 | 145.148 |
| rh_parahippocampal_volume         | ASD     | 292 | 2355.17  | 540.988  | 31.659  |
|                                   | non-ASD | 346 | 2522.04  | 573.759  | 30.845  |
| rh_paracentral_volume             | ASD     | 292 | 4533.86  | 919.519  | 53.811  |
|                                   | non-ASD | 346 | 4430.11  | 750.366  | 40.340  |
| rh_parsopercularis_volume         | ASD     | 292 | 5385.37  | 1404.346 | 82.183  |
|                                   | non-ASD | 346 | 5610.06  | 1244.246 | 66.891  |
| rh_parsorbitalis_volume           | ASD     | 292 | 2855.41  | 686.606  | 40.181  |
|                                   | non-ASD | 346 | 2914.98  | 613.695  | 32.992  |
| rh_parstriangularis_volume        | ASD     | 292 | 4727.29  | 1168.890 | 68.404  |
|                                   | non-ASD | 346 | 4859.65  | 1000.373 | 53.780  |
| rh_pericalcarine_volume           | ASD     | 292 | 2420.99  | 559.213  | 32.725  |
|                                   | non-ASD | 346 | 2495.72  | 528.231  | 28.398  |
| rh_postcentral_volume             | ASD     | 292 | 11539.65 | 2226.533 | 130.298 |
|                                   | non-ASD | 346 | 11441.52 | 1851.235 | 99.523  |

|                                    |         |     |           |           |          |
|------------------------------------|---------|-----|-----------|-----------|----------|
| rh_posteriorcingulate_volume       | ASD     | 292 | 3980.35   | 853.102   | 49.924   |
|                                    | non-ASD | 346 | 3979.27   | 686.153   | 36.888   |
| rh_precentral_volume               | ASD     | 292 | 14953.46  | 2484.006  | 145.365  |
|                                    | non-ASD | 346 | 15034.80  | 1983.603  | 106.639  |
| rh_precuneus_volume                | ASD     | 292 | 12376.39  | 2297.897  | 134.474  |
|                                    | non-ASD | 346 | 12470.14  | 1811.245  | 97.373   |
| rh_rostralanteriorcingulate_volume | ASD     | 292 | 2527.75   | 854.665   | 50.015   |
|                                    | non-ASD | 346 | 2805.60   | 698.577   | 37.556   |
| rh_rostralmiddlefrontal_volume     | ASD     | 292 | 19658.79  | 4268.575  | 249.799  |
|                                    | non-ASD | 346 | 19868.90  | 3236.985  | 174.021  |
| rh_superiorfrontal_volume          | ASD     | 292 | 26554.52  | 4910.859  | 287.386  |
|                                    | non-ASD | 346 | 26963.70  | 3438.678  | 184.864  |
| rh_superiorparietal_volume         | ASD     | 292 | 15984.40  | 2861.596  | 167.462  |
|                                    | non-ASD | 346 | 16072.54  | 2322.830  | 124.876  |
| rh_superiortemporal_volume         | ASD     | 292 | 13392.12  | 3079.802  | 180.232  |
|                                    | non-ASD | 346 | 13815.16  | 2658.518  | 142.923  |
| rh_supramarginal_volume            | ASD     | 292 | 13065.03  | 2723.782  | 159.397  |
|                                    | non-ASD | 346 | 13425.45  | 2521.410  | 135.552  |
| rh_frontalpole_volume              | ASD     | 292 | 1210.40   | 338.091   | 19.785   |
|                                    | non-ASD | 346 | 1149.08   | 308.413   | 16.580   |
| rh_temporalpole_volume             | ASD     | 292 | 2357.83   | 725.249   | 42.442   |
|                                    | non-ASD | 346 | 2469.12   | 628.763   | 33.802   |
| rh_transversetemporal_volume       | ASD     | 292 | 1304.08   | 379.636   | 22.217   |
|                                    | non-ASD | 346 | 1326.13   | 361.071   | 19.411   |
| rh_insula_volume                   | ASD     | 292 | 6971.18   | 1236.960  | 72.388   |
|                                    | non-ASD | 346 | 7209.34   | 1159.759  | 62.349   |
| LeftLateralVentricle               | ASD     | 292 | 5422.339  | 3256.4011 | 190.5665 |
|                                    | non-ASD | 346 | 4910.513  | 2709.3805 | 145.6572 |
| LeftInfLatVent                     | ASD     | 292 | 367.604   | 223.9621  | 13.1064  |
|                                    | non-ASD | 346 | 343.202   | 245.5282  | 13.1997  |
| LeftCerebellumWhiteMatter          | ASD     | 292 | 13806.163 | 2337.7094 | 136.8041 |
|                                    | non-ASD | 346 | 13965.010 | 1925.7537 | 103.5292 |
| LeftCerebellumCortex               | ASD     | 292 | 53295.207 | 7024.6394 | 411.0859 |
|                                    | non-ASD | 346 | 53938.648 | 6064.5534 | 326.0324 |
| LeftThalamusProper                 | ASD     | 292 | 7358.084  | 809.0230  | 47.3445  |
|                                    | non-ASD | 346 | 7379.627  | 770.1110  | 41.4014  |
| LeftCaudate                        | ASD     | 292 | 4021.842  | 592.0826  | 34.6490  |
|                                    | non-ASD | 346 | 4017.018  | 525.3096  | 28.2408  |
| LeftPutamen                        | ASD     | 292 | 6696.281  | 910.2660  | 53.2693  |
|                                    | non-ASD | 346 | 6628.711  | 855.5767  | 45.9961  |
| LeftPallidum                       | ASD     | 292 | 2020.853  | 304.6637  | 17.8291  |
|                                    | non-ASD | 346 | 2027.994  | 281.1634  | 15.1154  |
| @3rdVentricle                      | ASD     | 292 | 850.200   | 283.6007  | 16.5965  |
|                                    | non-ASD | 346 | 758.388   | 210.5794  | 11.3208  |
| @4thVentricle                      | ASD     | 292 | 1866.110  | 669.4408  | 39.1761  |
|                                    | non-ASD | 346 | 1813.531  | 559.4106  | 30.0741  |
| BrainStem                          | ASD     | 292 | 18672.447 | 2356.9608 | 137.9307 |
|                                    | non-ASD | 346 | 19200.632 | 2138.5523 | 114.9693 |
| LeftHippocampus                    | ASD     | 292 | 3893.514  | 594.9633  | 34.8176  |
|                                    | non-ASD | 346 | 3909.805  | 548.3112  | 29.4774  |

|                            |         |     |           |                   |          |
|----------------------------|---------|-----|-----------|-------------------|----------|
| LeftAmygdala               | ASD     | 292 | 1471.228  | 298.7428          | 17.4826  |
|                            | non-ASD | 346 | 1502.284  | 251.0862          | 13.4985  |
| CSF                        | ASD     | 292 | 882.434   | 266.5717          | 15.5999  |
|                            | non-ASD | 346 | 855.238   | 245.6133          | 13.2043  |
| LeftAccumbensarea          | ASD     | 292 | 746.557   | 157.8516          | 9.2376   |
|                            | non-ASD | 346 | 736.838   | 149.3922          | 8.0314   |
| LeftVentralDC              | ASD     | 292 | 3580.217  | 441.2966          | 25.8249  |
|                            | non-ASD | 346 | 3573.440  | 454.1705          | 24.4164  |
| Leftvessel                 | ASD     | 292 | 66.772    | 38.3453           | 2.2440   |
|                            | non-ASD | 346 | 70.962    | 41.7587           | 2.2450   |
| Leftchoroidplexus          | ASD     | 292 | 1146.592  | 272.1642          | 15.9272  |
|                            | non-ASD | 346 | 1119.904  | 240.4935          | 12.9290  |
| RightLateralVentricle      | ASD     | 292 | 5034.518  | 3248.1602         | 190.0842 |
|                            | non-ASD | 346 | 4427.319  | 2671.5161         | 143.6216 |
| RightInfLatVent            | ASD     | 292 | 358.737   | 202.9243          | 11.8752  |
|                            | non-ASD | 346 | 330.586   | 179.4825          | 9.6490   |
| RightCerebellumWhiteMatter | ASD     | 292 | 13759.260 | 2305.9578         | 134.9460 |
|                            | non-ASD | 346 | 14058.309 | 1934.9589         | 104.0240 |
| RightCerebellumCortex      | ASD     | 292 | 53699.110 | 7582.9714         | 443.7598 |
|                            | non-ASD | 346 | 54151.384 | 6942.3995         | 373.2257 |
| RightThalamusProper        | ASD     | 292 | 7385.620  | 773.9986          | 45.2948  |
|                            | non-ASD | 346 | 7443.755  | 746.8925          | 40.1532  |
| RightCaudate               | ASD     | 292 | 4314.984  | 646.3887          | 37.8270  |
|                            | non-ASD | 346 | 4313.999  | 568.3506          | 30.5547  |
| RightPutamen               | ASD     | 292 | 6496.696  | 934.8905          | 54.7103  |
|                            | non-ASD | 346 | 6398.791  | 775.0160          | 41.6651  |
| RightPallidum              | ASD     | 292 | 1828.651  | 279.7210          | 16.3694  |
|                            | non-ASD | 346 | 1840.462  | 261.5615          | 14.0616  |
| RightHippocampus           | ASD     | 292 | 3961.382  | 551.3016          | 32.2625  |
|                            | non-ASD | 346 | 3965.521  | 472.0348          | 25.3767  |
| RightAmygdala              | ASD     | 292 | 1556.048  | 297.0313          | 17.3824  |
|                            | non-ASD | 346 | 1589.686  | 267.7775          | 14.3958  |
| RightAccumbensarea         | ASD     | 292 | 745.909   | 142.8405          | 8.3591   |
|                            | non-ASD | 346 | 735.172   | 117.7121          | 6.3282   |
| RightVentralDC             | ASD     | 292 | 3748.000  | 420.8328          | 24.6274  |
|                            | non-ASD | 346 | 3764.832  | 432.2309          | 23.2369  |
| Rightvessel                | ASD     | 292 | 73.748    | 40.8829           | 2.3925   |
|                            | non-ASD | 346 | 84.452    | 46.1353           | 2.4802   |
| Rightchoroidplexus         | ASD     | 292 | 1445.485  | 313.5606          | 18.3497  |
|                            | non-ASD | 346 | 1377.294  | 314.8898          | 16.9286  |
| @5thVentricle              | ASD     | 292 | 1.368     | 3.6267            | .2122    |
|                            | non-ASD | 346 | 1.420     | 3.7754            | .2030    |
| WMhypointensities          | ASD     | 292 | 2201.824  | 1529.7095         | 89.5195  |
|                            | non-ASD | 346 | 1737.514  | 985.2243          | 52.9660  |
| LeftWMhypointensities      | ASD     | 292 | .00       | .000 <sup>a</sup> | .000     |
|                            | non-ASD | 346 | .00       | .000 <sup>a</sup> | .000     |
| RightWMhypointensities     | ASD     | 292 | .00       | .000 <sup>a</sup> | .000     |
|                            | non-ASD | 346 | .00       | .000 <sup>a</sup> | .000     |
| nonWMhypointensities       | ASD     | 292 | 17.818    | 18.6645           | 1.0923   |
|                            | non-ASD | 346 | 15.905    | 16.2172           | .8718    |



|                             |         |     |                |                   |               |
|-----------------------------|---------|-----|----------------|-------------------|---------------|
| LeftnonWMhypointensities    | ASD     | 292 | .00            | .000 <sup>a</sup> | .000          |
|                             | non-ASD | 346 | .00            | .000 <sup>a</sup> | .000          |
| RightnonWMhypointensities   | ASD     | 292 | .00            | .000 <sup>a</sup> | .000          |
|                             | non-ASD | 346 | .00            | .000 <sup>a</sup> | .000          |
| OpticChiasm                 | ASD     | 292 | 220.420        | 60.8256           | 3.5596        |
|                             | non-ASD | 346 | 216.522        | 63.3614           | 3.4063        |
| CC_Posterior                | ASD     | 292 | 768.345        | 135.2535          | 7.9151        |
|                             | non-ASD | 346 | 796.419        | 131.3749          | 7.0628        |
| CC_Mid_Posterior            | ASD     | 292 | 383.405        | 81.7226           | 4.7825        |
|                             | non-ASD | 346 | 383.908        | 78.0690           | 4.1970        |
| CC_Central                  | ASD     | 292 | 416.242        | 94.5044           | 5.5305        |
|                             | non-ASD | 346 | 419.222        | 90.8271           | 4.8829        |
| CC_Mid_Anterior             | ASD     | 292 | 475.848        | 154.2578          | 9.0273        |
|                             | non-ASD | 346 | 448.688        | 123.8721          | 6.6594        |
| CC_Anterior                 | ASD     | 292 | 802.415        | 173.7126          | 10.1658       |
|                             | non-ASD | 346 | 795.260        | 151.6082          | 8.1505        |
| BrainSegVol                 | ASD     | 292 | 1149247.65     | 154436.056        | 9037.687      |
|                             | non-ASD | 346 | 1169059.24     | 125039.681        | 6722.175      |
| BrainSegVolNotVent          | ASD     | 292 | 1132218.17     | 153704.906        | 8994.899      |
|                             | non-ASD | 346 | 1153444.29     | 123637.169        | 6646.775      |
| BrainSegVolNotVentSurf      | ASD     | 292 | 1131928.557447 | 153898.7624408    | 9006.2438541  |
|                             | non-ASD | 346 | 1153371.316707 | 123789.0275334    | 6654.9393490  |
| lhCortexVol                 | ASD     | 292 | 270787.056397  | 45808.9069458     | 2680.7635104  |
|                             | non-ASD | 346 | 277564.607348  | 34813.4845168     | 1871.5845225  |
| rhCortexVol                 | ASD     | 292 | 271253.772318  | 47006.2170855     | 2750.8307865  |
|                             | non-ASD | 346 | 277406.573129  | 35198.0668041     | 1892.2597944  |
| CortexVol                   | ASD     | 292 | 542040.828721  | 92417.0476953     | 5408.2986414  |
|                             | non-ASD | 346 | 554971.180476  | 69729.1868785     | 3748.6643104  |
| lhCorticalWhiteMatterVol    | ASD     | 292 | 196558.589557  | 28098.6545192     | 1644.3493798  |
|                             | non-ASD | 346 | 200224.213798  | 25214.5530534     | 1355.5427700  |
| rhCorticalWhiteMatterVol    | ASD     | 292 | 198537.7453683 | 29510.08221541    | 1726.94693817 |
|                             | non-ASD | 346 | 201898.7143301 | 25630.59240854    | 1377.90918433 |
| CorticalWhiteMatterVol      | ASD     | 292 | 395096.334929  | 57344.9321073     | 3355.8583199  |
|                             | non-ASD | 346 | 402122.928126  | 50735.3165490     | 2727.5475154  |
| SubCortGrayVol              | ASD     | 292 | 61881.68       | 5844.316          | 342.013       |
|                             | non-ASD | 346 | 61899.67       | 5394.655          | 290.018       |
| TotalGrayVol                | ASD     | 292 | 710266.838995  | 102368.9415190    | 5990.6891763  |
|                             | non-ASD | 346 | 724269.622673  | 79162.7883677     | 4255.8178684  |
| SupraTentorialVol           | ASD     | 292 | 1014630.167037 | 146776.3826211    | 8589.4381016  |
|                             | non-ASD | 346 | 1033149.287790 | 117875.2482049    | 6337.0126027  |
| SupraTentorialVolNotVent    | ASD     | 292 | 1001020.317726 | 146063.8855704    | 8547.7423655  |
|                             | non-ASD | 346 | 1020787.992992 | 116557.1080995    | 6266.1489516  |
| SupraTentorialVolNotVentVox | ASD     | 292 | 999208.04      | 145898.649        | 8538.073      |
|                             | non-ASD | 346 | 1018989.55     | 116333.401        | 6254.122      |
| MaskVol                     | ASD     | 292 | 1589850.06     | 140495.662        | 8221.887      |
|                             | non-ASD | 346 | 1577429.40     | 130035.782        | 6990.767      |
| BrainSegVoltoeTIV           | ASD     | 292 | .78945679      | .077868694        | .004556921    |
|                             | non-ASD | 346 | .80889526      | .066745547        | .003588263    |
| MaskVoltoeTIV               | ASD     | 292 | 1.09356617     | .051926286        | .003038756    |
|                             | non-ASD | 346 | 1.09263153     | .072094237        | .003875810    |



|                               |         |     |                |                |              |
|-------------------------------|---------|-----|----------------|----------------|--------------|
| lhSurfaceHoles                | ASD     | 292 | 98.65          | 83.763         | 4.902        |
|                               | non-ASD | 346 | 67.09          | 49.832         | 2.679        |
| rhSurfaceHoles                | ASD     | 292 | 97.54          | 80.924         | 4.736        |
|                               | non-ASD | 346 | 66.40          | 47.377         | 2.547        |
| SurfaceHoles                  | ASD     | 292 | 196.19         | 163.068        | 9.543        |
|                               | non-ASD | 346 | 133.50         | 95.833         | 5.152        |
| EstimatedTotalIntraCranialVol | ASD     | 292 | 1457093.974568 | 146076.4263994 | 8548.4762621 |
|                               | non-ASD | 346 | 1449455.195723 | 149346.5283685 | 8028.9191060 |

a. t cannot be computed because the standard deviations of both groups are 0.

**Supplementary Table S7.** Independent ABIDE samples t- test results.

|                                 |                             | Independent Samples t Test              |      |        |         |             |             | t-test for Equality of Means |           |                 |                       | 95% Confidence Interval of the Difference |           |
|---------------------------------|-----------------------------|-----------------------------------------|------|--------|---------|-------------|-------------|------------------------------|-----------|-----------------|-----------------------|-------------------------------------------|-----------|
|                                 |                             | Levene's Test for Equality of Variances |      |        |         |             |             | Significance                 |           | Mean Difference | Std. Error Difference |                                           |           |
|                                 |                             | F                                       | Sig. | t      | df      | One-Sided p | Two-Sided p |                              |           |                 |                       | Lower                                     | Upper     |
| rh_bankssts_area                | Equal variances assumed     | 8.010                                   | .005 | -1.715 | 636     | .043        | .087        | -27.247722                   | 15.891172 | -58.453233      |                       | -                                         | 3.957788  |
|                                 | Equal variances not assumed |                                         |      | -1.687 | 563.411 | .046        | .092        | -27.247722                   | 16.152715 | -58.974618      |                       | -                                         | 4.479173  |
| rh_caudalanteriorcingulate_area | Equal variances assumed     | 7.050                                   | .008 | -2.152 | 636     | .016        | .032        | -29.312417                   | 13.618855 | -56.055775      |                       | -                                         | -2.569058 |
|                                 | Equal variances not assumed |                                         |      | -2.125 | 576.825 | .017        | .034        | -29.312417                   | 13.796211 | -56.409349      |                       | -                                         | -2.215484 |
| rh_caudalmiddlefrontal_area     | Equal variances assumed     | 6.198                                   | .013 | -1.771 | 636     | .039        | .077        | -64.08046                    | 36.17946  | -135.12610      |                       | -                                         | 6.96517   |
|                                 | Equal variances not assumed |                                         |      | -1.747 | 573.818 | .041        | .081        | -64.08046                    | 36.67911  | -136.12216      |                       | -                                         | 7.96123   |
| rh_cuneus_area                  | Equal variances assumed     | 2.029                                   | .155 | -.637  | 636     | .262        | .524        | -14.199940                   | 22.296806 | -57.984199      |                       | -                                         | 29.584319 |
|                                 | Equal variances not assumed |                                         |      | -.632  | 593.809 | .264        | .528        | -14.199940                   | 22.481943 | -58.353734      |                       | -                                         | 29.953854 |
| rh_entorhinal_area              | Equal variances assumed     | .004                                    | .951 | -.970  | 636     | .166        | .333        | -9.885514                    | 10.194537 | -29.904535      |                       | -                                         | 10.133507 |
|                                 | Equal variances not assumed |                                         |      | -.976  | 630.593 | .165        | .329        | -9.885514                    | 10.127928 | -29.774062      |                       | -                                         | 10.003034 |
| rh_fusiform_area                | Equal variances assumed     | 10.564                                  | .001 | -2.703 | 636     | .004        | .007        | -126.930816                  | 46.955669 | -219.13707      |                       | -                                         | 34.723924 |
|                                 | Equal variances not assumed |                                         |      | -2.669 | 577.416 | .004        | .008        | -126.930816                  | 47.559825 | -220.342159     |                       | -                                         | 33.519472 |
| rh_inferiorparietal_area        | Equal variances assumed     | 7.455                                   | .007 | -1.117 | 636     | .132        | .264        | -86.869129                   | 77.736023 | -239.519431     |                       | -                                         | 65.781173 |
|                                 | Equal variances not assumed |                                         |      | -1.104 | 581.033 | .135        | .270        | -86.869129                   | 78.661062 | -241.363797     |                       | -                                         | 67.625540 |
| rh_inferiortemporal_area        | Equal variances assumed     | 8.015                                   | .005 | -2.661 | 636     | .004        | .008        | -136.144198                  | 51.161032 | -236.609166     |                       | -                                         | 35.679230 |

|                              |                             |        |       |        |         |       |       |             |           |             |            |
|------------------------------|-----------------------------|--------|-------|--------|---------|-------|-------|-------------|-----------|-------------|------------|
|                              | Equal variances not assumed |        |       | -2.625 | 574.688 | .004  | .009  | -136.144198 | 51.855990 | -237.994572 | -34.293824 |
| rh_isthmuscingulate_area     | Equal variances assumed     | .927   | .336  | .110   | 636     | .456  | .912  | 1.670053    | 15.170531 | -28.120333  | 31.460438  |
|                              | Equal variances not assumed |        |       | .109   | 600.490 | .456  | .913  | 1.670053    | 15.265656 | -28.310511  | 31.650616  |
| rh_lateraloccipital_area     | Equal variances assumed     | 5.551  | .019  | -.708  | 636     | .239  | .479  | -43.192887  | 60.964647 | 162.909223  | 76.523450  |
|                              | Equal variances not assumed |        |       | -.699  | 572.539 | .243  | .485  | -43.192887  | 61.826815 | 164.627925  | 78.242151  |
| rh_lateralorbitofrontal_area | Equal variances assumed     | 6.684  | .010  | -3.992 | 636     | <.001 | <.001 | -150.875456 | 37.795863 | 225.09528   | 76.655685  |
|                              | Equal variances not assumed |        |       | -3.936 | 572.851 | <.001 | <.001 | -150.875456 | 38.327325 | 226.154682  | 75.596231  |
| rh_lingual_area              | Equal variances assumed     | 3.227  | .073  | -3.020 | 636     | .001  | .003  | -137.989383 | 45.686267 | 227.703550  | 48.275216  |
|                              | Equal variances not assumed |        |       | -2.985 | 581.800 | .001  | .003  | 137.989383  | 46.220450 | 228.768648  | 47.210118  |
| rh_medialorbitofrontal_area  | Equal variances assumed     | 9.518  | .002  | -3.351 | 636     | <.001 | <.001 | -87.898278  | 26.229502 | 139.405176  | 36.391380  |
|                              | Equal variances not assumed |        |       | -3.294 | 560.157 | <.001 | .001  | -87.898278  | 26.682363 | 140.307989  | 35.488567  |
| rh_middletemporal_area       | Equal variances assumed     | 4.168  | .042  | -2.484 | 636     | .007  | .013  | -119.493720 | 48.096040 | 213.939960  | 25.047480  |
|                              | Equal variances not assumed |        |       | -2.465 | 595.174 | .007  | .014  | 119.493720  | 48.475900 | 214.698343  | 24.289098  |
| rh_parahippocampal_area      | Equal variances assumed     | 1.523  | .218  | -1.036 | 636     | .150  | .300  | -12.892     | 12.441    | -37.322     | 11.538     |
|                              | Equal variances not assumed |        |       | -1.056 | 633.748 | .146  | .291  | -12.892     | 12.204    | -36.858     | 11.074     |
| rh_paracentral_area          | Equal variances assumed     | 11.499 | <.001 | .863   | 636     | .194  | .388  | 18.086246   | 20.957045 | 23.067122   | 59.239615  |
|                              | Equal variances not assumed |        |       | .846   | 547.528 | .199  | .398  | 18.086246   | 21.383003 | 23.916517   | 60.089009  |
| rh_parsopercularis_area      | Equal variances assumed     | 8.303  | .004  | -1.508 | 636     | .066  | .132  | -34.636222  | 22.965068 | 79.732748   | 10.460305  |
|                              | Equal variances not assumed |        |       | -1.488 | 574.017 | .069  | .137  | -34.636222  | 23.281036 | 80.362629   | 11.090186  |
| rh_parsorbitalis_area        | Equal variances assumed     | 2.678  | .102  | -2.180 | 636     | .015  | .030  | -24.510986  | 11.241487 | 46.585904   | -2.436067  |
|                              | Equal variances not assumed |        |       | -2.167 | 600.519 | .015  | .031  | 24.510986   | 11.311875 | 46.726629   | -2.295342  |
| rh_parstriangularis_area     | Equal variances assumed     | 1.038  | .309  | -2.322 | 636     | .010  | .021  | -58.023008  | 24.986236 | 107.088504  | -8.957511  |
|                              | Equal variances not assumed |        |       | -2.310 | 603.631 | .011  | .021  | 58.023008   | 25.117802 | 107.351903  | -8.694112  |
| rh_pericalcarine_area        | Equal variances assumed     | 5.768  | .017  | -3.513 | 636     | <.001 | <.001 | -86.904772  | 24.736565 | 135.479988  | 38.329556  |

|                                  |                             |        |      |        |         |       |       |             |           |             |            |
|----------------------------------|-----------------------------|--------|------|--------|---------|-------|-------|-------------|-----------|-------------|------------|
|                                  | Equal variances not assumed |        |      | -3.479 | 588.004 | <.001 | <.001 | -86.904772  | 24.983365 | -135.972266 | -37.837279 |
| rh_postcentral_area              | Equal variances assumed     | 4.033  | .045 | -1.621 | 636     | .053  | .105  | -85.501853  | 52.732201 | -189.052125 | 18.048420  |
|                                  | Equal variances not assumed |        |      | -1.608 | 592.664 | .054  | .108  | -85.501853  | 53.187781 | -189.961313 | 18.957608  |
| rh_posteriorcingulate_area       | Equal variances assumed     | 6.272  | .013 | -.982  | 636     | .163  | .327  | -19.188436  | 19.544255 | -57.567509  | 19.190636  |
|                                  | Equal variances not assumed |        |      | -.968  | 572.592 | .167  | .333  | -19.188436  | 19.820384 | -58.117963  | 19.741090  |
| rh_precentral_area               | Equal variances assumed     | 10.378 | .001 | -.458  | 636     | .323  | .647  | -26.734162  | 58.342714 | -141.301805 | 87.833481  |
|                                  | Equal variances not assumed |        |      | -.450  | 559.167 | .326  | .653  | -26.734162  | 59.364237 | -143.338319 | 89.869994  |
| rh_precuneus_area                | Equal variances assumed     | 3.840  | .050 | -.174  | 636     | .431  | .862  | -9.569578   | 55.051730 | -117.674713 | 98.535557  |
|                                  | Equal variances not assumed |        |      | -.172  | 588.572 | .432  | .863  | -9.569578   | 55.592145 | -118.752701 | 99.613545  |
| rh_rostralanteriorcingulate_area | Equal variances assumed     | 4.653  | .031 | -3.182 | 636     | <.001 | .002  | -39.961131  | 12.557730 | -64.620757  | 15.301505  |
|                                  | Equal variances not assumed |        |      | -3.144 | 580.178 | <.001 | .002  | -39.961131  | 12.710055 | -64.924457  | 14.997804  |
| rh_rostralmiddlefrontal_area     | Equal variances assumed     | 7.115  | .008 | -2.039 | 636     | .021  | .042  | -181.260311 | 88.897421 | -355.828262 | -6.692360  |
|                                  | Equal variances not assumed |        |      | -2.009 | 569.423 | .023  | .045  | -181.260311 | 90.225754 | -358.476215 | -4.044406  |
| rh_superiorfrontal_area          | Equal variances assumed     | 9.717  | .002 | -1.748 | 636     | .040  | .081  | -154.847377 | 88.571236 | -328.774799 | 19.080045  |
|                                  | Equal variances not assumed |        |      | -1.717 | 556.189 | .043  | .087  | -154.847377 | 90.186617 | -331.995390 | 22.300636  |
| rh_superiorparietal_area         | Equal variances assumed     | 10.372 | .001 | -1.419 | 636     | .078  | .156  | -95.243258  | 67.103215 | -227.013905 | 36.527390  |
|                                  | Equal variances not assumed |        |      | -1.398 | 568.936 | .081  | .163  | -95.243258  | 68.114224 | -229.029291 | 38.542776  |
| rh_superiortemporal_area         | Equal variances assumed     | 4.740  | .030 | -1.351 | 636     | .089  | .177  | -64.117454  | 47.471857 | -157.337986 | 29.103078  |
|                                  | Equal variances not assumed |        |      | -1.337 | 587.876 | .091  | .182  | -64.117454  | 47.947207 | -158.286128 | 30.051220  |
| rh_supramarginal_area            | Equal variances assumed     | 2.180  | .140 | -.703  | 636     | .241  | .482  | -37.456216  | 53.294558 | -142.110791 | 67.198359  |
|                                  | Equal variances not assumed |        |      | -.699  | 603.778 | .242  | .485  | -37.456216  | 53.572644 | -142.667574 | 67.755142  |
| rh_frontalpole_area              | Equal variances assumed     | 9.525  | .002 | 1.392  | 636     | .082  | .165  | 5.693877    | 4.091361  | -2.340332   | 13.728086  |
|                                  | Equal variances not assumed |        |      | 1.373  | 575.500 | .085  | .170  | 5.693877    | 4.146067  | -2.449391   | 13.837145  |
| rh_temporalpole_area             | Equal variances assumed     | .000   | .983 | -1.325 | 636     | .093  | .186  | -10.374261  | 7.827049  | -25.744244  | 4.995722   |

|                                 |                             |        |       |        |         |       |       |            |           |            |           |
|---------------------------------|-----------------------------|--------|-------|--------|---------|-------|-------|------------|-----------|------------|-----------|
|                                 | Equal variances not assumed |        |       | -1.355 | 630.626 | .088  | .176  | -10.374261 | 7.657915  | -25.412361 | 4.663839  |
| rh_transversetemporal_area      | Equal variances assumed     | 2.851  | .092  | -.535  | 636     | .296  | .593  | -3.042005  | 5.684103  | -14.203884 | 8.119874  |
|                                 | Equal variances not assumed |        |       | -.531  | 592.210 | .298  | .596  | -3.042005  | 5.733963  | -14.303381 | 8.219371  |
| rh_insula_area                  | Equal variances assumed     | .055   | .814  | -1.196 | 636     | .116  | .232  | -33.991775 | 28.426613 | -89.813142 | 21.829592 |
|                                 | Equal variances not assumed |        |       | -1.203 | 629.772 | .115  | .229  | -33.991775 | 28.257129 | -89.481373 | 21.497823 |
| rh_WhiteSurfArea_area           | Equal variances assumed     | 16.406 | <.001 | -2.448 | 635     | .007  | .015  | -2242.7174 | 916.2932  | -4042.0486 | -443.3862 |
|                                 | Equal variances not assumed |        |       | -2.395 | 538.563 | .008  | .017  | -2242.7174 | 936.5541  | -4082.4642 | -402.9706 |
| lh_bankssts_area                | Equal variances assumed     | .665   | .415  | -1.974 | 636     | .024  | .049  | -34.078    | 17.264    | -67.979    | -.176     |
|                                 | Equal variances not assumed |        |       | -1.970 | 613.594 | .025  | .049  | -34.078    | 17.295    | -68.042    | -.114     |
| lh_caudalanteriorcingulate_area | Equal variances assumed     | 1.711  | .191  | -1.998 | 636     | .023  | .046  | -23.917    | 11.973    | -47.428    | -.406     |
|                                 | Equal variances not assumed |        |       | -1.976 | 584.499 | .024  | .049  | -23.917    | 12.104    | -47.689    | -.144     |
| lh_caudalmiddlefrontal_area     | Equal variances assumed     | 10.615 | .001  | -2.213 | 636     | .014  | .027  | -77.545    | 35.045    | -146.363   | -8.727    |
|                                 | Equal variances not assumed |        |       | -2.171 | 552.327 | .015  | .030  | -77.545    | 35.717    | -147.703   | -7.387    |
| lh_cuneus_area                  | Equal variances assumed     | 4.993  | .026  | -1.974 | 636     | .024  | .049  | -41.616    | 21.085    | -83.021    | -.212     |
|                                 | Equal variances not assumed |        |       | -1.952 | 584.709 | .026  | .051  | -41.616    | 21.315    | -83.479    | .246      |
| lh_entorhinal_area              | Equal variances assumed     | .012   | .913  | -3.144 | 636     | <.001 | .002  | -32.040    | 10.191    | -52.052    | -12.028   |
|                                 | Equal variances not assumed |        |       | -3.213 | 630.784 | <.001 | .001  | -32.040    | 9.972     | -51.622    | -12.458   |
| lh_fusiform_area                | Equal variances assumed     | 4.560  | .033  | -2.913 | 636     | .002  | .004  | -134.713   | 46.241    | -225.516   | -43.910   |
|                                 | Equal variances not assumed |        |       | -2.890 | 594.751 | .002  | .004  | -134.713   | 46.612    | -226.257   | -43.169   |
| lh_inferiorparietal_area        | Equal variances assumed     | 3.327  | .069  | -1.851 | 636     | .032  | .065  | -119.943   | 64.816    | -247.221   | 7.336     |
|                                 | Equal variances not assumed |        |       | -1.834 | 591.351 | .034  | .067  | -119.943   | 65.400    | -248.388   | 8.503     |
| lh_inferiortemporal_area        | Equal variances assumed     | 7.869  | .005  | -2.835 | 636     | .002  | .005  | -149.026   | 52.560    | -252.238   | -45.813   |
|                                 | Equal variances not assumed |        |       | -2.802 | 581.061 | .003  | .005  | -149.026   | 53.185    | -253.485   | -44.567   |
| lh_isthmuscingulate_area        | Equal variances assumed     | 5.055  | .025  | .727   | 636     | .234  | .467  | 12.819     | 17.627    | -21.795    | 47.432    |
|                                 | Equal variances not assumed |        |       | .718   | 576.208 | .237  | .473  | 12.819     | 17.859    | -22.258    | 47.896    |
| lh_lateraloccipital_area        | Equal variances assumed     | 4.497  | .034  | -.759  | 636     | .224  | .448  | -43.147    | 56.851    | -154.786   | 68.492    |
|                                 | Equal variances not assumed |        |       | -.750  | 583.293 | .227  | .453  | -43.147    | 57.493    | -156.066   | 69.772    |
| lh_lateralorbitofrontal_area    | Equal variances assumed     | 11.041 | <.001 | -4.842 | 636     | <.001 | <.001 | -183.952   | 37.989    | -258.551   | -109.354  |
|                                 | Equal variances not assumed |        |       | -4.755 | 555.616 | <.001 | <.001 | -183.952   | 38.687    | -259.943   | -107.962  |
| lh_lingual_area                 | Equal variances assumed     | 2.585  | .108  | -3.551 | 636     | <.001 | <.001 | -169.936   | 47.854    | -263.907   | -75.965   |
|                                 | Equal variances not assumed |        |       | -3.514 | 585.723 | <.001 | <.001 | -169.936   | 48.362    | -264.920   | -74.952   |

|                                  |                             |        |       |        |         |       |       |          |        |          |         |
|----------------------------------|-----------------------------|--------|-------|--------|---------|-------|-------|----------|--------|----------|---------|
| lh_medialorbitofrontal_area      | Equal variances assumed     | 1.208  | .272  | -4.263 | 636     | <.001 | <.001 | -96.979  | 22.751 | -141.655 | -52.302 |
|                                  | Equal variances not assumed |        |       | -4.218 | 585.561 | <.001 | <.001 | -96.979  | 22.994 | -142.138 | -51.819 |
| lh_middletemporal_area           | Equal variances assumed     | 4.026  | .045  | -3.564 | 636     | <.001 | <.001 | -156.607 | 43.938 | -242.889 | -70.325 |
|                                  | Equal variances not assumed |        |       | -3.537 | 596.294 | <.001 | <.001 | -156.607 | 44.271 | -243.552 | -69.661 |
| lh_parahippocampal_area          | Equal variances assumed     | .162   | .687  | -1.749 | 636     | .040  | .081  | -23.866  | 13.649 | -50.669  | 2.936   |
|                                  | Equal variances not assumed |        |       | -1.739 | 602.885 | .041  | .083  | -23.866  | 13.724 | -50.820  | 3.087   |
| lh_paracentral_area              | Equal variances assumed     | 19.176 | <.001 | 1.432  | 636     | .076  | .153  | 23.541   | 16.442 | -8.747   | 55.829  |
|                                  | Equal variances not assumed |        |       | 1.397  | 529.292 | .081  | .163  | 23.541   | 16.847 | -9.554   | 56.636  |
| lh_parsopercularis_area          | Equal variances assumed     | 1.052  | .306  | -2.167 | 636     | .015  | .031  | -55.497  | 25.613 | -105.794 | -5.200  |
|                                  | Equal variances not assumed |        |       | -2.156 | 604.112 | .016  | .032  | -55.497  | 25.744 | -106.056 | -4.938  |
| lh_parsorbitalis_area            | Equal variances assumed     | 9.313  | .002  | -1.980 | 636     | .024  | .048  | -17.766  | 8.971  | -35.383  | -.149   |
|                                  | Equal variances not assumed |        |       | -1.947 | 560.944 | .026  | .052  | -17.766  | 9.124  | -35.689  | .156    |
| lh_parstriangularis_area         | Equal variances assumed     | 2.991  | .084  | -1.944 | 636     | .026  | .052  | -37.617  | 19.354 | -75.623  | .388    |
|                                  | Equal variances not assumed |        |       | -1.923 | 584.573 | .028  | .055  | -37.617  | 19.566 | -76.045  | .810    |
| lh_pericalcarine_area            | Equal variances assumed     | .615   | .433  | -3.918 | 636     | <.001 | <.001 | -86.308  | 22.029 | -129.565 | -43.050 |
|                                  | Equal variances not assumed |        |       | -3.892 | 598.915 | <.001 | <.001 | -86.308  | 22.178 | -129.863 | -42.752 |
| lh_postcentral_area              | Equal variances assumed     | 6.138  | .013  | -.483  | 636     | .315  | .629  | -24.698  | 51.114 | -125.070 | 75.674  |
|                                  | Equal variances not assumed |        |       | -.476  | 569.270 | .317  | .634  | -24.698  | 51.880 | -126.597 | 77.201  |
| lh_posteriorcingulate_area       | Equal variances assumed     | 4.166  | .042  | .003   | 636     | .499  | .998  | .044     | 16.603 | -32.560  | 32.648  |
|                                  | Equal variances not assumed |        |       | .003   | 583.578 | .499  | .998  | .044     | 16.789 | -32.931  | 33.019  |
| lh_precentral_area               | Equal variances assumed     | 5.323  | .021  | -1.018 | 636     | .155  | .309  | -53.142  | 52.219 | -155.684 | 49.400  |
|                                  | Equal variances not assumed |        |       | -1.002 | 565.649 | .158  | .317  | -53.142  | 53.049 | -157.339 | 51.055  |
| lh_precuneus_area                | Equal variances assumed     | 11.218 | <.001 | -1.244 | 636     | .107  | .214  | -59.658  | 47.948 | -153.814 | 34.497  |
|                                  | Equal variances not assumed |        |       | -1.225 | 566.642 | .111  | .221  | -59.658  | 48.698 | -155.310 | 35.993  |
| lh_rostralanteriorcingulate_area | Equal variances assumed     | 12.037 | <.001 | -3.466 | 636     | <.001 | <.001 | -51.292  | 14.798 | -80.351  | -22.233 |
|                                  | Equal variances not assumed |        |       | -3.407 | 560.191 | <.001 | <.001 | -51.292  | 15.054 | -80.860  | -21.724 |
| lh_rostralmiddlefrontal_area     | Equal variances assumed     | 8.655  | .003  | -2.573 | 636     | .005  | .010  | -206.830 | 80.371 | -364.654 | -49.006 |
|                                  | Equal variances not assumed |        |       | -2.532 | 564.186 | .006  | .012  | -206.830 | 81.678 | -367.260 | -46.400 |
| lh_superiorfrontal_area          | Equal variances assumed     | 6.213  | .013  | -2.736 | 636     | .003  | .006  | -235.685 | 86.140 | -404.837 | -66.532 |
|                                  | Equal variances not assumed |        |       | -2.691 | 561.880 | .004  | .007  | -235.685 | 87.590 | -407.729 | -63.640 |
| lh_superiorparietal_area         | Equal variances assumed     | 14.525 | <.001 | -1.569 | 636     | .059  | .117  | -101.317 | 64.568 | -228.108 | 25.475  |
|                                  | Equal variances not assumed |        |       | -1.535 | 539.822 | .063  | .125  | -101.317 | 65.998 | -230.960 | 28.327  |
| lh_superiortemporal_area         | Equal variances assumed     | 4.843  | .028  | -.966  | 636     | .167  | .334  | -47.233  | 48.894 | -143.246 | 48.780  |
|                                  | Equal variances not assumed |        |       | -.954  | 579.439 | .170  | .340  | -47.233  | 49.497 | -144.448 | 49.982  |

|                                     |                             |        |       |        |         |       |       |            |          |            |           |
|-------------------------------------|-----------------------------|--------|-------|--------|---------|-------|-------|------------|----------|------------|-----------|
| lh_supramarginal_area               | Equal variances assumed     | .698   | .404  | -.844  | 636     | .199  | .399  | -46.740    | 55.363   | -155.456   | 61.976    |
|                                     | Equal variances not assumed |        |       | -.843  | 612.888 | .200  | .400  | -46.740    | 55.476   | -155.687   | 62.207    |
| lh_frontalpole_area                 | Equal variances assumed     | .066   | .797  | .334   | 636     | .369  | .739  | 1.145      | 3.433    | -5.597     | 7.887     |
|                                     | Equal variances not assumed |        |       | .331   | 595.250 | .370  | .741  | 1.145      | 3.460    | -5.651     | 7.941     |
| lh_temporalpole_area                | Equal variances assumed     | .662   | .416  | -1.715 | 636     | .043  | .087  | -11.446    | 6.673    | -24.549    | 1.658     |
|                                     | Equal variances not assumed |        |       | -1.705 | 600.826 | .044  | .089  | -11.446    | 6.714    | -24.632    | 1.741     |
| lh_transversetemporal_area          | Equal variances assumed     | 8.615  | .003  | 1.390  | 636     | .082  | .165  | 9.831      | 7.071    | -4.055     | 23.717    |
|                                     | Equal variances not assumed |        |       | 1.364  | 553.358 | .087  | .173  | 9.831      | 7.205    | -4.322     | 23.984    |
| lh_insula_area                      | Equal variances assumed     | 3.902  | .049  | -.689  | 636     | .246  | .491  | -17.467    | 25.358   | -67.263    | 32.329    |
|                                     | Equal variances not assumed |        |       | -.684  | 599.242 | .247  | .494  | -17.467    | 25.527   | -67.600    | 32.666    |
| lh_WhiteSurfArea_area               | Equal variances assumed     | 12.075 | <.001 | -2.570 | 636     | .005  | .010  | -2292.6070 | 891.9239 | -4044.0787 | -541.1352 |
|                                     | Equal variances not assumed |        |       | -2.524 | 556.262 | .006  | .012  | -2292.6070 | 908.1750 | -4076.4785 | -508.7354 |
| lh_bankssts_meancurv                | Equal variances assumed     | 8.390  | .004  | 3.881  | 636     | <.001 | <.001 | .005819    | .001499  | .002875    | .008763   |
|                                     | Equal variances not assumed |        |       | 3.773  | 510.739 | <.001 | <.001 | .005819    | .001542  | .002789    | .008849   |
| lh_caudalanteriorcingulate_meancurv | Equal variances assumed     | 1.038  | .309  | -.167  | 636     | .434  | .867  | -.000265   | .001587  | -.003381   | .002851   |
|                                     | Equal variances not assumed |        |       | -.165  | 582.264 | .434  | .869  | -.000265   | .001605  | -.003417   | .002887   |
| lh_caudalmiddlefrontal_meancurv     | Equal variances assumed     | 13.093 | <.001 | 5.020  | 636     | <.001 | <.001 | .008081    | .001610  | .004920    | .011243   |
|                                     | Equal variances not assumed |        |       | 4.919  | 547.210 | <.001 | <.001 | .008081    | .001643  | .004854    | .011308   |
| lh_cuneus_meancurv                  | Equal variances assumed     | 8.461  | .004  | 4.787  | 636     | <.001 | <.001 | .008890    | .001857  | .005243    | .012538   |
|                                     | Equal variances not assumed |        |       | 4.591  | 450.469 | <.001 | <.001 | .008890    | .001937  | .005084    | .012696   |
| lh_entorhinal_meancurv              | Equal variances assumed     | 7.905  | .005  | 2.784  | 636     | .003  | .006  | .009926    | .003566  | .002924    | .016929   |
|                                     | Equal variances not assumed |        |       | 2.720  | 534.175 | .003  | .007  | .009926    | .003650  | .002757    | .017096   |
| lh_fusiform_meancurv                | Equal variances assumed     | 16.755 | <.001 | 6.619  | 636     | <.001 | <.001 | .010911    | .001649  | .007674    | .014148   |
|                                     | Equal variances not assumed |        |       | 6.408  | 492.968 | <.001 | <.001 | .010911    | .001703  | .007565    | .014257   |
| lh_inferiorparietal_meancurv        | Equal variances assumed     | 13.748 | <.001 | 5.882  | 636     | <.001 | <.001 | .009749    | .001657  | .006494    | .013003   |
|                                     | Equal variances not assumed |        |       | 5.635  | 445.814 | <.001 | <.001 | .009749    | .001730  | .006349    | .013149   |
| lh_inferiortemporal_meancurv        | Equal variances assumed     | 10.486 | .001  | 6.478  | 636     | <.001 | <.001 | .010101    | .001559  | .007039    | .013163   |
|                                     | Equal variances not assumed |        |       | 6.310  | 520.831 | <.001 | <.001 | .010101    | .001601  | .006956    | .013246   |
| lh_isthmuscingulate_meancurv        | Equal variances assumed     | 7.178  | .008  | 3.413  | 636     | <.001 | <.001 | .004280    | .001254  | .001818    | .006742   |
|                                     | Equal variances not assumed |        |       | 3.350  | 553.943 | <.001 | <.001 | .004280    | .001277  | .001771    | .006789   |
| lh_lateraloccipital_meancurv        | Equal variances assumed     | 23.507 | <.001 | 7.223  | 636     | <.001 | <.001 | .012069    | .001671  | .008788    | .015350   |
|                                     | Equal variances not assumed |        |       | 6.999  | 496.947 | <.001 | <.001 | .012069    | .001724  | .008681    | .015457   |
| lh_lateralorbitofrontal_meancurv    | Equal variances assumed     | 14.581 | <.001 | 4.019  | 636     | <.001 | <.001 | .005960    | .001483  | .003048    | .008872   |

|                                      |                             |        |       |       |         |       |       |         |         |          |         |
|--------------------------------------|-----------------------------|--------|-------|-------|---------|-------|-------|---------|---------|----------|---------|
|                                      | Equal variances not assumed |        |       | 3.875 | 475.184 | <.001 | <.001 | .005960 | .001538 | .002938  | .008981 |
| lh_lingual_meancurv                  | Equal variances assumed     | 18.784 | <.001 | 5.640 | 636     | <.001 | <.001 | .009863 | .001749 | .006429  | .013297 |
|                                      | Equal variances not assumed |        |       | 5.502 | 527.246 | <.001 | <.001 | .009863 | .001793 | .006341  | .013385 |
| lh_medialorbitofrontal_meancurv      | Equal variances assumed     | 3.785  | .052  | 3.913 | 636     | <.001 | <.001 | .006332 | .001618 | .003154  | .009509 |
|                                      | Equal variances not assumed |        |       | 3.785 | 488.929 | <.001 | <.001 | .006332 | .001673 | .003045  | .009619 |
| lh_middletemporal_meancurv           | Equal variances assumed     | 6.321  | .012  | 5.518 | 636     | <.001 | <.001 | .009182 | .001664 | .005914  | .012449 |
|                                      | Equal variances not assumed |        |       | 5.379 | 523.721 | <.001 | <.001 | .009182 | .001707 | .005828  | .012535 |
| lh parahippocampal_meancurv          | Equal variances assumed     | 4.736  | .030  | 3.396 | 636     | <.001 | <.001 | .008170 | .002406 | .003446  | .012894 |
|                                      | Equal variances not assumed |        |       | 3.350 | 573.777 | <.001 | <.001 | .008170 | .002439 | .003379  | .012960 |
| lh_paracentral_meancurv              | Equal variances assumed     | 11.329 | <.001 | 5.059 | 636     | <.001 | <.001 | .009143 | .001807 | .005594  | .012693 |
|                                      | Equal variances not assumed |        |       | 4.936 | 528.098 | <.001 | <.001 | .009143 | .001852 | .005504  | .012782 |
| lh_parsopercularis_meancurv          | Equal variances assumed     | 14.886 | <.001 | 5.621 | 636     | <.001 | <.001 | .008647 | .001538 | .005626  | .011667 |
|                                      | Equal variances not assumed |        |       | 5.444 | 494.129 | <.001 | <.001 | .008647 | .001588 | .005526  | .011768 |
| lh_parsorbitalis_meancurv            | Equal variances assumed     | 9.717  | .002  | 4.406 | 636     | <.001 | <.001 | .009324 | .002116 | .005169  | .013479 |
|                                      | Equal variances not assumed |        |       | 4.337 | 565.391 | <.001 | <.001 | .009324 | .002150 | .005101  | .013547 |
| lh_parstriangularis_meancurv         | Equal variances assumed     | 13.811 | <.001 | 4.358 | 636     | <.001 | <.001 | .007703 | .001767 | .004232  | .011173 |
|                                      | Equal variances not assumed |        |       | 4.209 | 481.887 | <.001 | <.001 | .007703 | .001830 | .004107  | .011298 |
| lh_pericalcarine_meancurv            | Equal variances assumed     | 14.809 | <.001 | 4.923 | 636     | <.001 | <.001 | .010756 | .002185 | .006466  | .015047 |
|                                      | Equal variances not assumed |        |       | 4.719 | 448.463 | <.001 | <.001 | .010756 | .002279 | .006277  | .015236 |
| lh_postcentral_meancurv              | Equal variances assumed     | 12.728 | <.001 | 5.676 | 636     | <.001 | <.001 | .011124 | .001960 | .007276  | .014973 |
|                                      | Equal variances not assumed |        |       | 5.538 | 528.200 | <.001 | <.001 | .011124 | .002009 | .007179  | .015070 |
| lh_posteriorcingulate_meancurv       | Equal variances assumed     | 1.148  | .284  | 2.008 | 636     | .023  | .045  | .002553 | .001271 | .000057  | .005050 |
|                                      | Equal variances not assumed |        |       | 1.998 | 603.691 | .023  | .046  | .002553 | .001278 | .000043  | .005063 |
| lh_precentral_meancurv               | Equal variances assumed     | 11.123 | <.001 | 5.459 | 636     | <.001 | <.001 | .009568 | .001753 | .006127  | .013010 |
|                                      | Equal variances not assumed |        |       | 5.342 | 540.706 | <.001 | <.001 | .009568 | .001791 | .006050  | .013087 |
| lh_precuneus_meancurv                | Equal variances assumed     | 12.993 | <.001 | 4.311 | 636     | <.001 | <.001 | .005288 | .001226 | .002879  | .007696 |
|                                      | Equal variances not assumed |        |       | 4.184 | 503.705 | <.001 | <.001 | .005288 | .001264 | .002805  | .007771 |
| lh_rostralanteriorcingulate_meancurv | Equal variances assumed     | 6.921  | .009  | .298  | 636     | .383  | .766  | .000479 | .001607 | -.002676 | .003634 |
|                                      | Equal variances not assumed |        |       | .291  | 527.977 | .386  | .771  | .000479 | .001647 | -.002756 | .003714 |
| lh_rostralmiddlefrontal_meancurv     | Equal variances assumed     | 11.853 | <.001 | 5.193 | 636     | <.001 | <.001 | .007197 | .001386 | .004475  | .009918 |
|                                      | Equal variances not assumed |        |       | 5.061 | 522.460 | <.001 | <.001 | .007197 | .001422 | .004403  | .009990 |
| lh_superiorfrontal_meancurv          | Equal variances assumed     | 13.840 | <.001 | 5.336 | 636     | <.001 | <.001 | .007616 | .001427 | .004813  | .010418 |
|                                      | Equal variances not assumed |        |       | 5.207 | 529.180 | <.001 | <.001 | .007616 | .001462 | .004743  | .010489 |
| lh_superiorparietal_meancurv         | Equal variances assumed     | 18.709 | <.001 | 5.104 | 636     | <.001 | <.001 | .008869 | .001738 | .005457  | .012281 |



|                                     |                             |        |       |       |         |       |       |         |         |          |         |
|-------------------------------------|-----------------------------|--------|-------|-------|---------|-------|-------|---------|---------|----------|---------|
|                                     | Equal variances not assumed |        |       | 4.926 | 478.854 | <.001 | <.001 | .008869 | .001800 | .005331  | .012407 |
| lh_superiortemporal_meancurv        | Equal variances assumed     | 12.788 | <.001 | 5.599 | 636     | <.001 | <.001 | .010641 | .001900 | .006909  | .014373 |
|                                     | Equal variances not assumed |        |       | 5.450 | 517.371 | <.001 | <.001 | .010641 | .001952 | .006805  | .014476 |
| lh_supramarginal_meancurv           | Equal variances assumed     | 21.534 | <.001 | 5.142 | 636     | <.001 | <.001 | .007454 | .001450 | .004608  | .010301 |
|                                     | Equal variances not assumed |        |       | 4.982 | 496.038 | <.001 | <.001 | .007454 | .001496 | .004514  | .010394 |
| lh_frontalpole_meancurv             | Equal variances assumed     | .812   | .368  | 3.163 | 636     | <.001 | .002  | .008445 | .002670 | .003202  | .013689 |
|                                     | Equal variances not assumed |        |       | 3.142 | 599.108 | <.001 | .002  | .008445 | .002688 | .003166  | .013725 |
| lh_temporalpole_meancurv            | Equal variances assumed     | 4.523  | .034  | 3.439 | 636     | <.001 | <.001 | .012159 | .003536 | .005215  | .019102 |
|                                     | Equal variances not assumed |        |       | 3.367 | 543.710 | <.001 | <.001 | .012159 | .003611 | .005066  | .019252 |
| lh_transversetemporal_meancurv      | Equal variances assumed     | 7.513  | .006  | 4.167 | 636     | <.001 | <.001 | .007795 | .001871 | .004122  | .011468 |
|                                     | Equal variances not assumed |        |       | 4.101 | 564.543 | <.001 | <.001 | .007795 | .001901 | .004062  | .011529 |
| lh_insula_meancurv                  | Equal variances assumed     | 7.801  | .005  | 2.670 | 636     | .004  | .008  | .003999 | .001498 | .001057  | .006940 |
|                                     | Equal variances not assumed |        |       | 2.603 | 525.683 | .005  | .009  | .003999 | .001536 | .000981  | .007016 |
| rh_bankssts_meancurv                | Equal variances assumed     | 9.847  | .002  | 2.688 | 636     | .004  | .007  | .004262 | .001585 | .001149  | .007375 |
|                                     | Equal variances not assumed |        |       | 2.580 | 453.599 | .005  | .010  | .004262 | .001652 | .001016  | .007508 |
| rh_caudalanteriorcingulate_meancurv | Equal variances assumed     | 3.218  | .073  | .399  | 636     | .345  | .690  | .000565 | .001417 | -.002217 | .003348 |
|                                     | Equal variances not assumed |        |       | .389  | 524.627 | .349  | .697  | .000565 | .001453 | -.002290 | .003420 |
| rh_caudalmiddlefrontal_meancurv     | Equal variances assumed     | 18.416 | <.001 | 5.334 | 636     | <.001 | <.001 | .009469 | .001775 | .005983  | .012955 |
|                                     | Equal variances not assumed |        |       | 5.173 | 501.120 | <.001 | <.001 | .009469 | .001830 | .005872  | .013065 |
| rh_cuneus_meancurv                  | Equal variances assumed     | 6.499  | .011  | 3.892 | 636     | <.001 | <.001 | .008855 | .002275 | .004387  | .013323 |
|                                     | Equal variances not assumed |        |       | 3.727 | 443.350 | <.001 | <.001 | .008855 | .002376 | .004185  | .013525 |
| rh_entorhinal_meancurv              | Equal variances assumed     | 16.560 | <.001 | 3.569 | 636     | <.001 | <.001 | .012998 | .003642 | .005846  | .020150 |
|                                     | Equal variances not assumed |        |       | 3.474 | 517.555 | <.001 | <.001 | .012998 | .003741 | .005648  | .020349 |
| rh_fusiform_meancurv                | Equal variances assumed     | 8.968  | .003  | 4.859 | 636     | <.001 | <.001 | .007907 | .001627 | .004712  | .011102 |
|                                     | Equal variances not assumed |        |       | 4.707 | 495.716 | <.001 | <.001 | .007907 | .001680 | .004607  | .011207 |
| rh_inferiorparietal_meancurv        | Equal variances assumed     | 14.133 | <.001 | 5.149 | 636     | <.001 | <.001 | .008055 | .001564 | .004983  | .011127 |
|                                     | Equal variances not assumed |        |       | 4.941 | 452.786 | <.001 | <.001 | .008055 | .001630 | .004851  | .011259 |
| rh_inferiortemporal_meancurv        | Equal variances assumed     | 12.716 | <.001 | 4.922 | 636     | <.001 | <.001 | .007625 | .001549 | .004583  | .010667 |
|                                     | Equal variances not assumed |        |       | 4.809 | 534.397 | <.001 | <.001 | .007625 | .001585 | .004510  | .010739 |
| rh_isthmuscingulate_meancurv        | Equal variances assumed     | 5.483  | .020  | 2.419 | 636     | .008  | .016  | .003627 | .001499 | .000683  | .006571 |
|                                     | Equal variances not assumed |        |       | 2.321 | 451.927 | .010  | .021  | .003627 | .001563 | .000556  | .006698 |
| rh_lateraloccipital_meancurv        | Equal variances assumed     | 13.715 | <.001 | 6.434 | 636     | <.001 | <.001 | .009626 | .001496 | .006688  | .012564 |
|                                     | Equal variances not assumed |        |       | 6.253 | 510.601 | <.001 | <.001 | .009626 | .001539 | .006602  | .012650 |
| rh_lateralorbitofrontal_meancurv    | Equal variances assumed     | 8.835  | .003  | 4.079 | 636     | <.001 | <.001 | .006060 | .001485 | .003143  | .008977 |



|                                      |                             |        |       |       |         |       |       |          |         |          |         |
|--------------------------------------|-----------------------------|--------|-------|-------|---------|-------|-------|----------|---------|----------|---------|
|                                      | Equal variances not assumed |        |       | 3.950 | 493.823 | <.001 | <.001 | .006060  | .001534 | .003046  | .009074 |
| rh_lingual_meancurv                  | Equal variances assumed     | 13.558 | <.001 | 5.023 | 636     | <.001 | <.001 | .008192  | .001631 | .004989  | .011394 |
|                                      | Equal variances not assumed |        |       | 4.929 | 552.118 | <.001 | <.001 | .008192  | .001662 | .004927  | .011456 |
| rh_medialorbitofrontal_meancurv      | Equal variances assumed     | 3.846  | .050  | 3.111 | 636     | <.001 | .002  | .004259  | .001369 | .001571  | .006947 |
|                                      | Equal variances not assumed |        |       | 3.055 | 556.237 | .001  | .002  | .004259  | .001394 | .001521  | .006997 |
| rh_middletemporal_meancurv           | Equal variances assumed     | 10.701 | .001  | 4.505 | 636     | <.001 | <.001 | .007211  | .001601 | .004068  | .010355 |
|                                      | Equal variances not assumed |        |       | 4.406 | 538.748 | <.001 | <.001 | .007211  | .001637 | .003996  | .010426 |
| rh parahippocampal_meancurv          | Equal variances assumed     | 2.187  | .140  | 2.764 | 636     | .003  | .006  | .006384  | .002309 | .001849  | .010919 |
|                                      | Equal variances not assumed |        |       | 2.728 | 576.114 | .003  | .007  | .006384  | .002340 | .001788  | .010980 |
| rh_paracentral_meancurv              | Equal variances assumed     | 9.296  | .002  | 4.137 | 636     | <.001 | <.001 | .007233  | .001748 | .003800  | .010666 |
|                                      | Equal variances not assumed |        |       | 4.008 | 495.485 | <.001 | <.001 | .007233  | .001805 | .003687  | .010779 |
| rh_parsopercularis_meancurv          | Equal variances assumed     | 6.732  | .010  | 4.848 | 636     | <.001 | <.001 | .006940  | .001432 | .004128  | .009751 |
|                                      | Equal variances not assumed |        |       | 4.744 | 540.943 | <.001 | <.001 | .006940  | .001463 | .004066  | .009813 |
| rh_parsorbitalis_meancurv            | Equal variances assumed     | 7.611  | .006  | 5.463 | 636     | <.001 | <.001 | .011090  | .002030 | .007104  | .015076 |
|                                      | Equal variances not assumed |        |       | 5.355 | 547.628 | <.001 | <.001 | .011090  | .002071 | .007022  | .015159 |
| rh_parstriangularis_meancurv         | Equal variances assumed     | 21.107 | <.001 | 5.978 | 636     | <.001 | <.001 | .010676  | .001786 | .007170  | .014183 |
|                                      | Equal variances not assumed |        |       | 5.739 | 455.003 | <.001 | <.001 | .010676  | .001860 | .007021  | .014332 |
| rh_pericalcarine_meancurv            | Equal variances assumed     | 18.749 | <.001 | 5.724 | 636     | <.001 | <.001 | .013513  | .002361 | .008878  | .018149 |
|                                      | Equal variances not assumed |        |       | 5.501 | 459.477 | <.001 | <.001 | .013513  | .002457 | .008686  | .018341 |
| rh_postcentral_meancurv              | Equal variances assumed     | 9.012  | .003  | 4.802 | 636     | <.001 | <.001 | .009924  | .002067 | .005866  | .013983 |
|                                      | Equal variances not assumed |        |       | 4.704 | 545.073 | <.001 | <.001 | .009924  | .002110 | .005780  | .014069 |
| rh_posteriorcingulate_meancurv       | Equal variances assumed     | 9.358  | .002  | 3.042 | 636     | .001  | .002  | .003775  | .001241 | .001338  | .006212 |
|                                      | Equal variances not assumed |        |       | 2.931 | 472.328 | .002  | .004  | .003775  | .001288 | .001244  | .006305 |
| rh_precentral_meancurv               | Equal variances assumed     | 9.288  | .002  | 5.093 | 636     | <.001 | <.001 | .009032  | .001773 | .005550  | .012514 |
|                                      | Equal variances not assumed |        |       | 4.980 | 537.351 | <.001 | <.001 | .009032  | .001814 | .005469  | .012595 |
| rh_precuneus_meancurv                | Equal variances assumed     | 14.183 | <.001 | 3.935 | 636     | <.001 | <.001 | .005066  | .001287 | .002538  | .007595 |
|                                      | Equal variances not assumed |        |       | 3.791 | 470.135 | <.001 | <.001 | .005066  | .001337 | .002440  | .007693 |
| rh_rostralanteriorcingulate_meancurv | Equal variances assumed     | 4.806  | .029  | -.183 | 636     | .428  | .855  | -.000358 | .001960 | -.004207 | .003492 |
|                                      | Equal variances not assumed |        |       | -.176 | 478.336 | .430  | .860  | -.000358 | .002031 | -.004349 | .003634 |
| rh_rostralmiddlefrontal_meancurv     | Equal variances assumed     | 9.928  | .002  | 4.934 | 636     | <.001 | <.001 | .006975  | .001414 | .004199  | .009751 |
|                                      | Equal variances not assumed |        |       | 4.818 | 531.095 | <.001 | <.001 | .006975  | .001448 | .004131  | .009820 |
| rh_superiorfrontal_meancurv          | Equal variances assumed     | 14.835 | <.001 | 5.673 | 636     | <.001 | <.001 | .007892  | .001391 | .005160  | .010624 |
|                                      | Equal variances not assumed |        |       | 5.535 | 527.781 | <.001 | <.001 | .007892  | .001426 | .005091  | .010694 |
| rh_superiorparietal_meancurv         | Equal variances assumed     | 15.271 | <.001 | 4.852 | 636     | <.001 | <.001 | .008623  | .001777 | .005133  | .012113 |

|                                      |                             |        |       |        |         |       |       |          |         |          |          |
|--------------------------------------|-----------------------------|--------|-------|--------|---------|-------|-------|----------|---------|----------|----------|
|                                      | Equal variances not assumed |        |       | 4.716  | 511.432 | <.001 | <.001 | .008623  | .001828 | .005031  | .012215  |
| rh_superiortemporal_mearcurv         | Equal variances assumed     | 5.904  | .015  | 4.833  | 636     | <.001 | <.001 | .009566  | .001979 | .005679  | .013452  |
|                                      | Equal variances not assumed |        |       | 4.705  | 517.408 | <.001 | <.001 | .009566  | .002033 | .005571  | .013560  |
| rh_supramarginal_mearcurv            | Equal variances assumed     | 14.504 | <.001 | 4.093  | 636     | <.001 | <.001 | .006752  | .001650 | .003513  | .009992  |
|                                      | Equal variances not assumed |        |       | 3.946  | 473.054 | <.001 | <.001 | .006752  | .001711 | .003390  | .010115  |
| rh_frontalpole_mearcurv              | Equal variances assumed     | 3.929  | .048  | 4.510  | 636     | <.001 | <.001 | .011051  | .002450 | .006240  | .015863  |
|                                      | Equal variances not assumed |        |       | 4.434  | 560.825 | <.001 | <.001 | .011051  | .002492 | .006156  | .015947  |
| rh_temporalpole_mearcurv             | Equal variances assumed     | 6.289  | .012  | 2.636  | 636     | .004  | .009  | .008689  | .003297 | .002215  | .015164  |
|                                      | Equal variances not assumed |        |       | 2.595  | 566.846 | .005  | .010  | .008689  | .003348 | .002113  | .015266  |
| rh_transversetemporal_mearcurv       | Equal variances assumed     | 6.657  | .010  | 4.185  | 636     | <.001 | <.001 | .008601  | .002055 | .004565  | .012636  |
|                                      | Equal variances not assumed |        |       | 4.104  | 549.373 | <.001 | <.001 | .008601  | .002096 | .004484  | .012717  |
| rh_insula_mearcurv                   | Equal variances assumed     | 5.640  | .018  | 2.313  | 636     | .011  | .021  | .003335  | .001442 | .000503  | .006166  |
|                                      | Equal variances not assumed |        |       | 2.266  | 545.031 | .012  | .024  | .003335  | .001472 | .000443  | .006226  |
| rh_bankssts_thickness                | Equal variances assumed     | 18.378 | <.001 | -1.918 | 636     | .028  | .055  | -.044566 | .023230 | -.090182 | .001051  |
|                                      | Equal variances not assumed |        |       | -1.867 | 515.499 | .031  | .063  | -.044566 | .023875 | -.091470 | .002338  |
| rh_caudalanteriorcingulate_thickness | Equal variances assumed     | 1.671  | .197  | -3.440 | 636     | <.001 | <.001 | -.097282 | .028279 | -.152813 | -.041750 |
|                                      | Equal variances not assumed |        |       | -3.400 | 581.451 | <.001 | <.001 | -.097282 | .028612 | -.153478 | -.041085 |
| rh_caudalmiddlefrontal_thickness     | Equal variances assumed     | 9.443  | .002  | -1.101 | 636     | .136  | .271  | -.021818 | .019815 | -.060729 | .017093  |
|                                      | Equal variances not assumed |        |       | -1.083 | 562.658 | .140  | .279  | -.021818 | .020145 | -.061386 | .017751  |
| rh_cuneus_thickness                  | Equal variances assumed     | .833   | .362  | 1.467  | 636     | .071  | .143  | .024659  | .016808 | -.008347 | .057664  |
|                                      | Equal variances not assumed |        |       | 1.461  | 607.570 | .072  | .144  | .024659  | .016874 | -.008480 | .057797  |
| rh_entorhinal_thickness              | Equal variances assumed     | 12.744 | <.001 | -2.265 | 636     | .012  | .024  | -.098251 | .043382 | -.183439 | -.013063 |
|                                      | Equal variances not assumed |        |       | -2.219 | 545.242 | .013  | .027  | -.098251 | .044287 | -.185245 | -.011257 |
| rh_fusiform_thickness                | Equal variances assumed     | 19.268 | <.001 | -3.455 | 636     | <.001 | <.001 | -.076892 | .022254 | -.120592 | -.033192 |
|                                      | Equal variances not assumed |        |       | -3.388 | 549.522 | <.001 | <.001 | -.076892 | .022696 | -.121473 | -.032311 |
| rh_inferiorparietal_thickness        | Equal variances assumed     | 10.751 | .001  | -1.293 | 636     | .098  | .196  | -.021864 | .016903 | -.055057 | .011329  |
|                                      | Equal variances not assumed |        |       | -1.271 | 559.927 | .102  | .204  | -.021864 | .017196 | -.055640 | .011913  |
| rh_inferiortemporal_thickness        | Equal variances assumed     | 18.048 | <.001 | -2.462 | 636     | .007  | .014  | -.061087 | .024811 | -.109809 | -.012365 |
|                                      | Equal variances not assumed |        |       | -2.420 | 560.145 | .008  | .016  | -.061087 | .025240 | -.110663 | -.011511 |
| rh_isthmuscingulate_thickness        | Equal variances assumed     | 6.121  | .014  | -2.970 | 636     | .002  | .003  | -.062765 | .021134 | -.104265 | -.021264 |
|                                      | Equal variances not assumed |        |       | -2.922 | 563.482 | .002  | .004  | -.062765 | .021481 | -.104958 | -.020571 |
| rh_lateraloccipital_thickness        | Equal variances assumed     | 4.043  | .045  | .803   | 636     | .211  | .422  | .010836  | .013488 | -.015651 | .037322  |
|                                      | Equal variances not assumed |        |       | .795   | 587.182 | .213  | .427  | .010836  | .013626 | -.015925 | .037597  |
| rh_lateralorbitofrontal_thickness    | Equal variances assumed     | 14.512 | <.001 | -.736  | 636     | .231  | .462  | -.016461 | .022366 | -.060380 | .027459  |

|                                       |                             |        |       |        |         |       |       |          |         |          |          |
|---------------------------------------|-----------------------------|--------|-------|--------|---------|-------|-------|----------|---------|----------|----------|
|                                       | Equal variances not assumed |        |       | -.720  | 541.181 | .236  | .472  | -.016461 | .022854 | -.061354 | .028433  |
| rh_lingual_thickness                  | Equal variances assumed     | 1.437  | .231  | .655   | 636     | .256  | .513  | .009917  | .015137 | -.019808 | .039642  |
|                                       | Equal variances not assumed |        |       | .650   | 596.508 | .258  | .516  | .009917  | .015251 | -.020035 | .039869  |
| rh_medialorbitofrontal_thickness      | Equal variances assumed     | 16.459 | <.001 | 1.550  | 636     | .061  | .122  | .029934  | .019309 | -.007983 | .067851  |
|                                       | Equal variances not assumed |        |       | 1.516  | 537.362 | .065  | .130  | .029934  | .019748 | -.008858 | .068727  |
| rh_middletemporal_thickness           | Equal variances assumed     | 7.029  | .008  | -2.933 | 636     | .002  | .003  | -.080594 | .027481 | -.134559 | -.026629 |
|                                       | Equal variances not assumed |        |       | -2.904 | 588.034 | .002  | .004  | -.080594 | .027755 | -.135105 | -.026083 |
| rh_parahippocampal_thickness          | Equal variances assumed     | 1.854  | .174  | -4.039 | 636     | <.001 | <.001 | -.133707 | .033104 | -.198715 | -.068700 |
|                                       | Equal variances not assumed |        |       | -4.010 | 597.284 | <.001 | <.001 | -.133707 | .033345 | -.199195 | -.068220 |
| rh_paracentral_thickness              | Equal variances assumed     | 7.840  | .005  | -.197  | 636     | .422  | .844  | -.003936 | .020020 | -.043249 | .035377  |
|                                       | Equal variances not assumed |        |       | -.192  | 527.660 | .424  | .848  | -.003936 | .020520 | -.044247 | .036375  |
| rh_parsopercularis_thickness          | Equal variances assumed     | 15.314 | <.001 | -1.550 | 636     | .061  | .122  | -.029079 | .018763 | -.065923 | .007766  |
|                                       | Equal variances not assumed |        |       | -1.518 | 543.948 | .065  | .130  | -.029079 | .019160 | -.066715 | .008558  |
| rh_parsorbitalis_thickness            | Equal variances assumed     | 17.623 | <.001 | -.506  | 636     | .307  | .613  | -.013927 | .027525 | -.067978 | .040125  |
|                                       | Equal variances not assumed |        |       | -.496  | 545.154 | .310  | .620  | -.013927 | .028100 | -.069125 | .041272  |
| rh_parstriangularis_thickness         | Equal variances assumed     | 10.361 | .001  | -.365  | 636     | .358  | .716  | -.007387 | .020259 | -.047169 | .032396  |
|                                       | Equal variances not assumed |        |       | -.357  | 548.332 | .360  | .721  | -.007387 | .020667 | -.047982 | .033209  |
| rh_pericalcarine_thickness            | Equal variances assumed     | 7.238  | .007  | 2.266  | 636     | .012  | .024  | .040989  | .018085 | .005474  | .076503  |
|                                       | Equal variances not assumed |        |       | 2.246  | 591.273 | .013  | .025  | .040989  | .018249 | .005148  | .076829  |
| rh_postcentral_thickness              | Equal variances assumed     | 5.414  | .020  | .942   | 636     | .173  | .346  | .013337  | .014151 | -.014451 | .041125  |
|                                       | Equal variances not assumed |        |       | .931   | 577.733 | .176  | .352  | .013337  | .014332 | -.014812 | .041485  |
| rh_posteriorcingulate_thickness       | Equal variances assumed     | 6.322  | .012  | -2.071 | 636     | .019  | .039  | -.039540 | .019088 | -.077023 | -.002057 |
|                                       | Equal variances not assumed |        |       | -2.044 | 576.091 | .021  | .041  | -.039540 | .019340 | -.077526 | -.001554 |
| rh_precentral_thickness               | Equal variances assumed     | 7.860  | .005  | -1.718 | 636     | .043  | .086  | -.028245 | .016444 | -.060537 | .004046  |
|                                       | Equal variances not assumed |        |       | -1.695 | 574.593 | .045  | .091  | -.028245 | .016668 | -.060983 | .004492  |
| rh_precuneus_thickness                | Equal variances assumed     | 9.537  | .002  | -.553  | 636     | .290  | .581  | -.008582 | .015522 | -.039063 | .021899  |
|                                       | Equal variances not assumed |        |       | -.543  | 559.037 | .294  | .587  | -.008582 | .015794 | -.039606 | .022442  |
| rh_rostralanteriorcingulate_thickness | Equal variances assumed     | 3.076  | .080  | -4.447 | 636     | <.001 | <.001 | -.135009 | .030362 | -.194631 | -.075388 |
|                                       | Equal variances not assumed |        |       | -4.377 | 565.320 | <.001 | <.001 | -.135009 | .030847 | -.195598 | -.074421 |
| rh_rostralmiddlefrontal_thickness     | Equal variances assumed     | 11.332 | <.001 | 1.684  | 636     | .046  | .093  | .034115  | .020253 | -.005656 | .073886  |
|                                       | Equal variances not assumed |        |       | 1.659  | 567.222 | .049  | .098  | .034115  | .020567 | -.006281 | .074512  |
| rh_superiorfrontal_thickness          | Equal variances assumed     | 8.286  | .004  | -.383  | 636     | .351  | .702  | -.008312 | .021691 | -.050907 | .034283  |
|                                       | Equal variances not assumed |        |       | -.377  | 560.982 | .353  | .706  | -.008312 | .022061 | -.051645 | .035020  |
| rh_superiorparietal_thickness         | Equal variances assumed     | 7.714  | .006  | -.078  | 636     | .469  | .938  | -.001115 | .014377 | -.029347 | .027117  |

|                                      |                             |        |       |        |         |       |       |            |           |            |           |
|--------------------------------------|-----------------------------|--------|-------|--------|---------|-------|-------|------------|-----------|------------|-----------|
|                                      | Equal variances not assumed |        |       | -.076  | 572.751 | .470  | .939  | -.001115   | .014580   | -.029751   | .027521   |
| rh_superiortemporal_thickness        | Equal variances assumed     | 9.805  | .002  | -2.687 | 636     | .004  | .007  | -.064409   | .023971   | -.111480   | -.017338  |
|                                      | Equal variances not assumed |        |       | -2.643 | 562.772 | .004  | .008  | -.064409   | .024369   | -.112274   | -.016544  |
| rh_supramarginal_thickness           | Equal variances assumed     | 19.593 | <.001 | -1.272 | 636     | .102  | .204  | -.023808   | .018710   | -.060548   | .012932   |
|                                      | Equal variances not assumed |        |       | -1.245 | 540.670 | .107  | .214  | -.023808   | .019120   | -.061367   | .013751   |
| rh_frontalpole_thickness             | Equal variances assumed     | 3.680  | .056  | 2.121  | 636     | .017  | .034  | .075142    | .035433   | .005562    | .144722   |
|                                      | Equal variances not assumed |        |       | 2.095  | 579.011 | .018  | .037  | .075142    | .035874   | .004683    | .145601   |
| rh_temporalpole_thickness            | Equal variances assumed     | 9.088  | .003  | -2.698 | 636     | .004  | .007  | -.117571   | .043585   | -.203159   | -.031983  |
|                                      | Equal variances not assumed |        |       | -2.669 | 584.837 | .004  | .008  | -.117571   | .044059   | -.204103   | -.031039  |
| rh_transversetemporal_thickness      | Equal variances assumed     | 3.412  | .065  | -1.723 | 636     | .043  | .085  | -.040207   | .023334   | -.086028   | .005613   |
|                                      | Equal variances not assumed |        |       | -1.711 | 597.343 | .044  | .088  | -.040207   | .023503   | -.086366   | .005951   |
| rh_insula_thickness                  | Equal variances assumed     | 16.840 | <.001 | -3.814 | 636     | <.001 | <.001 | -.081559   | .021384   | -.123550   | -.039567  |
|                                      | Equal variances not assumed |        |       | -3.728 | 536.222 | <.001 | <.001 | -.081559   | .021875   | -.124530   | -.038587  |
| rh_MeanThickness_thickness           | Equal variances assumed     | 18.747 | <.001 | -1.610 | 636     | .054  | .108  | -.02162382 | .01343384 | -.04800386 | .00475622 |
|                                      | Equal variances not assumed |        |       | -1.569 | 525.032 | .059  | .117  | -.02162382 | .01377755 | -.04868971 | .00544206 |
| lh_bankssts_thickness                | Equal variances assumed     | 9.103  | .003  | -2.119 | 636     | .017  | .034  | -.049904   | .023550   | -.096150   | -.003658  |
|                                      | Equal variances not assumed |        |       | -2.076 | 546.773 | .019  | .038  | -.049904   | .024033   | -.097113   | -.002695  |
| lh_caudalanteriorcingulate_thickness | Equal variances assumed     | 5.254  | .022  | -3.485 | 636     | <.001 | <.001 | -.104823   | .030079   | -.163889   | -.045757  |
|                                      | Equal variances not assumed |        |       | -3.414 | 545.151 | <.001 | <.001 | -.104823   | .030707   | -.165142   | -.044504  |
| lh_caudalmiddlefrontal_thickness     | Equal variances assumed     | 4.950  | .026  | -.584  | 636     | .280  | .559  | -.011724   | .020077   | -.051149   | .027701   |
|                                      | Equal variances not assumed |        |       | -.577  | 583.680 | .282  | .564  | -.011724   | .020301   | -.051597   | .028149   |
| lh_cuneus_thickness                  | Equal variances assumed     | .525   | .469  | 2.371  | 636     | .009  | .018  | .040785    | .017198   | .007013    | .074556   |
|                                      | Equal variances not assumed |        |       | 2.361  | 606.528 | .009  | .019  | .040785    | .017272   | .006864    | .074705   |
| lh_entorhinal_thickness              | Equal variances assumed     | 11.287 | <.001 | -2.447 | 636     | .007  | .015  | -.115657   | .047256   | -.208453   | -.022861  |
|                                      | Equal variances not assumed |        |       | -2.411 | 568.954 | .008  | .016  | -.115657   | .047967   | -.209872   | -.021442  |
| lh_fusiform_thickness                | Equal variances assumed     | 14.440 | <.001 | -3.523 | 636     | <.001 | <.001 | -.072387   | .020549   | -.112739   | -.032035  |
|                                      | Equal variances not assumed |        |       | -3.449 | 543.284 | <.001 | <.001 | -.072387   | .020987   | -.113613   | -.031160  |
| lh_inferiorparietal_thickness        | Equal variances assumed     | 13.338 | <.001 | -1.433 | 636     | .076  | .152  | -.023734   | .016561   | -.056255   | .008788   |
|                                      | Equal variances not assumed |        |       | -1.404 | 546.899 | .080  | .161  | -.023734   | .016900   | -.056932   | .009464   |
| lh_inferiortemporal_thickness        | Equal variances assumed     | 22.614 | <.001 | -2.492 | 636     | .006  | .013  | -.057749   | .023172   | -.103252   | -.012245  |
|                                      | Equal variances not assumed |        |       | -2.433 | 530.597 | .008  | .015  | -.057749   | .023735   | -.104375   | -.011122  |
| lh_isthmuscingulate_thickness        | Equal variances assumed     | .736   | .391  | -.471  | 636     | .319  | .638  | -.009895   | .021013   | -.051157   | .031368   |
|                                      | Equal variances not assumed |        |       | -.469  | 608.470 | .320  | .639  | -.009895   | .021089   | -.051311   | .031522   |

|                                       |                             |        |       |        |         |       |       |          |         |          |          |
|---------------------------------------|-----------------------------|--------|-------|--------|---------|-------|-------|----------|---------|----------|----------|
| lh_lateraloccipital_thickness         | Equal variances assumed     | 1.046  | .307  | 1.207  | 636     | .114  | .228  | .016567  | .013726 | -.010388 | .043521  |
|                                       | Equal variances not assumed |        |       | 1.199  | 599.573 | .115  | .231  | .016567  | .013816 | -.010567 | .043701  |
| lh_lateralorbitofrontal_thickness     | Equal variances assumed     | 12.535 | <.001 | .338   | 636     | .368  | .736  | .007420  | .021971 | -.035724 | .050564  |
|                                       | Equal variances not assumed |        |       | .330   | 540.283 | .371  | .741  | .007420  | .022455 | -.036690 | .051530  |
| lh_lingual_thickness                  | Equal variances assumed     | .308   | .579  | .233   | 636     | .408  | .816  | .003476  | .014952 | -.025885 | .032838  |
|                                       | Equal variances not assumed |        |       | .232   | 614.825 | .408  | .816  | .003476  | .014972 | -.025926 | .032878  |
| lh_medialorbitofrontal_thickness      | Equal variances assumed     | 9.753  | .002  | .579   | 636     | .281  | .563  | .012002  | .020720 | -.028686 | .052690  |
|                                       | Equal variances not assumed |        |       | .569   | 560.555 | .285  | .569  | .012002  | .021076 | -.029396 | .053399  |
| lh_middletemporal_thickness           | Equal variances assumed     | 6.766  | .010  | -2.362 | 636     | .009  | .018  | -.062199 | .026336 | -.113915 | -.010484 |
|                                       | Equal variances not assumed |        |       | -2.326 | 567.900 | .010  | .020  | -.062199 | .026739 | -.114720 | -.009679 |
| lh_parahippocampal_thickness          | Equal variances assumed     | 6.381  | .012  | -5.247 | 636     | <.001 | <.001 | -.152796 | .029122 | -.209984 | -.095608 |
|                                       | Equal variances not assumed |        |       | -5.159 | 560.994 | <.001 | <.001 | -.152796 | .029619 | -.210974 | -.094618 |
| lh_paracentral_thickness              | Equal variances assumed     | 2.375  | .124  | -.148  | 636     | .441  | .882  | -.002690 | .018154 | -.038339 | .032959  |
|                                       | Equal variances not assumed |        |       | -.147  | 600.571 | .441  | .883  | -.002690 | .018267 | -.038566 | .033186  |
| lh_parsopercularis_thickness          | Equal variances assumed     | 9.959  | .002  | -1.410 | 636     | .079  | .159  | -.026577 | .018847 | -.063586 | .010433  |
|                                       | Equal variances not assumed |        |       | -1.382 | 548.396 | .084  | .167  | -.026577 | .019226 | -.064342 | .011189  |
| lh_parsorbitalis_thickness            | Equal variances assumed     | 14.005 | <.001 | .729   | 636     | .233  | .467  | .019906  | .027321 | -.033744 | .073556  |
|                                       | Equal variances not assumed |        |       | .717   | 564.646 | .237  | .474  | .019906  | .027762 | -.034623 | .074436  |
| lh_parstriangularis_thickness         | Equal variances assumed     | 14.689 | <.001 | .014   | 636     | .494  | .989  | .000299  | .020999 | -.040936 | .041534  |
|                                       | Equal variances not assumed |        |       | .014   | 545.157 | .494  | .989  | .000299  | .021437 | -.041811 | .042408  |
| lh_pericalcarine_thickness            | Equal variances assumed     | 1.649  | .200  | 2.121  | 636     | .017  | .034  | .037740  | .017796 | .002794  | .072686  |
|                                       | Equal variances not assumed |        |       | 2.102  | 592.427 | .018  | .036  | .037740  | .017951 | .002485  | .072996  |
| lh_postcentral_thickness              | Equal variances assumed     | .000   | .989  | 1.514  | 636     | .065  | .130  | .021443  | .014162 | -.006367 | .049252  |
|                                       | Equal variances not assumed |        |       | 1.516  | 620.441 | .065  | .130  | .021443  | .014148 | -.006340 | .049226  |
| lh_posteriorcingulate_thickness       | Equal variances assumed     | 3.242  | .072  | -2.118 | 636     | .017  | .035  | -.042319 | .019979 | -.081551 | -.003087 |
|                                       | Equal variances not assumed |        |       | -2.092 | 578.914 | .018  | .037  | -.042319 | .020228 | -.082048 | -.002591 |
| lh_precentral_thickness               | Equal variances assumed     | 4.895  | .027  | -1.447 | 636     | .074  | .149  | -.024378 | .016852 | -.057470 | .008714  |
|                                       | Equal variances not assumed |        |       | -1.432 | 588.241 | .076  | .153  | -.024378 | .017019 | -.057803 | .009048  |
| lh_precuneus_thickness                | Equal variances assumed     | 1.580  | .209  | .623   | 636     | .267  | .534  | .010216  | .016403 | -.021995 | .042427  |
|                                       | Equal variances not assumed |        |       | .618   | 597.343 | .268  | .537  | .010216  | .016522 | -.022232 | .042665  |
| lh_rostralanteriorcingulate_thickness | Equal variances assumed     | 7.104  | .008  | -3.060 | 636     | .001  | .002  | -.091771 | .029992 | -.150667 | -.032875 |
|                                       | Equal variances not assumed |        |       | -3.007 | 558.926 | .001  | .003  | -.091771 | .030519 | -.151717 | -.031825 |
| lh_rostralmiddlefrontal_thickness     | Equal variances assumed     | 11.368 | <.001 | 2.179  | 636     | .015  | .030  | .041953  | .019257 | .004138  | .079768  |
|                                       | Equal variances not assumed |        |       | 2.145  | 566.215 | .016  | .032  | .041953  | .019561 | .003533  | .080373  |

|                                   |                             |        |       |        |         |       |       |            |           |            |           |
|-----------------------------------|-----------------------------|--------|-------|--------|---------|-------|-------|------------|-----------|------------|-----------|
| lh_superiorfrontal_thickness      | Equal variances assumed     | 15.789 | <.001 | -.546  | 636     | .293  | .586  | -.011184   | .020500   | -.051440   | .029072   |
|                                   | Equal variances not assumed |        |       | -.534  | 540.981 | .297  | .594  | -.011184   | .020949   | -.052335   | .029966   |
| lh_superiorparietal_thickness     | Equal variances assumed     | 4.133  | .042  | 1.450  | 636     | .074  | .148  | .020886    | .014403   | -.007398   | .049170   |
|                                   | Equal variances not assumed |        |       | 1.433  | 581.783 | .076  | .152  | .020886    | .014572   | -.007734   | .049506   |
| lh_superiortemporal_thickness     | Equal variances assumed     | 11.079 | <.001 | -1.637 | 636     | .051  | .102  | -.039402   | .024073   | -.086674   | .007869   |
|                                   | Equal variances not assumed |        |       | -1.606 | 550.973 | .054  | .109  | -.039402   | .024542   | -.087610   | .008805   |
| lh_supramarginal_thickness        | Equal variances assumed     | 12.890 | <.001 | -1.069 | 636     | .143  | .286  | -.020004   | .018719   | -.056762   | .016754   |
|                                   | Equal variances not assumed |        |       | -1.048 | 550.310 | .148  | .295  | -.020004   | .019087   | -.057496   | .017488   |
| lh_frontalpole_thickness          | Equal variances assumed     | 1.163  | .281  | 1.237  | 636     | .108  | .217  | .043244    | .034967   | -.025421   | .111910   |
|                                   | Equal variances not assumed |        |       | 1.232  | 608.333 | .109  | .218  | .043244    | .035096   | -.025680   | .112169   |
| lh_temporalpole_thickness         | Equal variances assumed     | .613   | .434  | -1.732 | 636     | .042  | .084  | -.081336   | .046958   | -.173547   | .010876   |
|                                   | Equal variances not assumed |        |       | -1.724 | 606.035 | .043  | .085  | -.081336   | .047168   | -.173968   | .011297   |
| lh_transversetemporal_thickness   | Equal variances assumed     | 2.484  | .116  | -1.932 | 636     | .027  | .054  | -.046609   | .024125   | -.093982   | .000764   |
|                                   | Equal variances not assumed |        |       | -1.918 | 596.472 | .028  | .056  | -.046609   | .024306   | -.094344   | .001126   |
| lh_insula_thickness               | Equal variances assumed     | 22.529 | <.001 | -3.546 | 636     | <.001 | <.001 | -.076459   | .021563   | -.118802   | -.034115  |
|                                   | Equal variances not assumed |        |       | -3.451 | 517.096 | <.001 | <.001 | -.076459   | .022154   | -.119982   | -.032935  |
| lh_MeanThickness_thickness        | Equal variances assumed     | 17.319 | <.001 | -.930  | 636     | .176  | .353  | -.01247102 | .01340423 | -.03879292 | .01385087 |
|                                   | Equal variances not assumed |        |       | -.909  | 535.418 | .182  | .364  | -.01247102 | .01371493 | -.03941269 | .01447064 |
| lh_bankssts_volume                | Equal variances assumed     | 6.070  | .014  | -1.909 | 636     | .028  | .057  | -101.450   | 53.149    | -205.819   | 2.920     |
|                                   | Equal variances not assumed |        |       | -1.886 | 580.813 | .030  | .060  | -101.450   | 53.785    | -207.086   | 4.187     |
| lh_caudalanteriorcingulate_volume | Equal variances assumed     | 5.227  | .023  | -3.032 | 636     | .001  | .003  | -151.407   | 49.933    | -249.461   | -53.354   |
|                                   | Equal variances not assumed |        |       | -2.983 | 563.906 | .001  | .003  | -151.407   | 50.749    | -251.087   | -51.728   |
| lh_caudalmiddlefrontal_volume     | Equal variances assumed     | 14.499 | <.001 | -1.030 | 636     | .152  | .304  | -133.658   | 129.801   | -388.548   | 121.232   |
|                                   | Equal variances not assumed |        |       | -1.008 | 543.731 | .157  | .314  | -133.658   | 132.556   | -394.043   | 126.727   |
| lh_cuneus_volume                  | Equal variances assumed     | 3.587  | .059  | .523   | 636     | .301  | .601  | 31.198     | 59.687    | -86.009    | 148.405   |
|                                   | Equal variances not assumed |        |       | .517   | 582.858 | .303  | .605  | 31.198     | 60.368    | -87.367    | 149.763   |
| lh_entorhinal_volume              | Equal variances assumed     | 1.833  | .176  | -2.859 | 636     | .002  | .004  | -120.292   | 42.075    | -202.914   | -37.670   |
|                                   | Equal variances not assumed |        |       | -2.858 | 617.396 | .002  | .004  | -120.292   | 42.087    | -202.943   | -37.641   |
| lh_fusiform_volume                | Equal variances assumed     | 6.744  | .010  | -2.596 | 636     | .005  | .010  | -490.688   | 189.002   | -861.831   | -119.544  |
|                                   | Equal variances not assumed |        |       | -2.566 | 581.522 | .005  | .011  | -490.688   | 191.226   | -866.265   | -115.110  |
| lh_inferiorparietal_volume        | Equal variances assumed     | 3.797  | .052  | -2.000 | 636     | .023  | .046  | -565.998   | 282.949   | -1121.625  | -10.372   |
|                                   | Equal variances not assumed |        |       | -1.982 | 591.138 | .024  | .048  | -565.998   | 285.519   | -1126.753  | -5.244    |
| lh_inferiortemporal_volume        | Equal variances assumed     | 10.137 | .002  | -2.350 | 636     | .010  | .019  | -523.190   | 222.664   | -960.436   | -85.944   |

|                                    |                             |        |       |        |         |       |       |          |         |           |          |
|------------------------------------|-----------------------------|--------|-------|--------|---------|-------|-------|----------|---------|-----------|----------|
|                                    | Equal variances not assumed |        |       | -2.310 | 560.578 | .011  | .021  | -523.190 | 226.485 | -968.053  | -78.327  |
| lh_isthmuscingulate_volume         | Equal variances assumed     | 2.455  | .118  | .167   | 636     | .434  | .868  | 9.018    | 54.146  | -97.310   | 115.345  |
|                                    | Equal variances not assumed |        |       | .165   | 586.646 | .435  | .869  | 9.018    | 54.707  | -98.428   | 116.464  |
| lh_lateraloccipital_volume         | Equal variances assumed     | 6.505  | .011  | .706   | 636     | .240  | .480  | 121.257  | 171.698 | -215.906  | 458.420  |
|                                    | Equal variances not assumed |        |       | .696   | 571.279 | .243  | .487  | 121.257  | 174.182 | -220.857  | 463.372  |
| lh_lateralorbitofrontal_volume     | Equal variances assumed     | 22.637 | <.001 | -3.524 | 636     | <.001 | <.001 | -460.532 | 130.682 | -717.153  | -203.911 |
|                                    | Equal variances not assumed |        |       | -3.428 | 513.931 | <.001 | <.001 | -460.532 | 134.358 | -724.491  | -196.573 |
| lh_lingual_volume                  | Equal variances assumed     | 3.786  | .052  | -2.855 | 636     | .002  | .004  | -362.519 | 126.994 | -611.897  | -113.141 |
|                                    | Equal variances not assumed |        |       | -2.817 | 575.852 | .003  | .005  | -362.519 | 128.680 | -615.259  | -109.779 |
| lh_medialorbitofrontal_volume      | Equal variances assumed     | 7.841  | .005  | -2.814 | 636     | .003  | .005  | -239.462 | 85.109  | -406.591  | -72.334  |
|                                    | Equal variances not assumed |        |       | -2.761 | 552.624 | .003  | .006  | -239.462 | 86.735  | -409.832  | -69.092  |
| lh_middletemporal_volume           | Equal variances assumed     | 4.653  | .031  | -2.604 | 636     | .005  | .009  | -629.539 | 241.756 | -1104.276 | -154.803 |
|                                    | Equal variances not assumed |        |       | -2.578 | 587.361 | .005  | .010  | -629.539 | 244.212 | -1109.174 | -149.905 |
| lh_parahippocampal_volume          | Equal variances assumed     | 1.022  | .312  | -2.830 | 636     | .002  | .005  | -119.844 | 42.351  | -203.010  | -36.679  |
|                                    | Equal variances not assumed |        |       | -2.799 | 585.020 | .003  | .005  | -119.844 | 42.809  | -203.923  | -35.766  |
| lh_paracentral_volume              | Equal variances assumed     | 14.506 | <.001 | 1.238  | 636     | .108  | .216  | 82.514   | 66.633  | -48.333   | 213.361  |
|                                    | Equal variances not assumed |        |       | 1.211  | 537.182 | .113  | .227  | 82.514   | 68.150  | -51.359   | 216.387  |
| lh_parsopercularis_volume          | Equal variances assumed     | 7.985  | .005  | -.780  | 636     | .218  | .435  | -68.464  | 87.725  | -240.731  | 103.802  |
|                                    | Equal variances not assumed |        |       | -.768  | 566.697 | .221  | .443  | -68.464  | 89.097  | -243.465  | 106.536  |
| lh_parsorbitalis_volume            | Equal variances assumed     | 7.228  | .007  | -1.592 | 636     | .056  | .112  | -86.496  | 54.338  | -193.200  | 20.209   |
|                                    | Equal variances not assumed |        |       | -1.569 | 571.035 | .059  | .117  | -86.496  | 55.128  | -194.774  | 21.782   |
| lh_parstriangularis_volume         | Equal variances assumed     | 3.115  | .078  | -1.480 | 636     | .070  | .139  | -138.115 | 93.293  | -321.315  | 45.084   |
|                                    | Equal variances not assumed |        |       | -1.470 | 597.456 | .071  | .142  | -138.115 | 93.966  | -322.659  | 46.428   |
| lh_pericalcarine_volume            | Equal variances assumed     | .350   | .554  | -2.069 | 636     | .019  | .039  | -92.671  | 44.795  | -180.635  | -4.706   |
|                                    | Equal variances not assumed |        |       | -2.058 | 604.103 | .020  | .040  | -92.671  | 45.024  | -181.094  | -4.248   |
| lh_postcentral_volume              | Equal variances assumed     | 1.462  | .227  | -.028  | 636     | .489  | .978  | -4.138   | 147.512 | -293.807  | 285.530  |
|                                    | Equal variances not assumed |        |       | -.028  | 591.409 | .489  | .978  | -4.138   | 148.840 | -296.458  | 288.181  |
| lh_posteriorcingulate_volume       | Equal variances assumed     | 3.968  | .047  | -2.765 | 636     | .003  | .006  | -167.413 | 60.542  | -286.299  | -48.527  |
|                                    | Equal variances not assumed |        |       | -2.731 | 578.136 | .003  | .007  | -167.413 | 61.309  | -287.828  | -46.997  |
| lh_precentral_volume               | Equal variances assumed     | 8.488  | .004  | -.861  | 636     | .195  | .389  | -162.501 | 188.684 | -533.020  | 208.017  |
|                                    | Equal variances not assumed |        |       | -.846  | 558.686 | .199  | .398  | -162.501 | 192.010 | -539.650  | 214.647  |
| lh_precuneus_volume                | Equal variances assumed     | 6.742  | .010  | .441   | 636     | .330  | .659  | 73.407   | 166.269 | -253.095  | 399.909  |
|                                    | Equal variances not assumed |        |       | .434   | 561.326 | .332  | .664  | 73.407   | 169.091 | -258.722  | 405.536  |
| lh_rostralanteriorcingulate_volume | Equal variances assumed     | 4.712  | .030  | -4.210 | 636     | <.001 | <.001 | -243.347 | 57.797  | -356.844  | -129.851 |



|                                   |                             |        |       |        |         |       |       |          |         |           |          |
|-----------------------------------|-----------------------------|--------|-------|--------|---------|-------|-------|----------|---------|-----------|----------|
|                                   | Equal variances not assumed |        |       | -4.166 | 585.951 | <.001 | <.001 | -243.347 | 58.407  | -358.060  | -128.634 |
| lh_rostralmiddlefrontal_volume    | Equal variances assumed     | 11.858 | <.001 | -.415  | 636     | .339  | .678  | -128.019 | 308.118 | -733.071  | 477.033  |
|                                   | Equal variances not assumed |        |       | -.407  | 545.872 | .342  | .684  | -128.019 | 314.502 | -745.801  | 489.764  |
| lh_superiorfrontal_volume         | Equal variances assumed     | 12.394 | <.001 | -1.042 | 636     | .149  | .298  | -348.745 | 334.813 | -1006.218 | 308.728  |
|                                   | Equal variances not assumed |        |       | -1.013 | 514.579 | .156  | .311  | -348.745 | 344.182 | -1024.919 | 327.430  |
| lh_superiorparietal_volume        | Equal variances assumed     | 13.610 | <.001 | -.254  | 636     | .400  | .800  | -50.109  | 197.328 | -437.602  | 337.384  |
|                                   | Equal variances not assumed |        |       | -.249  | 545.267 | .402  | .804  | -50.109  | 201.445 | -445.811  | 345.594  |
| lh_superiortemporal_volume        | Equal variances assumed     | 8.415  | .004  | -.348  | 636     | .364  | .728  | -76.927  | 220.822 | -510.555  | 356.701  |
|                                   | Equal variances not assumed |        |       | -.343  | 565.612 | .366  | .732  | -76.927  | 224.334 | -517.558  | 363.703  |
| lh_supramarginal_volume           | Equal variances assumed     | 4.247  | .040  | -.064  | 636     | .475  | .949  | -12.270  | 192.558 | -390.397  | 365.857  |
|                                   | Equal variances not assumed |        |       | -.063  | 575.619 | .475  | .950  | -12.270  | 195.127 | -395.518  | 370.978  |
| lh_frontalpole_volume             | Equal variances assumed     | 16.953 | <.001 | 1.651  | 636     | .050  | .099  | 43.725   | 26.481  | -8.276    | 95.727   |
|                                   | Equal variances not assumed |        |       | 1.621  | 553.960 | .053  | .106  | 43.725   | 26.979  | -9.268    | 96.718   |
| lh_temporalpole_volume            | Equal variances assumed     | 1.631  | .202  | -1.689 | 636     | .046  | .092  | -87.975  | 52.076  | -190.237  | 14.287   |
|                                   | Equal variances not assumed |        |       | -1.682 | 606.321 | .047  | .093  | -87.975  | 52.304  | -190.694  | 14.744   |
| lh_transversetemporal_volume      | Equal variances assumed     | 2.621  | .106  | .474   | 636     | .318  | .636  | 11.959   | 25.241  | -37.606   | 61.525   |
|                                   | Equal variances not assumed |        |       | .467   | 571.469 | .320  | .641  | 11.959   | 25.605  | -38.332   | 62.250   |
| lh_insula_volume                  | Equal variances assumed     | 8.117  | .005  | -2.710 | 636     | .003  | .007  | -267.823 | 98.816  | -461.868  | -73.778  |
|                                   | Equal variances not assumed |        |       | -2.671 | 570.295 | .004  | .008  | -267.823 | 100.270 | -464.768  | -70.879  |
| rh_bankssts_volume                | Equal variances assumed     | 5.851  | .016  | -1.677 | 636     | .047  | .094  | -97.387  | 58.064  | -211.407  | 16.634   |
|                                   | Equal variances not assumed |        |       | -1.653 | 569.432 | .049  | .099  | -97.387  | 58.931  | -213.136  | 18.363   |
| rh_caudalanteriorcingulate_volume | Equal variances assumed     | 4.901  | .027  | -2.957 | 636     | .002  | .003  | -142.490 | 48.183  | -237.108  | -47.872  |
|                                   | Equal variances not assumed |        |       | -2.927 | 587.328 | .002  | .004  | -142.490 | 48.673  | -238.085  | -46.895  |
| rh_caudalmiddlefrontal_volume     | Equal variances assumed     | 6.330  | .012  | -1.722 | 636     | .043  | .086  | -219.702 | 127.604 | -470.278  | 30.874   |
|                                   | Equal variances not assumed |        |       | -1.696 | 569.282 | .045  | .090  | -219.702 | 129.515 | -474.089  | 34.685   |
| rh_cuneus_volume                  | Equal variances assumed     | .422   | .516  | .155   | 636     | .438  | .876  | 8.940    | 57.503  | -103.978  | 121.859  |
|                                   | Equal variances not assumed |        |       | .155   | 606.080 | .439  | .877  | 8.940    | 57.759  | -104.492  | 122.373  |
| rh_entorhinal_volume              | Equal variances assumed     | .121   | .728  | -2.961 | 636     | .002  | .003  | -136.426 | 46.080  | -226.914  | -45.939  |
|                                   | Equal variances not assumed |        |       | -2.993 | 634.906 | .001  | .003  | -136.426 | 45.584  | -225.940  | -46.913  |
| rh_fusiform_volume                | Equal variances assumed     | 11.442 | <.001 | -3.347 | 636     | <.001 | <.001 | -651.278 | 194.571 | -1033.358 | -269.199 |
|                                   | Equal variances not assumed |        |       | -3.301 | 573.397 | <.001 | .001  | -651.278 | 197.279 | -1038.757 | -263.800 |
| rh_inferiorparietal_volume        | Equal variances assumed     | 4.541  | .033  | -.617  | 636     | .269  | .537  | -162.253 | 262.981 | -678.668  | 354.163  |
|                                   | Equal variances not assumed |        |       | -.609  | 578.622 | .271  | .543  | -162.253 | 266.280 | -685.246  | 360.741  |
| rh_inferiortemporal_volume        | Equal variances assumed     | 7.499  | .006  | -2.287 | 636     | .011  | .023  | -519.809 | 227.334 | -966.225  | -73.393  |



|                                    |                             |        |       |        |         |       |       |          |         |           |          |
|------------------------------------|-----------------------------|--------|-------|--------|---------|-------|-------|----------|---------|-----------|----------|
|                                    | Equal variances not assumed |        |       | -2.262 | 584.362 | .012  | .024  | -519.809 | 229.833 | -971.208  | -68.410  |
| rh_isthmuscingulate_volume         | Equal variances assumed     | .372   | .542  | -.459  | 636     | .323  | .646  | -24.831  | 54.078  | -131.025  | 81.363   |
|                                    | Equal variances not assumed |        |       | -.458  | 609.280 | .324  | .647  | -24.831  | 54.260  | -131.390  | 81.728   |
| rh_lateraloccipital_volume         | Equal variances assumed     | 2.280  | .132  | .963   | 636     | .168  | .336  | 161.962  | 168.216 | -168.364  | 492.288  |
|                                    | Equal variances not assumed |        |       | .956   | 596.442 | .170  | .340  | 161.962  | 169.481 | -170.889  | 494.813  |
| rh_lateralorbitofrontal_volume     | Equal variances assumed     | 15.841 | <.001 | -3.503 | 636     | <.001 | <.001 | -452.642 | 129.202 | -706.355  | -198.928 |
|                                    | Equal variances not assumed |        |       | -3.431 | 543.909 | <.001 | <.001 | -452.642 | 131.939 | -711.814  | -193.470 |
| rh_lingual_volume                  | Equal variances assumed     | 1.234  | .267  | -1.531 | 636     | .063  | .126  | -193.945 | 126.675 | -442.697  | 54.807   |
|                                    | Equal variances not assumed |        |       | -1.518 | 592.337 | .065  | .130  | -193.945 | 127.782 | -444.905  | 57.015   |
| rh_medialorbitofrontal_volume      | Equal variances assumed     | 5.943  | .015  | -1.534 | 636     | .063  | .126  | -121.066 | 78.936  | -276.072  | 33.941   |
|                                    | Equal variances not assumed |        |       | -1.506 | 555.839 | .066  | .133  | -121.066 | 80.382  | -278.956  | 36.825   |
| rh_middletemporal_volume           | Equal variances assumed     | 7.771  | .005  | -3.219 | 636     | <.001 | .001  | -739.709 | 229.819 | -1191.005 | -288.413 |
|                                    | Equal variances not assumed |        |       | -3.181 | 581.292 | <.001 | .002  | -739.709 | 232.538 | -1196.426 | -282.992 |
| rh_parahippocampal_volume          | Equal variances assumed     | .006   | .940  | -3.756 | 636     | <.001 | <.001 | -166.870 | 44.422  | -254.101  | -79.639  |
|                                    | Equal variances not assumed |        |       | -3.775 | 628.213 | <.001 | <.001 | -166.870 | 44.201  | -253.669  | -80.070  |
| rh_paracentral_volume              | Equal variances assumed     | 9.057  | .003  | 1.569  | 636     | .059  | .117  | 103.750  | 66.119  | -26.088   | 233.587  |
|                                    | Equal variances not assumed |        |       | 1.543  | 560.635 | .062  | .123  | 103.750  | 67.253  | -28.348   | 235.848  |
| rh_parsopercularis_volume          | Equal variances assumed     | 5.158  | .023  | -2.142 | 636     | .016  | .033  | -224.697 | 104.888 | -430.666  | -18.729  |
|                                    | Equal variances not assumed |        |       | -2.120 | 586.984 | .017  | .034  | -224.697 | 105.965 | -432.813  | -16.581  |
| rh_parsorbitalis_volume            | Equal variances assumed     | 2.721  | .100  | -1.157 | 636     | .124  | .248  | -59.569  | 51.500  | -160.699  | 41.561   |
|                                    | Equal variances not assumed |        |       | -1.146 | 589.606 | .126  | .252  | -59.569  | 51.990  | -161.677  | 42.540   |
| rh_parstriangularis_volume         | Equal variances assumed     | 4.865  | .028  | -1.541 | 636     | .062  | .124  | -132.353 | 85.882  | -301.000  | 36.294   |
|                                    | Equal variances not assumed |        |       | -1.521 | 576.232 | .064  | .129  | -132.353 | 87.014  | -303.256  | 38.551   |
| rh_pericalcarine_volume            | Equal variances assumed     | .537   | .464  | -1.733 | 636     | .042  | .084  | -74.730  | 43.120  | -159.406  | 9.945    |
|                                    | Equal variances not assumed |        |       | -1.725 | 604.933 | .043  | .085  | -74.730  | 43.329  | -159.824  | 10.363   |
| rh_postcentral_volume              | Equal variances assumed     | 9.648  | .002  | .608   | 636     | .272  | .544  | 98.130   | 161.441 | -218.891  | 415.152  |
|                                    | Equal variances not assumed |        |       | .599   | 566.852 | .275  | .550  | 98.130   | 163.959 | -223.910  | 420.171  |
| rh_posteriorcingulate_volume       | Equal variances assumed     | 6.779  | .009  | .018   | 636     | .493  | .986  | 1.074    | 60.955  | -118.624  | 120.772  |
|                                    | Equal variances not assumed |        |       | .017   | 555.754 | .493  | .986  | 1.074    | 62.073  | -120.853  | 123.002  |
| rh_precentral_volume               | Equal variances assumed     | 8.261  | .004  | -.460  | 636     | .323  | .646  | -81.342  | 176.936 | -428.791  | 266.107  |
|                                    | Equal variances not assumed |        |       | -.451  | 553.320 | .326  | .652  | -81.342  | 180.286 | -435.470  | 272.787  |
| rh_precuneus_volume                | Equal variances assumed     | 10.571 | .001  | -.576  | 636     | .282  | .565  | -93.751  | 162.771 | -413.384  | 225.883  |
|                                    | Equal variances not assumed |        |       | -.565  | 548.880 | .286  | .573  | -93.751  | 166.027 | -419.876  | 232.375  |
| rh_rostralanteriorcingulate_volume | Equal variances assumed     | 6.255  | .013  | -4.518 | 636     | <.001 | <.001 | -277.848 | 61.500  | -398.615  | -157.082 |

|                                |                             |        |       |        |         |       |       |           |          |            |          |
|--------------------------------|-----------------------------|--------|-------|--------|---------|-------|-------|-----------|----------|------------|----------|
|                                | Equal variances not assumed |        |       | -4.442 | 561.179 | <.001 | <.001 | -277.848  | 62.546   | -400.701   | -154.996 |
| rh_rostralmiddlefrontal_volume | Equal variances assumed     | 16.379 | <.001 | -.706  | 636     | .240  | .480  | -210.117  | 297.554  | -794.424   | 374.190  |
|                                | Equal variances not assumed |        |       | -.690  | 535.589 | .245  | .490  | -210.117  | 304.439  | -808.158   | 387.924  |
| rh_superiorfrontal_volume      | Equal variances assumed     | 16.426 | <.001 | -1.233 | 636     | .109  | .218  | -409.182  | 331.942  | -1061.017  | 242.653  |
|                                | Equal variances not assumed |        |       | -1.197 | 508.247 | .116  | .232  | -409.182  | 341.710  | -1080.520  | 262.156  |
| rh_superiorparietal_volume     | Equal variances assumed     | 6.138  | .013  | -.429  | 636     | .334  | .668  | -88.136   | 205.286  | -491.257   | 314.984  |
|                                | Equal variances not assumed |        |       | -.422  | 558.854 | .337  | .673  | -88.136   | 208.896  | -498.454   | 322.181  |
| rh_superiortemporal_volume     | Equal variances assumed     | 6.907  | .009  | -1.862 | 636     | .032  | .063  | -423.036  | 227.192  | -869.174   | 23.101   |
|                                | Equal variances not assumed |        |       | -1.839 | 578.952 | .033  | .066  | -423.036  | 230.023  | -874.817   | 28.744   |
| rh_supramarginal_volume        | Equal variances assumed     | 2.062  | .151  | -1.734 | 636     | .042  | .083  | -360.417  | 207.879  | -768.629   | 47.794   |
|                                | Equal variances not assumed |        |       | -1.722 | 599.586 | .043  | .085  | -360.417  | 209.241  | -771.351   | 50.517   |
| rh_frontalpole_volume          | Equal variances assumed     | .610   | .435  | 2.394  | 636     | .008  | .017  | 61.317    | 25.614   | 11.018     | 111.616  |
|                                | Equal variances not assumed |        |       | 2.375  | 595.512 | .009  | .018  | 61.317    | 25.814   | 10.619     | 112.015  |
| rh_temporalpole_volume         | Equal variances assumed     | 10.952 | <.001 | -2.076 | 636     | .019  | .038  | -111.283  | 53.610   | -216.557   | -6.010   |
|                                | Equal variances not assumed |        |       | -2.051 | 580.312 | .020  | .041  | -111.283  | 54.258   | -217.849   | -4.717   |
| rh_transversetemporal_volume   | Equal variances assumed     | 1.019  | .313  | -.751  | 636     | .227  | .453  | -22.055   | 29.377   | -79.742    | 35.633   |
|                                | Equal variances not assumed |        |       | -.748  | 606.672 | .228  | .455  | -22.055   | 29.502   | -79.993    | 35.884   |
| rh_insula_volume               | Equal variances assumed     | 4.325  | .038  | -2.507 | 636     | .006  | .012  | -238.162  | 95.017   | -424.748   | -51.577  |
|                                | Equal variances not assumed |        |       | -2.493 | 603.000 | .006  | .013  | -238.162  | 95.537   | -425.789   | -50.536  |
| LeftLateralVentricle           | Equal variances assumed     | 6.044  | .014  | 2.167  | 636     | .015  | .031  | 511.8264  | 236.1877 | 48.0244    | 975.6283 |
|                                | Equal variances not assumed |        |       | 2.134  | 567.079 | .017  | .033  | 511.8264  | 239.8574 | 40.7089    | 982.9438 |
| LeftInfLatVent                 | Equal variances assumed     | 1.496  | .222  | 1.302  | 636     | .097  | .193  | 24.4021   | 18.7464  | -12.4103   | 61.2145  |
|                                | Equal variances not assumed |        |       | 1.312  | 632.145 | .095  | .190  | 24.4021   | 18.6013  | -12.1257   | 60.9300  |
| LeftCerebellumWhiteMatter      | Equal variances assumed     | 6.024  | .014  | -.941  | 636     | .174  | .347  | -158.8470 | 168.8000 | -490.3197  | 172.6256 |
|                                | Equal variances not assumed |        |       | -.926  | 563.785 | .177  | .355  | -158.8470 | 171.5624 | -495.8265  | 178.1324 |
| LeftCerebellumCortex           | Equal variances assumed     | 3.225  | .073  | -1.242 | 636     | .107  | .215  | -643.4415 | 518.2292 | -1661.0886 | 374.2057 |
|                                | Equal variances not assumed |        |       | -1.226 | 578.994 | .110  | .221  | -643.4415 | 524.6797 | -1673.9489 | 387.0660 |
| LeftThalamusProper             | Equal variances assumed     | 1.118  | .291  | -.344  | 636     | .365  | .731  | -21.5427  | 62.6313  | -144.5319  | 101.4465 |
|                                | Equal variances not assumed |        |       | -.343  | 606.884 | .366  | .732  | -21.5427  | 62.8934  | -145.0578  | 101.9724 |
| LeftCaudate                    | Equal variances assumed     | .707   | .401  | .109   | 636     | .457  | .913  | 4.8236    | 44.2511  | -82.0723   | 91.7194  |
|                                | Equal variances not assumed |        |       | .108   | 587.400 | .457  | .914  | 4.8236    | 44.7001  | -82.9679   | 92.6150  |
| LeftPutamen                    | Equal variances assumed     | 1.614  | .204  | .965   | 636     | .167  | .335  | 67.5705   | 70.0111  | -69.9105   | 205.0514 |
|                                | Equal variances not assumed |        |       | .960   | 603.649 | .169  | .337  | 67.5705   | 70.3794  | -70.6477   | 205.7887 |

|                            |                             |       |      |        |         |       |       |           |          |            |           |
|----------------------------|-----------------------------|-------|------|--------|---------|-------|-------|-----------|----------|------------|-----------|
| LeftPallidum               | Equal variances assumed     | 1.616 | .204 | -.308  | 636     | .379  | .758  | -7.1411   | 23.2160  | -52.7304   | 38.4482   |
|                            | Equal variances not assumed |       |      | -.306  | 598.747 | .380  | .760  | -7.1411   | 23.3742  | -53.0465   | 38.7642   |
| @3rdVentricle              | Equal variances assumed     | 9.262 | .002 | 4.683  | 636     | <.001 | <.001 | 91.8116   | 19.6032  | 53.3167    | 130.3064  |
|                            | Equal variances not assumed |       |      | 4.570  | 528.323 | <.001 | <.001 | 91.8116   | 20.0899  | 52.3457    | 131.2774  |
| @4thVentricle              | Equal variances assumed     | 5.297 | .022 | 1.081  | 636     | .140  | .280  | 52.5796   | 48.6501  | -42.9546   | 148.1139  |
|                            | Equal variances not assumed |       |      | 1.065  | 568.507 | .144  | .288  | 52.5796   | 49.3884  | -44.4264   | 149.5857  |
| BrainStem                  | Equal variances assumed     | 3.461 | .063 | -2.966 | 636     | .002  | .003  | -528.1842 | 178.0932 | -877.9061  | -178.4624 |
|                            | Equal variances not assumed |       |      | -2.942 | 593.983 | .002  | .003  | -528.1842 | 179.5628 | -880.8395  | -175.5290 |
| LeftHippocampus            | Equal variances assumed     | .824  | .364 | -.360  | 636     | .360  | .719  | -16.2912  | 45.3060  | -105.2586  | 72.6761   |
|                            | Equal variances not assumed |       |      | -.357  | 598.366 | .361  | .721  | -16.2912  | 45.6200  | -105.8859  | 73.3035   |
| LeftAmygdala               | Equal variances assumed     | 3.305 | .070 | -1.427 | 636     | .077  | .154  | -31.0560  | 21.7675  | -73.8008   | 11.6888   |
|                            | Equal variances not assumed |       |      | -1.406 | 570.394 | .080  | .160  | -31.0560  | 22.0873  | -74.4384   | 12.3265   |
| CSF                        | Equal variances assumed     | 1.354 | .245 | 1.340  | 636     | .090  | .181  | 27.1960   | 20.2969  | -12.6610   | 67.0531   |
|                            | Equal variances not assumed |       |      | 1.331  | 598.303 | .092  | .184  | 27.1960   | 20.4380  | -12.9428   | 67.3349   |
| LeftAccumbensarea          | Equal variances assumed     | .003  | .960 | .798   | 636     | .213  | .425  | 9.7196    | 12.1838  | -14.2057   | 33.6449   |
|                            | Equal variances not assumed |       |      | .794   | 605.423 | .214  | .427  | 9.7196    | 12.2407  | -14.3198   | 33.7591   |
| LeftVentralDC              | Equal variances assumed     | .304  | .582 | .190   | 636     | .425  | .849  | 6.7769    | 35.6266  | -63.1831   | 76.7370   |
|                            | Equal variances not assumed |       |      | .191   | 623.525 | .424  | .849  | 6.7769    | 35.5399  | -63.0155   | 76.5694   |
| Leftvessel                 | Equal variances assumed     | .033  | .857 | -1.311 | 636     | .095  | .190  | -4.1903   | 3.1971   | -10.4685   | 2.0880    |
|                            | Equal variances not assumed |       |      | -1.320 | 631.462 | .094  | .187  | -4.1903   | 3.1742   | -10.4235   | 2.0429    |
| Leftchoroidplexus          | Equal variances assumed     | 3.051 | .081 | 1.315  | 636     | .095  | .189  | 26.6874   | 20.3013  | -13.1783   | 66.5532   |
|                            | Equal variances not assumed |       |      | 1.301  | 586.177 | .097  | .194  | 26.6874   | 20.5143  | -13.6030   | 66.9779   |
| RightLateralVentricle      | Equal variances assumed     | 5.890 | .016 | 2.591  | 636     | .005  | .010  | 607.1984  | 234.3754 | 146.9553   | 1067.4416 |
|                            | Equal variances not assumed |       |      | 2.549  | 563.256 | .006  | .011  | 607.1984  | 238.2418 | 139.2475   | 1075.1494 |
| RightInfLatVent            | Equal variances assumed     | 3.559 | .060 | 1.859  | 636     | .032  | .064  | 28.1505   | 15.1435  | -1.5869    | 57.8879   |
|                            | Equal variances not assumed |       |      | 1.840  | 586.467 | .033  | .066  | 28.1505   | 15.3012  | -1.9012    | 58.2023   |
| RightCerebellumWhiteMatter | Equal variances assumed     | 5.149 | .024 | -1.781 | 636     | .038  | .075  | -299.0484 | 167.8962 | -628.7464  | 30.6496   |
|                            | Equal variances not assumed |       |      | -1.755 | 569.865 | .040  | .080  | -299.0484 | 170.3861 | -633.7098  | 35.6130   |
| RightCerebellumCortex      | Equal variances assumed     | 1.242 | .265 | -.786  | 636     | .216  | .432  | -452.2748 | 575.5339 | -1582.4513 | 677.9017  |
|                            | Equal variances not assumed |       |      | -.780  | 596.530 | .218  | .436  | -452.2748 | 579.8450 | -1591.0606 | 686.5110  |
| RightThalamusProper        | Equal variances assumed     | .743  | .389 | -.963  | 636     | .168  | .336  | -58.1347  | 60.3476  | -176.6393  | 60.3699   |
|                            | Equal variances not assumed |       |      | -.960  | 610.216 | .169  | .337  | -58.1347  | 60.5302  | -177.0074  | 60.7380   |
| RightCaudate               | Equal variances assumed     | 2.197 | .139 | .020   | 636     | .492  | .984  | .9850     | 48.1012  | -93.4714   | 95.4415   |

|                      |                             |        |       |        |         |       |       |          |          |          |          |
|----------------------|-----------------------------|--------|-------|--------|---------|-------|-------|----------|----------|----------|----------|
|                      | Equal variances not assumed |        |       | .020   | 584.671 | .492  | .984  | .9850    | 48.6259  | -94.5177 | 96.4877  |
| RightPutamen         | Equal variances assumed     | 5.079  | .025  | 1.446  | 636     | .074  | .149  | 97.9052  | 67.6968  | -35.0311 | 230.8415 |
|                      | Equal variances not assumed |        |       | 1.424  | 565.877 | .078  | .155  | 97.9052  | 68.7692  | -37.1689 | 232.9792 |
| RightPallidum        | Equal variances assumed     | .748   | .387  | -.550  | 636     | .291  | .582  | -11.8117 | 21.4575  | -53.9479 | 30.3244  |
|                      | Equal variances not assumed |        |       | -.547  | 602.293 | .292  | .584  | -11.8117 | 21.5798  | -54.1925 | 30.5691  |
| RightHippocampus     | Equal variances assumed     | 2.178  | .140  | -.102  | 636     | .459  | .919  | -4.1399  | 40.5145  | -83.6982 | 75.4185  |
|                      | Equal variances not assumed |        |       | -.101  | 576.376 | .460  | .920  | -4.1399  | 41.0469  | -84.7596 | 76.4798  |
| RightAmygdala        | Equal variances assumed     | 1.529  | .217  | -1.504 | 636     | .067  | .133  | -33.6388 | 22.3728  | -77.5724 | 10.2947  |
|                      | Equal variances not assumed |        |       | -1.490 | 592.125 | .068  | .137  | -33.6388 | 22.5696  | -77.9651 | 10.6875  |
| RightAccumbensarea   | Equal variances assumed     | 3.289  | .070  | 1.041  | 636     | .149  | .298  | 10.7373  | 10.3158  | -9.5199  | 30.9945  |
|                      | Equal variances not assumed |        |       | 1.024  | 563.907 | .153  | .306  | 10.7373  | 10.4843  | -9.8558  | 31.3304  |
| RightVentralDC       | Equal variances assumed     | .816   | .367  | -.496  | 636     | .310  | .620  | -16.8318 | 33.9362  | -83.4724 | 49.8087  |
|                      | Equal variances not assumed |        |       | -.497  | 623.172 | .310  | .619  | -16.8318 | 33.8594  | -83.3242 | 49.6605  |
| Rightvessel          | Equal variances assumed     | 3.667  | .056  | -3.075 | 636     | .001  | .002  | -10.7041 | 3.4814   | -17.5405 | -3.8676  |
|                      | Equal variances not assumed |        |       | -3.106 | 634.472 | <.001 | .002  | -10.7041 | 3.4461   | -17.4712 | -3.9369  |
| Rightchoroidplexus   | Equal variances assumed     | .137   | .712  | 2.730  | 636     | .003  | .007  | 68.1910  | 24.9747  | 19.1481  | 117.2339 |
|                      | Equal variances not assumed |        |       | 2.731  | 618.956 | .003  | .006  | 68.1910  | 24.9658  | 19.1631  | 117.2189 |
| @5thVentricle        | Equal variances assumed     | .377   | .540  | -.178  | 636     | .429  | .859  | -.0524   | .2947    | -.6311   | .5262    |
|                      | Equal variances not assumed |        |       | -.179  | 625.427 | .429  | .858  | -.0524   | .2937    | -.6291   | .5243    |
| WMhypointensities    | Equal variances assumed     | 21.376 | <.001 | 4.623  | 636     | <.001 | <.001 | 464.3102 | 100.4295 | 267.0966 | 661.5237 |
|                      | Equal variances not assumed |        |       | 4.464  | 480.714 | <.001 | <.001 | 464.3102 | 104.0151 | 259.9298 | 668.6905 |
| nonWMhypointensities | Equal variances assumed     | 1.984  | .159  | 1.385  | 636     | .083  | .167  | 1.9123   | 1.3811   | -.7998   | 4.6244   |
|                      | Equal variances not assumed |        |       | 1.368  | 581.002 | .086  | .172  | 1.9123   | 1.3975   | -.8325   | 4.6572   |
| OpticChiasm          | Equal variances assumed     | .948   | .331  | .788   | 636     | .215  | .431  | 3.8982   | 4.9439   | -5.8101  | 13.6066  |
|                      | Equal variances not assumed |        |       | .791   | 625.535 | .215  | .429  | 3.8982   | 4.9268   | -5.7769  | 13.5733  |
| CC_Posterior         | Equal variances assumed     | .173   | .678  | -2.653 | 636     | .004  | .008  | -28.0739 | 10.5820  | -48.8537 | -7.2941  |
|                      | Equal variances not assumed |        |       | -2.646 | 611.756 | .004  | .008  | -28.0739 | 10.6081  | -48.9066 | -7.2412  |
| CC_Mid_Posterior     | Equal variances assumed     | .515   | .473  | -.079  | 636     | .468  | .937  | -.5026   | 6.3383   | -12.9492 | 11.9439  |
|                      | Equal variances not assumed |        |       | -.079  | 607.768 | .469  | .937  | -.5026   | 6.3629   | -12.9986 | 11.9934  |
| CC_Central           | Equal variances assumed     | .000   | .991  | -.405  | 636     | .343  | .685  | -2.9795  | 7.3528   | -17.4182 | 11.4592  |
|                      | Equal variances not assumed |        |       | -.404  | 609.246 | .343  | .686  | -2.9795  | 7.3776   | -17.4681 | 11.5091  |
| CC_Mid_Anterior      | Equal variances assumed     | 17.066 | <.001 | 2.466  | 636     | .007  | .014  | 27.1604  | 11.0143  | 5.5316   | 48.7892  |
|                      | Equal variances not assumed |        |       | 2.421  | 555.214 | .008  | .016  | 27.1604  | 11.2178  | 5.1259   | 49.1949  |
| CC_Anterior          | Equal variances assumed     | 2.523  | .113  | .556   | 636     | .289  | .579  | 7.1559   | 12.8811  | -18.1389 | 32.4506  |

|                          |                             |        |       |        |         |      |      |                |               |                |              |
|--------------------------|-----------------------------|--------|-------|--------|---------|------|------|----------------|---------------|----------------|--------------|
|                          | Equal variances not assumed |        |       | .549   | 582.384 | .292 | .583 | 7.1559         | 13.0297       | -18.4351       | 32.7468      |
| BrainSegVol              | Equal variances assumed     | 8.517  | .004  | -1.790 | 636     | .037 | .074 | -19811.586     | 11066.590     | -41543.060     | 1919.887     |
|                          | Equal variances not assumed |        |       | -1.759 | 557.994 | .040 | .079 | -19811.586     | 11263.544     | -41935.715     | 2312.542     |
| BrainSegVolNotVent       | Equal variances assumed     | 8.996  | .003  | -1.933 | 636     | .027 | .054 | -21226.127     | 10982.884     | -42793.227     | 340.973      |
|                          | Equal variances not assumed |        |       | -1.898 | 555.787 | .029 | .058 | -21226.127     | 11184.267     | -43194.729     | 742.475      |
| BrainSegVolNotVentSurf   | Equal variances assumed     | 9.065  | .003  | -1.950 | 636     | .026 | .052 | -21442.7592603 | 10996.5786171 | -43036.7512311 | 151.2327104  |
|                          | Equal variances not assumed |        |       | -1.915 | 555.776 | .028 | .056 | -21442.7592603 | 11198.2429916 | -43438.8132645 | 553.2947438  |
| lhCortexVol              | Equal variances assumed     | 17.161 | <.001 | -2.121 | 636     | .017 | .034 | -6777.5509504  | 3196.0551662  | -13053.6475437 | -501.4543572 |
|                          | Equal variances not assumed |        |       | -2.073 | 536.336 | .019 | .039 | -6777.5509504  | 3269.4528018  | -13200.0539741 | -355.0479268 |
| rhCortexVol              | Equal variances assumed     | 17.738 | <.001 | -1.887 | 636     | .030 | .060 | -6152.8008104  | 3260.0748556  | -12554.6129292 | 249.0113084  |
|                          | Equal variances not assumed |        |       | -1.843 | 531.225 | .033 | .066 | -6152.8008104  | 3338.8197234  | -12711.7107131 | 406.1090923  |
| CortexVol                | Equal variances assumed     | 16.790 | <.001 | -2.011 | 636     | .022 | .045 | -12930.3517548 | 6429.0631223  | -25555.1091703 | -305.5943393 |
|                          | Equal variances not assumed |        |       | -1.965 | 533.846 | .025 | .050 | -12930.3517548 | 6580.4390664  | -25857.0823766 | -3.6211330   |
| lhCorticalWhiteMatterVol | Equal variances assumed     | 2.081  | .150  | -1.736 | 636     | .042 | .083 | -3665.6242414  | 2111.6508265  | -7812.2749935  | 481.0265107  |
|                          | Equal variances not assumed |        |       | -1.720 | 590.775 | .043 | .086 | -3665.6242414  | 2131.0516381  | -7850.9832549  | 519.7347721  |
| rhCorticalWhiteMatterVol | Equal variances assumed     | 2.236  | .135  | -1.539 | 636     | .062 | .124 | -3360.96896174 | 2183.22332070 | -7648.16668924 | 926.22876576 |
|                          | Equal variances not assumed |        |       | -1.521 | 580.879 | .064 | .129 | -3360.96896174 | 2209.29387985 | -7700.14651371 | 978.20859024 |
| CorticalWhiteMatterVol   | Equal variances assumed     | 2.185  | .140  | -1.642 | 636     | .051 | .101 | -7026.5931966  | 4280.0562305  | -15431.3437188 | 1378.1573256 |
|                          | Equal variances not assumed |        |       | -1.625 | 586.555 | .052 | .105 | -7026.5931966  | 4324.5000303  | -15519.9831015 | 1466.7967082 |
| SubCortGrayVol           | Equal variances assumed     | 1.639  | .201  | -.040  | 636     | .484 | .968 | -17.983        | 445.397       | -892.608       | 856.643      |
|                          | Equal variances not assumed |        |       | -.040  | 598.805 | .484 | .968 | -17.983        | 448.423       | -898.656       | 862.691      |
| TotalGrayVol             | Equal variances assumed     | 14.793 | <.001 | -1.947 | 636     | .026 | .052 | -14002.7836773 | 7193.4140765  | -28128.4977943 | 122.9304396  |
|                          | Equal variances not assumed |        |       | -1.906 | 542.329 | .029 | .057 | -14002.7836773 | 7348.4925349  | -28437.7790247 | 432.2116700  |
| SupraTentorialVol        | Equal variances assumed     | 8.978  | .003  | -1.767 | 636     | .039 | .078 | -18519.1207528 | 10480.5353749 | -39099.7581143 | 2061.5166086 |

|                               |                             |        |       |        |         |       |       |                |               |                |               |
|-------------------------------|-----------------------------|--------|-------|--------|---------|-------|-------|----------------|---------------|----------------|---------------|
|                               | Equal variances not assumed |        |       | -1.735 | 555.245 | .042  | .083  | -18519.1207528 | 10674.0889835 | -39485.6534114 | 2447.4119057  |
| SupraTentorialVolNotVent      | Equal variances assumed     | 9.183  | .003  | -1.901 | 636     | .029  | .058  | -19767.6752665 | 10400.9730077 | -40192.0759312 | 656.7253981   |
|                               | Equal variances not assumed |        |       | -1.865 | 553.080 | .031  | .063  | -19767.6752665 | 10598.5150956 | -40585.9402627 | 1050.5897296  |
| SupraTentorialVolNotVentVox   | Equal variances assumed     | 9.149  | .003  | -1.905 | 636     | .029  | .057  | -19781.505     | 10385.682     | -40175.878     | 612.868       |
|                               | Equal variances not assumed |        |       | -1.869 | 552.812 | .031  | .062  | -19781.505     | 10583.607     | -40570.508     | 1007.498      |
| MaskVol                       | Equal variances assumed     | .550   | .459  | 1.158  | 636     | .124  | .247  | 12420.657      | 10721.727     | -8633.608      | 33474.922     |
|                               | Equal variances not assumed |        |       | 1.151  | 599.542 | .125  | .250  | 12420.657      | 10792.138     | -8774.332      | 33615.646     |
| BrainSegVoltoeTIV             | Equal variances assumed     | 11.178 | <.001 | -3.395 | 636     | <.001 | <.001 | -.019438466    | .005725387    | -.030681413    | -.00819519    |
|                               | Equal variances not assumed |        |       | -3.351 | 576.724 | <.001 | <.001 | -.019438466    | .005800100    | -.030830359    | -.008046572   |
| MaskVoltoeTIV                 | Equal variances assumed     | .419   | .518  | .185   | 636     | .427  | .853  | .000934649     | .005059142    | -.008999993    | .010869291    |
|                               | Equal variances not assumed |        |       | .190   | 621.216 | .425  | .850  | .000934649     | .004925032    | -.008737081    | .010606378    |
| lhSurfaceHoles                | Equal variances assumed     | 20.907 | <.001 | 5.882  | 636     | <.001 | <.001 | 31.555         | 5.365         | 21.020         | 42.089        |
|                               | Equal variances not assumed |        |       | 5.649  | 456.447 | <.001 | <.001 | 31.555         | 5.586         | 20.577         | 42.533        |
| rhSurfaceHoles                | Equal variances assumed     | 23.271 | <.001 | 6.036  | 636     | <.001 | <.001 | 31.136         | 5.159         | 21.007         | 41.266        |
|                               | Equal variances not assumed |        |       | 5.790  | 451.813 | <.001 | <.001 | 31.136         | 5.377         | 20.569         | 41.704        |
| SurfaceHoles                  | Equal variances assumed     | 22.445 | <.001 | 6.024  | 636     | <.001 | <.001 | 62.691         | 10.406        | 42.256         | 83.126        |
|                               | Equal variances not assumed |        |       | 5.781  | 452.907 | <.001 | <.001 | 62.691         | 10.845        | 41.379         | 84.004        |
| EstimatedTotalIntraCranialVol | Equal variances assumed     | .010   | .922  | .650   | 636     | .258  | .516  | 7638.7788454   | 11749.7721558 | -15434.2599993 | 30711.8176900 |
|                               | Equal variances not assumed |        |       | .651   | 622.357 | .258  | .515  | 7638.7788454   | 11727.7443873 | -15391.9666552 | 30669.5243459 |
